# Supplementary material for: Age-related differences in glycaemic control, cardiovascular disease risk factors and treatment in patients with type 2 diabetes: a cross-sectional study from the Australian National Diabetes Audit
Source: PubMed Central journal article supplement — BMJ Open. 2018 Aug 17;8(8):e020677. doi: 10.1136/bmjopen-2017-020677 (PMC6104781; doi:10.1136/bmjopen-2017-020677), 2018-08-17
Supplement: bmjopen-2017-020677.draft_revisions.pdf [file bmjopen-2017-020677.draft_revisions.pdf]

# BMJ Open

BMJ Open is committed to open peer review. As part of this commitment we make the peer review history of every article we publish publicly available.

When an article is published we post the peer reviewers' comments and the authors' responses online. We also post the versions of the paper that were used during peer review. These are the versions that the peer review comments apply to.

The versions of the paper that follow are the versions that were submitted during the peer review process. They are not the versions of record or the final published versions. They should not be cited or distributed as the published version of this manuscript.

BMJ Open is an open access journal and the full, final, typeset and author-corrected version of record of the manuscript is available on our site with no access controls, subscription charges or pay-per-view fees (<http://bmjopen.bmj.com>).

If you have any questions on BMJ Open's open peer review process please email [info.bmjopen@bmj.com](mailto:info.bmjopen@bmj.com)

# BMJ Open

## Age related differences in glycaemic control, cardiovascular disease risk factors and treatment in patients with type 2 diabetes: a cross-sectional study from the Australian National Diabetes Audit

|                                 |                                                                                                                                                                                                                                                                                                                                                                                                                                                                                                                                                                                                                                                                                                                                                                                                                                                                                         |
|---------------------------------|-----------------------------------------------------------------------------------------------------------------------------------------------------------------------------------------------------------------------------------------------------------------------------------------------------------------------------------------------------------------------------------------------------------------------------------------------------------------------------------------------------------------------------------------------------------------------------------------------------------------------------------------------------------------------------------------------------------------------------------------------------------------------------------------------------------------------------------------------------------------------------------------|
| Journal:                        | <i>BMJ Open</i>                                                                                                                                                                                                                                                                                                                                                                                                                                                                                                                                                                                                                                                                                                                                                                                                                                                                         |
| Manuscript ID                   | bmjopen-2017-020677                                                                                                                                                                                                                                                                                                                                                                                                                                                                                                                                                                                                                                                                                                                                                                                                                                                                     |
| Article Type:                   | Research                                                                                                                                                                                                                                                                                                                                                                                                                                                                                                                                                                                                                                                                                                                                                                                                                                                                                |
| Date Submitted by the Author:   | 27-Nov-2017                                                                                                                                                                                                                                                                                                                                                                                                                                                                                                                                                                                                                                                                                                                                                                                                                                                                             |
| Complete List of Authors:       | Nanayakkara, Natalie; Monash University, School of Public Health and Preventive Medicine<br>Ranasinha, Sanjeeva; Monash University, Faculty of Medicine, Nursing & Health Sciences<br>Gadowski, Adelle; Monash University, School of Public Health and Preventive Medicine<br>Davis, Wendy; University of Western Australia, Fremantle Hospital, School of Medicine and Pharmacology<br>Flack, Jeffrey; Bankstown-Lidcombe Hospital, Diabetes Centre; University of New South Wales - Randwick Campus, Faculty of Medicine<br>Wischer, Natalie; National Association of Diabetes Centres<br>Andrikopoulos, Sof; University of Melbourne, Department of Medicine (AH)<br>Zoungas, Sophia; Monash University, . Monash Centre for Health Research and Implementation-MCHRI, School of Public Health and Preventive Medicine; University of Sydney, The George Institute for Global Health |
| <b>Primary Subject Heading</b>: | Diabetes and endocrinology                                                                                                                                                                                                                                                                                                                                                                                                                                                                                                                                                                                                                                                                                                                                                                                                                                                              |
| Secondary Subject Heading:      | Epidemiology                                                                                                                                                                                                                                                                                                                                                                                                                                                                                                                                                                                                                                                                                                                                                                                                                                                                            |
| Keywords:                       | DIABETES & ENDOCRINOLOGY, Cardiac Epidemiology < CARDIOLOGY, Diabetes & endocrinology < INTERNAL MEDICINE                                                                                                                                                                                                                                                                                                                                                                                                                                                                                                                                                                                                                                                                                                                                                                               |
|                                 |                                                                                                                                                                                                                                                                                                                                                                                                                                                                                                                                                                                                                                                                                                                                                                                                                                                                                         |

SCHOLARONE™  
Manuscripts

1  
2  
3 **Age related differences in glycaemic control, cardiovascular disease risk factors**  
4  
5 **and treatment in patients with type 2 diabetes: a cross-sectional study from the**  
6  
7 **Australian National Diabetes Audit**  
8  
9

10  
11 Natalie Nanayakkara<sup>1,2</sup>, Sanjeeva Ranasinha<sup>1</sup>, Adelle M Gadowski<sup>2</sup>, Wendy Davis<sup>3</sup>, Jeff R Flack<sup>4,5,6</sup>, Natalie  
12 Wischer<sup>7</sup>, Sofianos Andrikopoulos<sup>8</sup>, Sophia Zoungas<sup>1,2,9</sup>  
13  
14  
15

16  
17 **Affiliations**

- 18  
19 1. Monash Centre for Health Research and Implementation – MCHRI, School Public Health and  
20 Preventive Medicine, Monash University in partnership with Monash Health, Locked Bag 29, Clayton,  
21 VIC 3168, Australia  
22  
23 2. Department of Epidemiology and Preventive Medicine, School of Public Health and Preventive  
24 Medicine, Monash University, The Alfred Centre, 99 Commercial Road, Melbourne VIC 3004  
25  
26 3. School of Medicine and Pharmacology, University of Western Australia, Fremantle Hospital, PO Box  
27 480, Fremantle, Western Australia 6959, Australia  
28  
29 4. Diabetes Centre, Bankstown-Lidcombe Hospital, Bankstown, NSW, Australia  
30  
31 5. Faculty of Medicine, University of NSW, Sydney NSW, Australia  
32  
33 6. School of Medicine, Western Sydney University, Sydney, NSW, Australia  
34  
35 7. National Association of Diabetes Centres, Sydney, NSW 2000 Australia  
36  
37 8. Australian Diabetes Society, Sydney, NSW 2000 Australia  
38  
39 9. The George Institute for Global Health, Camperdown, NSW 2050 Australia  
40  
41  
42  
43

44 **Corresponding Author**

45  
46  
47 Professor Sophia Zoungas

48  
49  
50 School of Public Health and Preventive Medicine, Monash University

51  
52  
53 Tel.: +61 3 9594 7500; Fax: +61 3 9594 7554

54  
55  
56 E-mail: [sophia.zoungas@monash.edu](mailto:sophia.zoungas@monash.edu)  
57

## Abstract

**Objective:** To compare the glycaemic control and cardiovascular risk factor profiles of younger and older patients with type 2 diabetes. Cross-sectional analysis of data from the 2015 Australian National Diabetes Audit (ANDA) was undertaken.

**Methods:** Data were obtained from adults with type 2 diabetes presenting to Australian secondary/tertiary diabetes centres. Logistic regression examined associations with HbA1c >7% (53 mmol/mol) and cardiovascular risk factors.

**Results:** Data from 3,492 patients were analysed. Mean ( $\pm$ SD) age was 62.9 $\pm$ 12.5 years, mean diabetes duration 13.5 $\pm$ 9.4 years and mean HbA1c 8.2 $\pm$ 1.8%. Mean HbA1c was 8.6 $\pm$ 2.1% and 8.0 $\pm$ 1.6% for the younger (<60 years) and older subgroups ( $\geq$ 60 years) respectively ( $p$ <0.001). The odds (aOR) of HbA1c above >7.0% was 1.5 times higher (95%CI 1.22-1.84) for younger patients compared with older patients after adjustment for gender, smoking, diabetes duration, renal function and body mass index. Younger patients were also more likely to have dyslipidaemia (aOR 2.02 [1.53-2.68],  $p$ <0.001), be obese (aOR 1.25 [1.05-1.49]),  $p$ <0.001) and be current smokers (aOR 2.13 [1.64-2.77],  $p$ <0.001) than older patients.

**Conclusions:** Younger age was associated with poorer glycaemic control and adverse cardiovascular risk factor profiles. It is imperative to optimise and monitor treatment in order to improve long-term outcomes.

**Strengths and limitations of this study:**

- large dataset of patients from a nation-wide survey
- information on a broad range of variables with potential impact on glycaemic, blood pressure and lipid control

1  
2  
3  
4  
5  
6  
7  
8  
9  
10  
11  
12  
13  
14  
15  
16  
17  
18  
19  
20  
21  
22  
23  
24  
25  
26  
27  
28  
29  
30  
31  
32  
33  
34  
35  
36  
37  
38  
39  
40  
41  
42  
43  
44  
45  
46  
47  
48  
49  
50  
51  
52  
53  
54  
55  
56  
57  
58  
59  
60

- We were unable to conduct longitudinal analyses as the data were de-identified and the cross-sectional nature of the analysis precluded investigation of causality.
- Study population may largely represent a specialist referred patient group as the majority of patients were receiving care at tertiary diabetes centres

For peer review only

## 1. Introduction

Driven by ageing populations, increasing obesity and decreasing physical activity, the prevalence of diabetes is expected to rise by 55% to 592 million individuals worldwide by 2035(1). Traditionally a disease of middle and older age, type 2 diabetes is increasingly diagnosed in younger patients (2, 3). Diabetes and its complications contribute to 10% of Australian deaths (4) and 8.4 % of deaths worldwide (5).

The US National Health and Nutrition Examination Survey (NHANES) indicated that the prevalence of type 2 diabetes has increased by 70% in people aged 20-44 years in the last three decades, making younger adults the fastest growing group of people with type 2 diabetes (6). Diabetes complications are related to duration and degree of glycaemic control (7), thus younger people with diabetes who start their hyperglycaemic exposure at an earlier age may be at highest risk for end-organ damage. However, few studies have compared glycaemic control in younger and older patients with type 2 diabetes (8, 9). Further, these studies were largely conducted within selected trial cohorts (and as such the patients examined may differ from community based cohorts) and have reported variable findings of better glycaemic control in older patients (10), in younger patients (11) or no effect of age (12).

We hypothesised that there may be age-related differences in the management of patients with type 2 diabetes, which may contribute to excess cardiovascular risk in younger patients. This study investigates differences in the achieved levels and management of (1) glycaemic control and (2) cardiovascular risk factors between younger and older patients with type 2 diabetes.

## 2. Methods

### 2.1 Participants

This national, cross-sectional study examined de-identified data from the 2015 Australian National Diabetes Audit (ANDA) (13). Participants were adult patients with type 2 diabetes, presenting to one of 49 nationally accredited diabetes centres. De-identified data were sourced from a range of diabetes centres located in the community/primary care (n=16) and secondary care (n=33), with patients under the care of endocrinologists, general specialists and local general practitioners. The state and territory location of participating sites is presented in Appendix 1. Information was collected regarding all consecutive patients attending a participating diabetes centre during the one-month survey period (May or June 2015). The Australian National Diabetes Audit has received approval from the Monash Health Human Research Ethics Committee.

### 2.2 Variables

Pre-specified demographic (gender, date of birth) and clinical variables (diabetes complications, comorbid conditions, blood pressure (BP), glycated haemoglobin A1c (HbA1c), body mass index (BMI), smoking status, medications) were collected for patients with type 2 diabetes. Health professionals from participating centres examined patients, reviewed medical records including pathology results and recorded the information in a standardised data collection form. All missing data, invalid entries and discrepancies were clarified with the patients' treating centres. As per the a priori analysis plan, age at survey was calculated as date of survey (2015) minus date of birth and categorised as <60 years or  $\geq 60$  years, diabetes duration was calculated as date of survey minus date of diabetes diagnosis and categorised as <10 years or  $\geq 10$  years. Height and weight were measured to calculate BMI. Smoking status was categorised as never, previous or current. Recent

1  
2  
3 pathology results (within the last 12 months) were recorded for total cholesterol (TC), low  
4 density lipoprotein (LDL), high density lipoprotein (HDL), triglycerides (TG), HbA1c and  
5 serum creatinine; calculated estimated glomerular filtration rate (eGFR) was calculated using  
6 the Modification of Diet in Renal Disease Study (MDRD) equation (14).  
7  
8  
9  
10

### 11 12 13 14 *2.3 Outcomes*

15 The main outcome variables were HbA1c (categorised as >7.0%, 53 mmol/mol),  
16 hypertension (defined as >140 and/or 90 mmHg), dyslipidaemia (defined as either TC>4.0  
17 mmol/L, HDL<1.0 mmol/L, LDL>2.0 mmol/L or Tg>2.0 mmol/L), obesity (defined as  
18 BMI>30 kg/m<sup>2</sup>) and smoker (categorised as never, past or current).  
19  
20  
21  
22  
23  
24  
25  
26

### 27 *2.4 Statistical analysis*

28  
29 Categorical variables were summarised as percentages and differences between subgroups  
30 analysed using  $\chi^2$  test. Continuous variables were tested for normality to determine the most  
31 appropriate method for statistical analysis (parametric or non-parametric) and reported as  
32 means with standard deviations (SD) or as medians with interquartile ranges (IQR). Subgroup  
33 analyses were performed using ANOVA for normally distributed data and Mann-Whitney U  
34 tests for non-normally distributed data as appropriate. Logistic regression was used to  
35 examine factors (current age, diabetes duration, gender, smoking, calculated eGFR, BMI)  
36 associated with HbA1c, hypertension, dyslipidaemia and obesity (as the categories defined  
37 above). The selection of variables was based on identifying all measured clinical variables of  
38 known or suspected prognostic importance for the outcomes of interest and/or exhibiting a p  
39 value  $\leq 0.10$  on univariable analysis. All potential confounding variables were included in the  
40 multivariable models. Subgroup analyses were conducted to examine the effect of treatments  
41 (yes or no) including insulin, antihypertensive therapy and lipid lowering therapy in patients  
42  
43  
44  
45  
46  
47  
48  
49  
50  
51  
52  
53  
54  
55  
56  
57  
58  
59  
60



1  
2  
3 above the glycaemic, lipid and BP targets. A prescribing gap was defined as patients who  
4 were not prescribed the relevant medications despite being above the recommended targets.  
5  
6 A treatment gap was defined as patients who were above the recommended targets despite  
7 being on treatment. A sensitivity analysis examined the effect of excluding patients with less  
8 than 2 years diabetes duration, who may have not yet had opportunity to modify treatment  
9 and achieve targets. Patients were excluded from a particular analysis when data relevant to  
10 that analysis were missing, but were not excluded from other analyses where appropriate  
11 information was provided. Missing data of variables was less than 10% and not imputed. A  
12 two-sided significance level of 0.05 was considered statistically significant. All analyses were  
13 performed using Stata software version 14.2 (StataCorp, Texas, USA).  
14  
15  
16  
17  
18  
19  
20  
21  
22  
23  
24  
25  
26

### 27 3. Results

#### 28 3.1 Overall

29  
30 Data from 3,492 patients (>18 years of age) were analysed. Patients from all states and  
31 territories were included (Suppl. Table 1). Younger patients (<60 years) accounted for 38%  
32 (n=1,328) of patients. The clinical characteristics of these patients, stratified by age, are  
33 shown in Table 1. The mean ( $\pm$ SD) age of the whole group was 62.9 $\pm$ 12.5 years and the  
34 mean ages of the younger and older age groups were 50.1  $\pm$ 8.4 years and 70.7  $\pm$ 7.0 years  
35 respectively. Mean diabetes duration was 9.6 $\pm$ 7.5 years for the younger age group and  
36 15.9 $\pm$ 9.6 years for the older age group (p<0.001). There was a higher proportion of male  
37 patients in the older (56.5%) compared with the younger age group (49.5%, p<0.001). The  
38 majority of patients (64.9%) were treated at tertiary hospitals followed by community or  
39 primary care centres (35.1%). Australian birth was reported by 68.1% of the younger age  
40 group and 62.4% of the older age group (p=0.001). Microvascular and macrovascular  
41  
42  
43  
44  
45  
46  
47  
48  
49  
50  
51  
52  
53  
54  
55  
56  
57  
58  
59  
60

1  
2  
3 complications were prevalent in 35.3% and 21.6% of the younger age group and 49.3% and  
4  
5 43.4% of the older age group respectively ( $p < 0.001$  for both).  
6

### 7 *3.2 Glycaemic control*

8  
9 Mean HbA1c was  $8.2 \pm 1.8\%$  for the group overall,  $8.6 \pm 2.1\%$  and  $8.0 \pm 1.6\%$  for the younger  
10  
11 and older age groups respectively ( $p < 0.001$ ). A greater proportion of patients in the younger  
12  
13 age group had an HbA1c above 7.0% compared with the older age group (Table 1, Figure 1).  
14  
15 On univariable analysis, age, diabetes duration, gender, smoking and BMI were all associated  
16  
17 with an HbA1c above 7.0%. The unadjusted and adjusted odds ratios [95%CI] for HbA1c  
18  
19 above 7.0% were 1.26 [1.07-1.49],  $p < 0.001$  and 1.50 [1.22-1.84],  $p < 0.001$  respectively for  
20  
21 younger patients compared with older patients (Table 2, Figure 1).  
22  
23  
24  
25

26  
27 Glycaemic management was reported as diet only by 4%, oral agents by 77%, non-insulin  
28  
29 injectable therapy by 5% and insulin alone or in combination with oral agents by 61% of  
30  
31 patients. Compared with older patients, younger patients were equally likely to not be on  
32  
33 insulin treatment despite an HbA1c  $> 8.0\%$ , after adjusting for gender, diabetes duration, renal  
34  
35 function and BMI (Suppl. Table 2).  
36  
37  
38  
39

### 40 *3.3 Hypertension*

41  
42 Mean systolic blood pressure (BP) was  $130 \pm 18$  mmHg and  $134 \pm 18$  mmHg for the younger  
43  
44 and older age groups respectively ( $p < 0.001$ ). A smaller proportion of patients in the younger  
45  
46 age group were hypertensive compared with the older age group (Table 1, Figure 1). Younger  
47  
48 patients were less likely to be hypertensive compared with older patients (unadjusted OR 0.81  
49  
50 [0.70-0.95]  $p = 0.008$ ). However, after adjusting for gender, smoking, renal function and BMI  
51  
52 this effect was no longer significant (adjusted OR 0.85 [0.70-1.04],  $p = 0.119$ ) (Table 2).  
53  
54  
55  
56  
57

1  
2  
3 The overall study population prescribing and treatment gaps for hypertension were 5% and  
4 25% respectively (Figure 2). Younger patients who were hypertensive were more likely to  
5 not be on blood pressure lowering medication (prescribing gap) than older patients who were  
6 hypertensive (adjusted OR 1.84 [1.16-2.92],  $p = 0.002$ ) (Suppl. Table 2).  
7  
8  
9

### 10 11 12 13 14 *3.4 Dyslipidaemia*

15 The majority of patients in both age groups had abnormal lipid profiles but a greater  
16 proportion of patients in the younger than older age group had dyslipidaemia (Table 1, Figure  
17 1). On univariable analysis, age, diabetes duration, gender, smoking, BMI and HbA1c were  
18 associated with dyslipidaemia. The unadjusted and adjusted odds ratios [95%CI] for  
19 dyslipidaemia were 2.41 [1.91-3.03],  $p < 0.001$  and 2.02 [1.53-2.68],  $p < 0.001$  respectively for  
20 younger patients compared with older patients (Table 2).  
21  
22  
23  
24  
25  
26  
27  
28  
29  
30

31 The overall study population prescribing and treatment gaps for dyslipidaemia were 22% and  
32 60% respectively (Figure 2). Younger patients with dyslipidaemia were more likely to not be  
33 on lipid lowering medication (prescribing gap) than older patients with dyslipidaemia after  
34 adjustment for diabetes duration, gender, smoking, renal function and vascular disease  
35 (adjusted OR 1.48 [1.15-1.90],  $p = 0.002$ ) (Suppl. Table 2).  
36  
37  
38  
39  
40  
41  
42  
43

### 44 *3.5 Obesity*

45 Mean BMI was  $34.5 \pm 8.4 \text{ kg/m}^2$  and  $32.4 \pm 6.7 \text{ kg/m}^2$  for the younger and older age groups  
46 respectively ( $p < 0.001$ ). A greater proportion of patients in the younger age group had a BMI  
47 in the obese category ( $>30 \text{ kg/m}^2$ ) compared with the older age group (Table 1, Figure 2). On  
48 univariable analysis, age, gender and smoking were all associated with obesity. The  
49  
50  
51  
52  
53  
54  
55  
56  
57  
58  
59  
60

1  
2  
3 unadjusted and adjusted odds ratios for obesity were 1.26 [1.09-1.46],  $p=0.002$  and 1.25  
4 [1.05-1.49],  $p=0.002$  respectively for younger patients compared with older (Table 2).  
5  
6  
7

### 8 9 *3.6 Smoking*

10 A greater proportion of patients in the younger age group reported being a current smoker  
11 compared with older patients (Table 1, Figure 1). On univariable analysis, age, diabetes  
12 duration, gender, BMI and renal function were all associated with current smoking. The  
13 unadjusted and adjusted odds ratios for current smoking were 2.60 [2.09-3.22],  $p<0.001$  and  
14 2.13 [1.64-2.77],  $p<0.001$  respectively for younger patients compared with older patients  
15 (Table 2).  
16  
17  
18  
19  
20  
21  
22  
23  
24  
25  
26

### 27 *3.7 Sensitivity analysis*

28 When patients with diabetes duration of 2 years or less were excluded the associations were  
29 unchanged. Younger patients were still more likely to have an HbA1c over 7.0% (adjusted  
30 OR 1.59 [1.27-2.00],  $p<0.001$ ), dyslipidaemia (adjusted OR 1.89 [1.41-2.53],  $p<0.001$ ), be  
31 obese (adjusted OR 1.28 [1.06-1.55],  $p=0.010$ ) and smokers (adjusted OR 2.19 [1.64-2.92],  
32  $p<0.001$ ) than older patients after adjusting for diabetes duration, gender, renal function, BMI  
33 and HbA1c where appropriate (Suppl. Table 3).  
34  
35  
36  
37  
38  
39  
40  
41  
42  
43  
44

## 45 **4. Discussion**

46 In this large national cross-sectional study of community-living patients with type 2 diabetes,  
47 we found that younger patients with significantly shorter disease duration were less likely to  
48 achieve recommended targets for glycaemic control, blood pressure and lipids than older  
49 patients. Younger patients were also more likely to be obese and to smoke. Of patients not  
50 achieving glycaemic, blood pressure, and lipid targets, younger rather than older patients  
51  
52  
53  
54  
55  
56  
57

1  
2  
3 were more likely to not be on therapy after adjustment for other relevant confounders. These  
4 findings remained after exclusion of patients with more recent diabetes onset who may have  
5 been relatively new to diabetes services and not yet had opportunity to attain treatment targets.  
6  
7  
8  
9

10  
11 It is not clear why younger patients demonstrate poorer glycaemic control than older patients.  
12  
13 Some evidence suggests that early-onset type 2 diabetes may be a more aggressive phenotype  
14 than later-onset type 2 diabetes, representing a greater predisposition to beta cell failure and  
15 diagnosis at an earlier age (15). Since younger patients had higher rates of obesity compared  
16 with older patients, this may have contributed to worsening insulin resistance, and a need for  
17 greater intensification of therapy to achieve optimal glycaemic control. Longer duration of  
18 diabetes is also known to be associated with poorer glycaemic control, possibly due to  
19 progressive  $\beta$ -cell impairment and reduced insulin secretion (16), which in turn reduces the  
20 effectiveness of diet alone or oral agents. However, in our study the younger age group had a  
21 shorter diabetes duration than the older age group such that longer disease duration could not  
22 explain the poorer glycaemic control.  
23  
24  
25  
26  
27  
28  
29  
30  
31  
32  
33  
34  
35  
36

37 The high prevalence of poor glycaemic control and adverse cardiovascular risk factors  
38 observed in younger patients is of great concern as cardiovascular disease accounts for over  
39 half of the mortality among people with type 2 diabetes (17, 18). Given the risk for  
40 cardiovascular disease doubles when hypertension is also present in people with diabetes (19)  
41 and over a quarter of the patients in the younger age group had either systolic or diastolic  
42 hypertension, a review of the intensity of management is in order. This is supported by the  
43 larger prescribing and treatment gaps observed in the younger rather than older patients. In  
44 contrast, for older patients it is possible that clinicians' concerns regarding hypotension and  
45  
46  
47  
48  
49  
50  
51  
52  
53  
54  
55  
56  
57  
58  
59  
60

1  
2  
3 postural symptoms due to autonomic neuropathy may appropriately limit antihypertensive  
4  
5 use.  
6  
7

8  
9 Although the absolute differences in the lipid variables were not large between the younger  
10 and older age groups, it is noteworthy that among younger patients and in line with other  
11 international studies, 89% had abnormal lipids (20). High density cholesterol levels,  
12  
13 considered the best lipid predictor of cardiovascular disease (21), were significantly lower  
14  
15 and triglyceride levels significantly higher in younger patients compared with older patients  
16  
17 suggestive of inadequate lipid management. The relative insulin deficiency seen in type 2  
18  
19 diabetes is known to impair the action of lipoprotein lipase, resulting in lower HDL levels  
20  
21 and higher triglyceride levels. However, the lower HDL and higher triglyceride observed in  
22  
23 younger patients cannot be attributed solely to the effect of hyperglycaemia as younger age  
24  
25 remained independently associated with dyslipidaemia when HbA1c was included in the  
26  
27 multivariable model. Another possible explanation is survivor effect bias whereby patients  
28  
29 with normal lipid levels have survived longer (and into the older age group) compared with  
30  
31 those with dyslipidaemia.  
32  
33  
34  
35  
36  
37  
38

39 It is recognised that estimates of absolute cardiovascular risk (even for those with diabetes)  
40 are driven predominantly by age rather than modifiable risk factors (22). Indeed, in our study  
41  
42 the majority of patients in the younger age group would have low absolute cardiovascular risk  
43  
44 despite significant risk factor burden. The Global Burden of Disease study reported that the  
45  
46 maximum impact in terms of healthy life-years gained or disability adjusted life years averted  
47  
48 with cardiovascular preventive therapies would be observed between 55-64 years (23).  
49  
50  
51 However, vascular complications develop over many decades from a young age (24), well  
52  
53 before presentation with a potentially fatal event. Additionally, younger patients have higher  
54  
55  
56  
57  
58  
59  
60

1  
2  
3 modifiable risk (risk factors amenable to treatment) and longer future lifetime exposure for  
4 any particular absolute risk level when compared to older people. As highlighted by our  
5 findings, a major outstanding challenge is how best to implement use of evidence-based  
6 preventive therapies in younger patients and to effectively communicate risk of future events.  
7  
8 Among newer approaches are the concepts of heart or vascular age (25) and of lifetime or  
9 modifiable risk, particularly in younger patients. This is consistent with the American College  
10 of Cardiology /American Heart Association (ACC/AHA) guidelines recommending  
11 assessment of lifetime risk in younger patients in addition to the traditional absolute risk  
12 assessment (26).  
13  
14  
15  
16  
17  
18  
19  
20  
21  
22  
23

24 Other explanations for our findings include that younger patients may face more hurdles to  
25 glucose testing, regular physical activity, healthy diet, and medication adherence whereas  
26 older patients may access medical care more frequently, may be more motivated to manage  
27 their medical conditions and may be more compliant with diet and medications (27-29).  
28  
29  
30  
31  
32

33 Further research is required to understand the barriers to better glycaemic control and  
34 cardiovascular risk profiles faced by younger patients. These data are crucial to inform  
35 strategies to assist weight reduction, lifestyle modification and escalation of glycaemic, anti-  
36 hypertensive and lipid lowering therapies. Such measures would particularly benefit younger  
37 patients with type 2 diabetes, given that the incidence of macrovascular complications and  
38 mortality increases with diabetes duration (7) and is reduced with management of glycaemia  
39 and cardiovascular risk factors (17, 18). Good glycaemic control earlier in the course of  
40 diabetes may also be imperative, as this is demonstrated to reduce complications in the long  
41 term (30).  
42  
43  
44  
45  
46  
47  
48  
49  
50  
51  
52  
53  
54  
55  
56  
57  
58  
59  
60

1  
2  
3 The proportion of patients with hypertension and dyslipidaemia in our study was similar to  
4 that reported in the population-based AusDiab study. However, the proportion of patients  
5 overall with an HbA1c target  $\leq 7.0\%$  was greater in our study than in the AusDiab study (31)  
6 and the community-based Fremantle Diabetes Study (8). In our study younger patients had  
7 poorer glycaemic control with a mean diabetes duration approximately half that of older  
8 patients. Higher HbA1c levels have previously been independently associated with younger  
9 age (8). In contrast, the Australian general practice based NEFRON study, found that younger  
10 and more obese patients with a longer duration of diabetes had poor glycaemic control (9).  
11 The differences in these studies may be due to the varying sampling frames and population  
12 characteristics.  
13  
14  
15  
16  
17  
18  
19  
20  
21  
22  
23  
24  
25

26 A strength of this analysis is the large dataset of patients from a nation-wide survey. Data  
27 were sourced from over half of the centres registered with the National Association of  
28 Diabetes centres (NADC) at the time. The participants of our study are likely to be similar to  
29 patients attending diabetes clinics throughout Australia. We obtained information on a broad  
30 range of variables with potential impact on glycaemic, blood pressure and lipid control. Study  
31 limitations include that the majority of patients were receiving care at tertiary diabetes centres  
32 and may largely represent a specialist referred patient group. Referral bias is also possible.  
33 General practitioners may be more likely to refer younger patients whilst managing older  
34 patients with shorter diabetes duration. Alternatively, older patients with longer diabetes  
35 duration and interrelating co-morbid conditions may also be more likely to be referred to  
36 specialist services. Another limitation was the reliance on self/healthcare worker reports as  
37 we were unable to independently verify diagnoses and treatments. This is unlikely to change  
38 the findings substantively, given previous studies have found approximately 90% of self-  
39 reported diabetes information to be valid (32). We were unable to conduct longitudinal  
40  
41  
42  
43  
44  
45  
46  
47  
48  
49  
50  
51  
52  
53  
54  
55  
56  
57  
58  
59  
60



1  
2  
3 analyses as the data were de-identified and the cross-sectional nature of the analysis  
4  
5 precluded investigation of causality.  
6  
7  
8

## 9 5. Conclusion

10  
11 In summary, younger patients with type 2 diabetes attending diabetes centres are burdened by  
12  
13 poorer glycaemic control and cardiovascular risk factor profiles compared with older patients.  
14  
15 Of patients not achieving glycaemic, blood pressure, and lipid targets, younger patients were  
16  
17 significantly more likely to not be on therapy or be above target despite treatment than older  
18  
19 patients. Younger patients with diabetes may benefit from more targeted, evidence-based,  
20  
21 multi-disciplinary initiatives to achieve and maintain intensive glycaemic control and  
22  
23 optimise cardiovascular risk factors. Such measures may minimise the incidence and severity  
24  
25 of diabetes related complications in younger patients with type 2 diabetes, thereby reducing  
26  
27 morbidity and mortality.  
28  
29  
30  
31  
32  
33  
34  
35  
36  
37  
38  
39  
40  
41  
42  
43  
44  
45  
46  
47  
48  
49  
50  
51  
52  
53  
54  
55  
56  
57  
58  
59  
60

## Acknowledgements

We thank the participating diabetes centres for their time and generous contribution to the Australian National Diabetes Audit.

## Authors' Contributions

NN: study design, literature review, statistical analysis, critical discussion, drafting and revision of the manuscript

AG: statistical analysis, critical discussion, revision of the manuscript

SR: statistical analysis and interpretation of the data, revision of the manuscript

WD: critical revision of the manuscript

JF: critical revision of the manuscript

NW: study conception and design, revision of the manuscript

SA: study conception and design, critical revision of the manuscript

SZ: study conception and design, design of analyses, critical revision of the manuscript, supervision of the project.

The authors NN, SR, and SZ had full access to the data and take responsibility for the integrity of the data and accuracy of the analysis. All authors have read and approved the final manuscript.

## Funding

The Commonwealth Department of Health and Ageing funds the Australian National Diabetes Audit. This research has received no specific grant from any other funding agency in the public, commercial or not-for profit sectors.

## Data Sharing Statement

1  
2  
3 Application for datasets generated during and/or analysed during the current study may be  
4  
5 considered by the corresponding author on reasonable request.  
6

7  
8 Competing interests  
9

10 W. Davis reports past participation in advisory boards and/or receiving honoraria from Novo  
11 Nordisk and Eli Lilly Australia. N. Wischer reports past participation in advisory boards  
12 and/or receiving honoraria from AstraZeneca Pty Ltd/, Eli Lilly Australia, Merck Sharp &  
13 Dohme (Australia) Pty Ltd, Sanofi Aventis Pty Ltd, Novo Nordisk. S Andrikopoulos reports  
14 past participation in advisory boards and/or receiving honoraria from GlaxoSmithKline Pty  
15 Ltd, Novartis Pty Ltd, AstraZeneca Pty Ltd/Bristol-Myers Squibb Australia Pty Ltd, Eli Lilly  
16 Australia, Janssen Cilag Pty Ltd, Merck Sharp & Dohme (Australia) Pty Ltd, Sanofi Aventis  
17 Pty Ltd, Novo Nordisk, Servier Laboratories Pty Ltd S Zoungas reports past participation in  
18 advisory boards/contract work on behalf of Monash University with AstraZeneca Pty Ltd,  
19 Merck Sharp & Dohme (Australia) Pty Ltd and Novo Nordisk Pty Ltd. S Zoungas holds a  
20 NHMRC senior research fellowship.  
21  
22  
23  
24  
25  
26  
27  
28  
29  
30  
31  
32  
33  
34  
35  
36  
37  
38  
39  
40  
41  
42  
43  
44  
45  
46  
47  
48  
49  
50  
51  
52  
53  
54  
55  
56  
57  
58  
59  
60

## References

1. Guariguata L, Whiting D, Hambleton I, Beagley J, Linnenkamp U, Shaw J. Global estimates of diabetes prevalence for 2013 and projections for 2035. *Diabetes research and clinical practice*. 2014;103(2):137-49.
2. Rahelic D. [7th Edition of Idf Diabetes Atlas--Call for Immediate Action]. *Lijecnicki vjesnik*. 2016;138(1-2):57-8.
3. Song SH, Hardisty CA. Early-onset Type 2 diabetes mellitus: an increasing phenomenon of elevated cardiovascular risk. *Expert Rev Cardiovasc Ther*. 2008;6(3):315-22.
4. Welfare ALOHa. Deaths from diabetes: Australian Institute of Health and Welfare; 2017 [cited 2017]. Available from: <http://www.aihw.gov.au/diabetes/deaths/>.
5. Group IDFDA. Update of mortality attributable to diabetes for the IDF Diabetes Atlas: estimates for the year 2011. *Diabetes Res Clin Pract*. 2013;100(2):277-9.
6. Menke A, Casagrande S, Geiss L, Cowie CC. Prevalence of and Trends in Diabetes Among Adults in the United States, 1988-2012. *Jama*. 2015;314(10):1021-9.
7. Zoungas S, Woodward M, Li Q, Cooper ME, Hamet P, Harrap S, et al. Impact of age, age at diagnosis and duration of diabetes on the risk of macrovascular and microvascular complications and death in type 2 diabetes. *Diabetologia*. 2014;57(12):2465-74.
8. Skinner TC, Bruce DG, Davis TM, Davis WA. Personality traits, self-care behaviours and glycaemic control in type 2 diabetes: the Fremantle diabetes study phase II. *Diabet Med*. 2014;31(4):487-92.
9. Macisaac RJ, Jerums G, Weekes AJ, Thomas MC. Patterns of glycaemic control in Australian primary care (NEFRON 8). *Internal medicine journal*. 2009;39(8):512-8.
10. El-Kebbi IM, Cook CB, Ziemer DC, Miller CD, Gallina DL, Phillips LS. Association of younger age with poor glycemic control and obesity in urban african americans with type 2 diabetes. *Archives of internal medicine*. 2003;163(1):69-75.
11. Smith NL, Heckbert SR, Bittner VA, Savage PJ, Barzilay JI, Dobs AS, et al. Antidiabetic treatment trends in a cohort of elderly people with diabetes. The cardiovascular health study, 1989-1997. *Diabetes care*. 1999;22(5):736-42.
12. Shorr RI, Franse LV, Resnick HE, Di Bari M, Johnson KC, Pahor M. Glycemic control of older adults with type 2 diabetes: findings from the Third National Health and Nutrition Examination Survey, 1988-1994. *Journal of the American Geriatrics Society*. 2000;48(3):264-7.
13. Health Do. Australian National Diabetes Audit (ANDA): Commonwealth of Australia; 2017 [updated 16 May 2017; cited 2017 17/6/2017]. Available from: <http://www.health.gov.au/internet/main/publishing.nsf/content/pq-diabetes-pubs>.
14. Levey AS, Bosch JP, Lewis JB, Greene T, Rogers N, Roth D. A more accurate method to estimate glomerular filtration rate from serum creatinine: a new prediction equation. Modification of Diet in Renal Disease Study Group. *Annals of internal medicine*. 1999;130(6):461-70.
15. Song SH, Hardisty CA. Early onset type 2 diabetes mellitus: a harbinger for complications in later years--clinical observation from a secondary care cohort. *Qjm*. 2009;102(11):799-806.
16. Saad MF, Knowler WC, Pettitt DJ, Nelson RG, Mott DM, Bennett PH. Sequential changes in serum insulin concentration during development of non-insulin-dependent diabetes. *Lancet*. 1989;1(8651):1356-9.
17. Cea Soriano L, Johansson S, Stefansson B, Rodriguez LA. Cardiovascular events and all-cause mortality in a cohort of 57,946 patients with type 2 diabetes: associations with renal function and cardiovascular risk factors. *Cardiovascular diabetology*. 2015;14:38.
18. Chen YY, Lin YJ, Chong E, Chen PC, Chao TF, Chen SA, et al. The impact of diabetes mellitus and corresponding HbA1c levels on the future risks of cardiovascular disease and mortality: a representative cohort study in Taiwan. *PloS one*. 2015;10(4):e0123116.
19. American Diabetes A. Treatment of hypertension in adults with diabetes. *Diabetes care*. 2002;25(1):199-201.

- 1
- 2
- 3 20. Hillier TA, Pedula KL. Characteristics of an adult population with newly diagnosed type 2
- 4 diabetes: the relation of obesity and age of onset. *Diabetes care*. 2001;24(9):1522-7.
- 5 21. Ingelsson E, Schaefer EJ, Contois JH, McNamara JR, Sullivan L, Keyes MJ, et al. Clinical utility
- 6 of different lipid measures for prediction of coronary heart disease in men and women. *Jama*.
- 7 2007;298(7):776-85.
- 8 22. Zoungas S, Curtis A, Tonkin A, McNeil J. Statins in the elderly: an answered question? *Current*
- 9 *opinion in cardiology*. 2014;29(4):372-80.
- 10 23. Murray CJ, Lauer JA, Hutubessy RC, Niessen L, Tomijima N, Rodgers A, et al. Effectiveness
- 11 and costs of interventions to lower systolic blood pressure and cholesterol: a global and regional
- 12 analysis on reduction of cardiovascular-disease risk. *Lancet*. 2003;361(9359):717-25.
- 13 24. Berenson GS, Srinivasan SR, Xu JH, Chen W. Adiposity and Cardiovascular Risk Factor
- 14 Variables in Childhood Are Associated With Premature Death From Coronary Heart Disease in Adults:
- 15 The Bogalusa Heart Study. *The American journal of the medical sciences*. 2016;352(5):448-54.
- 16 25. Vasan RS, Kannel WB. Strategies for cardiovascular risk assessment and prevention over the
- 17 life course: progress amid imperfections. *Circulation*. 2009;120(5):360-3.
- 18 26. Goff DC, Jr., Lloyd-Jones DM, Bennett G, Coady S, D'Agostino RB, Sr., Gibbons R, et al. 2013
- 19 ACC/AHA guideline on the assessment of cardiovascular risk: a report of the American College of
- 20 Cardiology/American Heart Association Task Force on Practice Guidelines. *Journal of the American*
- 21 *College of Cardiology*. 2014;63(25 Pt B):2935-59.
- 22 27. Adekoya N. Patients seen in emergency departments who had a prior visit within the
- 23 previous 72 h-National Hospital Ambulatory Medical Care Survey, 2002. *Public health*.
- 24 2005;119(10):914-8.
- 25 28. Bezie Y, Molina M, Hernandez N, Batista R, Niang S, Huet D. Therapeutic compliance: a
- 26 prospective analysis of various factors involved in the adherence rate in type 2 diabetes. *Diabetes &*
- 27 *metabolism*. 2006;32(6):611-6.
- 28 29. Ahmad NS, Ramli A, Islahudin F, Paraidathathu T. Medication adherence in patients with
- 29 type 2 diabetes mellitus treated at primary health clinics in Malaysia. *Patient preference and*
- 30 *adherence*. 2013;7:525-30.
- 31 30. Zoungas S, Chalmers J, Neal B, Billot L, Li Q, Hiraakawa Y, et al. Follow-up of blood-pressure
- 32 lowering and glucose control in type 2 diabetes. *The New England journal of medicine*.
- 33 2014;371(15):1392-406.
- 34 31. Tanamas S, Magliano D, Lynch BM, Willenberg L, Polkinghorne KR, Chadban S, et al. *AusDiab*
- 35 2012. The Australian Diabetes, Obesity and Lifestyle Study. Melbourne: Baker IDI Heart and Diabetes
- 36 Institute; 2012.
- 37 32. Kahn LB, Marshall JA, Baxter J, Shetterly SM, Hamman RF. Accuracy of reported family
- 38 history of diabetes mellitus. Results from San Luis Valley Diabetes Study. *Diabetes care*.
- 39 1990;13(7):796-8.
- 40
- 41
- 42
- 43
- 44
- 45
- 46
- 47
- 48
- 49
- 50
- 51
- 52
- 53
- 54
- 55
- 56
- 57
- 58
- 59
- 60

## Tables and Figures

**Table 1:** Characteristics of study participants

| Characteristic*                                | Age                 |                     | p value |
|------------------------------------------------|---------------------|---------------------|---------|
|                                                | <60 years<br>n=1328 | ≥60 years<br>n=2164 |         |
| Age to 2015 (years)                            | 50.1 (8.4)          | 70.7 (7.0)          | <0.001  |
| Male                                           | 650 (49.5)          | 1208 (56.5)         | <0.001  |
| Age when diabetes first diagnosed (years)      | 40.6 (9.4)          | 54.9 (10.6)         | <0.001  |
| Diabetes duration (years)                      | 9.6 (7.5)           | 15.9 (9.6)          | <0.001  |
| HbA1c (%)                                      | 8.6 (2.1)           | 8.0 (1.6)           | <0.001  |
| <u>Cardiovascular risk factors</u>             |                     |                     |         |
| Systolic blood pressure (mmHg)                 | 130.5 (18.1)        | 134.1 (18.6)        | <0.001  |
| Diastolic blood pressure (mmHg)                | 77.7 (10.5)         | 72.6 (10.2)         | <0.001  |
| Current smoker                                 | 235 (20.2)          | 161 (8.9)           |         |
| Past smoker                                    | 350 (30.1)          | 713 (39.4)          | <0.001  |
| Never smoker                                   | 577 (49.7)          | 936 (51.7)          |         |
| Total cholesterol (mmol/l)                     | 4.6 (1.3)           | 4.0 (1.1)           | <0.001  |
| LDL-cholesterol (mmol/l)                       | 2.4 (1.6)           | 2.0 (0.9)           | <0.001  |
| HDL-cholesterol (mmol/l)                       | 1.1 (0.4)           | 1.1 (0.4)           | 0.010   |
| Triglyceride (mmol/l)                          | 2.5 (2.4)           | 2.1 (1.7)           | <0.001  |
| Serum creatinine (µmol/l)                      | 89.5 (91.7)         | 109.5 (91.3)        | <0.001  |
| eGFR ml/min/1.73m <sup>2</sup>                 | 89.3 (35.9)         | 65.9 (27.1)         | <0.001  |
| Body Mass Index (kg/m <sup>2</sup> )           | 34.5 (8.4)          | 32.4 (6.7)          | <0.001  |
| <u>Treatments</u>                              |                     |                     |         |
| Diet alone                                     | 65 (4.9)            | 77 (3.6)            | 0.052   |
| Oral glucose lowering agents                   | 1050 (79.1)         | 1634 (75.5)         | 0.013   |
| Non-insulin injectable glucose lowering agents | 94 (7.1)            | 98 (4.5)            | 0.003   |
| Insulin                                        | 769 (57.9)          | 1348 (62.3)         | 0.010   |
| <u>Cardiovascular disease</u>                  |                     |                     |         |
| Microvascular complications                    | 414 (35.3)          | 950 (49.3)          | <0.001  |
| Macrovascular complications                    | 247 (21.6)          | 847 (43.4)          | <0.001  |

\* categorical variables were presented as n (%) and continuous variables as mean (SD) or median (IQR), as appropriate

# categorical variables were assessed with the Chi square test. Continuous variables were tested for normality, analyses were performed using ANOVA for normally distributed data and Mann-Whitney U tests for non-normally distributed data

Microvascular complications defined as retinopathy, nephropathy or peripheral neuropathy

Macrovascular complications defined as either cardiovascular, cerebrovascular or peripheral vascular disease

1  
2  
3  
4  
5  
6  
7  
8  
9  
10  
11  
12  
13  
14  
15  
16  
17  
18  
19  
20  
21  
22  
23  
24  
25  
26  
27  
28  
29  
30  
31  
32  
33  
34  
35  
36  
37  
38  
39  
40  
41  
42  
43  
44  
45  
46  
47  
48  
49  
50  
51  
52  
53  
54  
55  
56  
57  
58  
59  
60

For peer review only

**Table 2:** Unadjusted and adjusted odds of factors associated with suboptimal glycaemic control and adverse cardiovascular risk factor levels.

|                                                   | HbA1c above target (7.0%, 53 mmol/mol) |         |                        |         | Hypertension         |         |                        |         | Dyslipidaemia        |         |                        |         | Obesity              |         |                        |         | Current Smoker       |         |                        |         |
|---------------------------------------------------|----------------------------------------|---------|------------------------|---------|----------------------|---------|------------------------|---------|----------------------|---------|------------------------|---------|----------------------|---------|------------------------|---------|----------------------|---------|------------------------|---------|
|                                                   | Univariable Analysis                   |         | Multivariable Analysis |         | Univariable Analysis |         | Multivariable Analysis |         | Univariable Analysis |         | Multivariable Analysis |         | Univariable Analysis |         | Multivariable Analysis |         | Univariable Analysis |         | Multivariable Analysis |         |
|                                                   | OR (95%CI)                             | p value | OR (95%CI)             | p value | OR (95%CI)           | p value | OR (95%CI)             | p value | OR (95%CI)           | p value | OR (95%CI)             | p value | OR (95%CI)           | p value | OR (95%CI)             | p value | OR (95%CI)           | p value | OR (95%CI)             | p value |
| <b>Age</b>                                        |                                        |         |                        |         |                      |         |                        |         |                      |         |                        |         |                      |         |                        |         |                      |         |                        |         |
| ≥60 y (ref)                                       |                                        |         |                        |         |                      |         |                        |         |                      |         |                        |         |                      |         |                        |         |                      |         |                        |         |
| <60 y                                             | 1.26 (1.07-1.49)                       | 0.005   | 1.50 (1.22-1.84)       | <0.001  | 0.81 (0.70-0.95)     | 0.008   | 0.85 (0.70-1.04)       | 0.119   | 2.41 (1.91-3.03)     | <0.001  | 2.02 (1.53-2.68)       | <0.001  | 1.26 (1.09-1.46)     | 0.002   | 1.25 (1.05-1.49)       | 0.011   | 2.60 (2.09-3.22)     | <0.001  | 2.13 (1.64-2.77)       | <0.001  |
| <b>Duration of Diabetes</b>                       |                                        |         |                        |         |                      |         |                        |         |                      |         |                        |         |                      |         |                        |         |                      |         |                        |         |
| <10 y (ref)                                       |                                        |         |                        |         |                      |         |                        |         |                      |         |                        |         |                      |         |                        |         |                      |         |                        |         |
| ≥10 y                                             | 2.05 (1.74-2.40)                       | <0.001  | 2.51 (2.07-3.03)       | <0.001  | 1.16 (0.99-1.35)     | 0.067   | 1.03 (0.85-1.25)       | 0.735   | 0.66 (0.53-0.81)     | <0.001  | 0.79 (0.60-1.03)       | 0.087   | 1.04 (0.90-1.20)     | 0.597   |                        |         | 0.59 (0.48-0.73)     | <0.001  | 0.82 (0.64-1.06)       | 0.124   |
| <b>Sex</b>                                        |                                        |         |                        |         |                      |         |                        |         |                      |         |                        |         |                      |         |                        |         |                      |         |                        |         |
| Male (ref)                                        |                                        |         |                        |         |                      |         |                        |         |                      |         |                        |         |                      |         |                        |         |                      |         |                        |         |
| Female                                            | 1.18 (1.01-1.38)                       | 0.039   | 1.16 (0.97-1.39)       | 0.100   | 1.02 (0.88-1.18)     | 0.828   | 0.87 (0.73-1.04)       | 0.129   | 0.76 (0.62-0.92)     | 0.005   | 0.70 (0.55-0.90)       | 0.005   | 1.34 (1.16-1.54)     | <0.001  | 1.38 (1.16-1.63)       | <0.001  | 0.70 (0.56-0.87)     | 0.001   | 0.70 (0.55-0.89)       | 0.004   |
| <b>Smoking</b>                                    |                                        |         |                        |         |                      |         |                        |         |                      |         |                        |         |                      |         |                        |         |                      |         |                        |         |
| Never (ref)                                       |                                        |         |                        |         |                      |         |                        |         |                      |         |                        |         |                      |         |                        |         |                      |         |                        |         |
| Past                                              | 1.09 (0.9-1.32)                        | 0.368   |                        |         | 0.93 (0.79-1.10)     | 0.418   | 0.90 (0.74-1.09)       | 0.287   | 1.10 (0.87-1.38)     | 0.419   | 1.01 (0.77-1.32)       | 0.947   | 1.44 (1.22-1.71)     | <0.001  | 1.63 (1.35-1.96)       | <0.001  |                      |         |                        |         |
| Current                                           | 1.09 (0.84-1.42)                       | 0.512   |                        |         | 0.65 (0.50-0.84)     | 0.001   | 0.72 (0.54-0.96)       | 0.024   | 1.73 (1.18-2.52)     | 0.005   | 1.32 (0.87-1.99)       | 0.187   | 0.93 (0.74-1.17)     | 0.517   | 0.92 (0.72-1.18)       | 0.525   |                      |         |                        |         |
| <b>eGFR (ml/min/1.73m<sup>2</sup>) (per unit)</b> | 1.00 (0.99-1.00)                       | 0.073   | 1.00 (1.00-1.01)       | 0.034   | 1.00 (0.99-1.00)     | 0.001   | 1.00 (0.99-1.00)       | 0.008   | 1.00 (1.00-1.01)     | 0.144   |                        |         | 1.00 (1.00-1.00)     | 0.307   |                        |         | 1.01 (1.01-1.01)     | <0.001  | 1.01 (1.00-1.01)       | 0.001   |
| <b>BMI (kg/m<sup>2</sup>) (per unit)</b>          | 1.03 (1.02-1.04)                       | <0.001  | 1.03 (1.02-1.04)       | <0.001  | 1.02 (1.01-1.03)     | <0.001  | 1.02 (1.01-1.03)       | 0.001   | 1.02 (1.01-1.04)     | 0.004   | 1.02 (1.00-1.03)       | 0.077   |                      |         |                        |         | 0.98 (0.97-1.00)     | 0.017   | 0.97 (0.95-0.99)       | 0.001   |
| <b>HbA1c (%) (per unit)</b>                       |                                        |         |                        |         | 1.03 (0.99-1.07)     | 0.156   |                        |         | 1.18 (1.11-1.26)     | <0.001  | 1.14 (1.05-1.23)       | 0.001   | 1.07 (1.03-1.12)     | 0.001   | 1.05 (1.00-1.10)       | 0.049   |                      |         |                        |         |

\*Multivariable analyses are, where appropriate, adjusted for gender, diabetes duration, smoking, estimated glomerular filtration rates, body mass index and HbA1c.

#Hypertension is defined as systolic blood pressure >140mmHg and/or diastolic blood pressure >90 mmHg

†Dyslipidaemia is defined as either total cholesterol >4.0 mmol/L, high density lipoprotein <1.0 mmol/L, low density lipoprotein >2.0 mmol/L or triglycerides >2.0 mmol/L

‡Obesity is defined as Body Mass Index >30 kg/m<sup>2</sup>



**Figure 1:** Risks of adverse cardiovascular risk factor levels in patients with type 2 diabetes by age group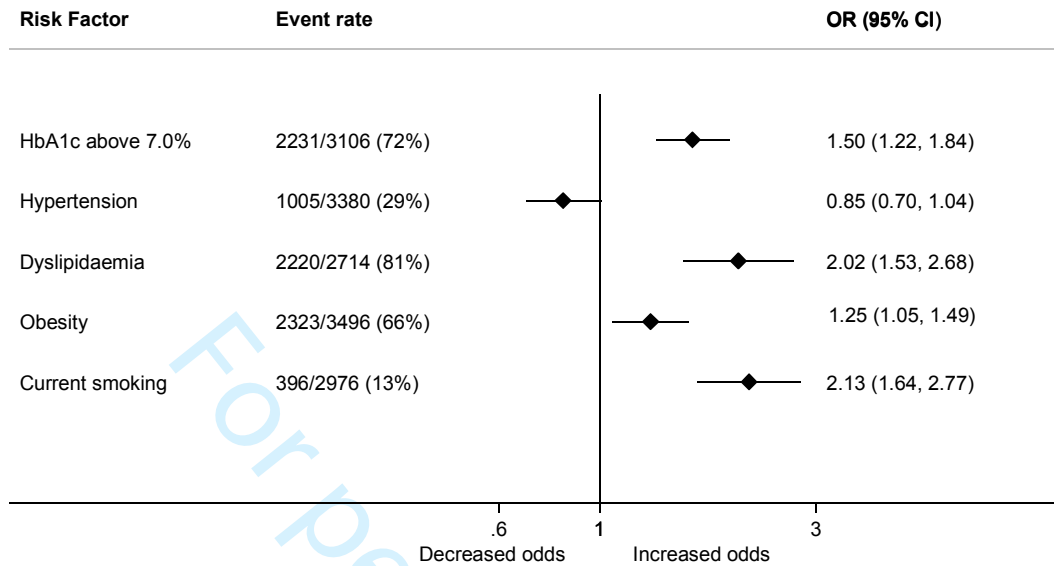

The diamonds refer to the odds ratios for patients aged <60 years compared to the reference group of patients aged ≥60 years for each of the outcomes listed. Multivariable analyses are, where appropriate, adjusted for gender, diabetes duration, smoking, estimated glomerular filtration rates, body mass index and HbA1c. Hypertension is defined as systolic blood pressure >140mmHg and/or diastolic blood pressure >90 mmHg. Dyslipidaemia is defined as either total cholesterol >4.0 mmol/L, high density lipoprotein <1.0 mmol/L, low density lipoprotein >2.0 mmol/L or triglycerides >2.0 mmol/L. Obesity is defined as Body Mass Index >30 kg/m<sup>2</sup>.

**Figure 2:** Blood pressure (i) and lipid management (ii) gaps in patients with type 2 diabetes

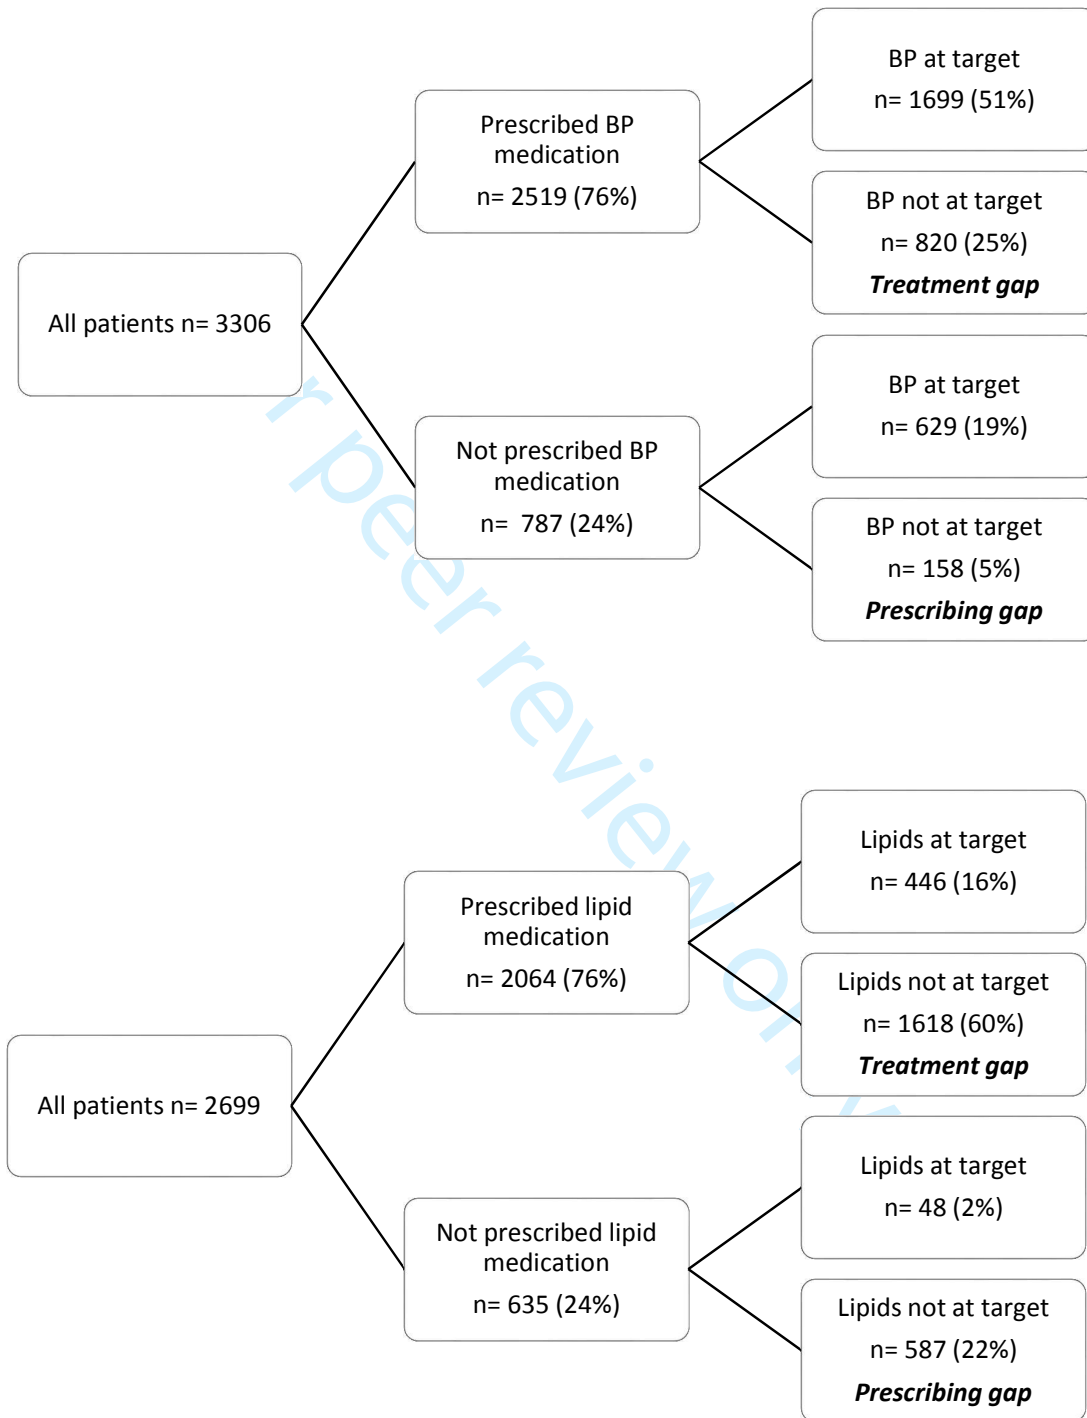

## Supplementary Tables

**Suppl. Table 1:** Number of participating diabetes centres and patients by state or territory

| State/Territory              | Participating centres | Number of patients included |
|------------------------------|-----------------------|-----------------------------|
| Australian Capital Territory | 1                     | 49                          |
| New South Wales              | 13                    | 1246                        |
| Northern Territory           | 1                     | 91                          |
| Queensland                   | 9                     | 758                         |
| South Australia              | 1                     | 44                          |
| Tasmania                     | 3                     | 140                         |
| Victoria                     | 20                    | 1119                        |
| Western Australia            | 1                     | 45                          |
| Total                        | 49                    | 3492                        |

**Suppl. Table 2:** Unadjusted and adjusted odds of variables associated with prescribing gaps

|                                          | <b>HbA1c &gt; 8.0% and not on insulin</b> |         |                        |         | <b>Hypertension and not on BP medication</b> |         |                        |         | <b>Dyslipidaemia and not on lipid medication</b> |         |                        |         |
|------------------------------------------|-------------------------------------------|---------|------------------------|---------|----------------------------------------------|---------|------------------------|---------|--------------------------------------------------|---------|------------------------|---------|
|                                          | Univariable Analysis                      |         | Multivariable Analysis |         | Univariable Analysis                         |         | Multivariable Analysis |         | Univariable Analysis                             |         | Multivariable Analysis |         |
|                                          | OR<br>(95%CI)                             | p value | OR<br>(95%CI)          | p value | OR<br>(95%CI)                                | p value | OR<br>(95%CI)          | p value | OR<br>(95%CI)                                    | p value | OR<br>(95%CI)          | p value |
| <b>Age (y)</b>                           |                                           |         |                        |         |                                              |         |                        |         |                                                  |         |                        |         |
| ≥60 (ref)                                |                                           |         |                        |         |                                              |         |                        |         |                                                  |         |                        |         |
| <60                                      | 1.23<br>(1.01-1.50)                       | 0.041   | 0.80<br>(0.61-1.04)    | 0.090   | 2.71<br>(1.91-3.83)                          | <0.001  | 1.84<br>(1.16-2.92)    | 0.010   | 2.17<br>(1.79-2.63)                              | <0.001  | 1.48<br>(1.15-1.90)    | 0.002   |
| <b>Duration of Diabetes (y)</b>          |                                           |         |                        |         |                                              |         |                        |         |                                                  |         |                        |         |
| <10 (ref)                                |                                           |         |                        |         |                                              |         |                        |         |                                                  |         |                        |         |
| ≥10                                      | 0.28<br>(0.23-0.35)                       | <0.001  | 0.28<br>(0.22-0.36)    | <0.001  | 0.39<br>(0.28-0.56)                          | <0.001  | 0.46<br>(0.29-0.71)    | 0.001   | 0.41<br>(0.34-0.50)                              | <0.001  | 0.54<br>(0.42-0.69)    | <0.001  |
| <b>Gender</b>                            |                                           |         |                        |         |                                              |         |                        |         |                                                  |         |                        |         |
| Male (ref)                               |                                           |         |                        |         |                                              |         |                        |         |                                                  |         |                        |         |
| Female                                   | 0.89<br>(0.73-1.08)                       | 0.239   | 0.87<br>(0.69-1.11)    | 0.260   | 0.96<br>(0.68-1.36)                          | 0.818   | 0.97<br>(0.62-1.51)    | 0.890   | 1.37<br>(1.13-1.66)                              | 0.001   | 1.19<br>(0.93-1.51)    | 0.160   |
| <b>Smoking</b>                           |                                           |         |                        |         |                                              |         |                        |         |                                                  |         |                        |         |
| Never (ref)                              |                                           |         |                        |         |                                              |         |                        |         |                                                  |         |                        |         |
| Past                                     | 0.83<br>(0.66-1.05)                       | 0.117   |                        |         | 0.57<br>(0.38-0.86)                          | 0.008   | 0.66<br>(0.41-1.09)    | 0.103   | 0.71<br>(0.57-0.90)                              | 0.005   | 0.76<br>(0.59-0.99)    | 0.043   |
| Current                                  | 0.97<br>(0.71-1.33)                       | 0.861   |                        |         | 1.57<br>(0.94-2.64)                          | 0.087   | 1.40<br>(0.74-2.65)    | 0.301   | 1.06<br>(0.78-1.44)                              | 0.711   | 1.03<br>(0.73-1.46)    | 0.856   |
| <b>eGFR (ml/min) (per unit)</b>          | 1.01<br>(1.00-1.01)                       | 0.001   | 1.00<br>(1.00-1.01)    | 0.049   | 1.02<br>(1.01-1.02)                          | <0.001  | 1.01<br>(1.00-1.01)    | 0.012   | 1.01<br>(1.01-1.01)                              | <0.001  | 1.01<br>(1.00-1.01)    | 0.005   |
| <b>BMI (kg/m<sup>2</sup>) (per unit)</b> | 0.98<br>(0.97-1.00)                       | 0.021   | 0.98<br>(0.96-0.99)    | 0.004   | 0.98<br>(0.96-1.00)                          | 0.100   | 0.95<br>(0.93-0.98)    | 0.002   | 0.99<br>(0.98-1.01)                              | 0.238   |                        |         |
| <b>HbA1c (%) (per unit)</b>              |                                           |         |                        |         | 1.05<br>(0.95-1.16)                          | 0.331   |                        |         | 0.98<br>(0.93-1.04)                              | 0.497   |                        |         |
| <b>Vascular disease</b>                  |                                           |         |                        |         |                                              |         |                        |         |                                                  |         |                        |         |
| No (ref)                                 |                                           |         |                        |         |                                              |         |                        |         |                                                  |         |                        |         |
| Yes                                      |                                           |         |                        |         | 0.37<br>(0.26-0.53)                          | <0.001  | 0.48<br>(0.31-0.75)    | 0.001   | 0.36<br>(0.29-0.44)                              | <0.001  | 0.51<br>(0.40-0.66)    | <0.001  |

\*Multivariable analyses are, where appropriate, adjusted for gender, diabetes duration, smoking, estimated glomerular filtration rates, body mass index and HbA1c.

#Hypertension is defined as systolic blood pressure >140mmHg and/or diastolic blood pressure >90 mmHg

†Dyslipidaemia is defined as either total cholesterol >4.0 mmol/L, high density lipoprotein <1.0 mmol/L, low density lipoprotein >2.0 mmol/L or triglycerides >2.0 mmol/L

**Suppl. Table 3:** Unadjusted and adjusted odds of variables associated with suboptimal glycaemic control and adverse cardiovascular risk factor levels, excluding patients with diabetes duration ≤ 2 years.

|                                                   | <b>HbA1c above target (7.0%, 53 mmol/mol)</b> |         |                        |         | <b>Hypertension</b>  |         |                        |         | <b>Dyslipidaemia</b> |         |                        |         | <b>Obesity</b>       |         |                        |         | <b>Current Smoker</b> |         |                        |         |
|---------------------------------------------------|-----------------------------------------------|---------|------------------------|---------|----------------------|---------|------------------------|---------|----------------------|---------|------------------------|---------|----------------------|---------|------------------------|---------|-----------------------|---------|------------------------|---------|
|                                                   | Univariable Analysis                          |         | Multivariable Analysis |         | Univariable Analysis |         | Multivariable Analysis |         | Univariable Analysis |         | Multivariable Analysis |         | Univariable Analysis |         | Multivariable Analysis |         | Univariable Analysis  |         | Multivariable Analysis |         |
|                                                   | OR (95%CI)                                    | p value | OR (95%CI)             | p value | OR (95%CI)           | p value | OR (95%CI)             | p value | OR (95%CI)           | p value | OR (95%CI)             | p value | OR (95%CI)           | p value | OR (95%CI)             | p value | OR (95%CI)            | p value | OR (95%CI)             | p value |
| <b>Age</b>                                        |                                               |         |                        |         |                      |         |                        |         |                      |         |                        |         |                      |         |                        |         |                       |         |                        |         |
| ≥60 y (ref)                                       |                                               |         |                        |         |                      |         |                        |         |                      |         |                        |         |                      |         |                        |         |                       |         |                        |         |
| <60 y                                             | 1.47 (1.22-1.77)                              | <0.001  | 1.59 (1.27-2.00)       | <0.001  | 0.88 (0.74-1.04)     | 0.122   | 0.90 (0.72-1.12)       | 0.339   | 2.17 (1.71-2.76)     | <0.001  | 1.89 (1.41-2.53)       | <0.001  | 1.31 (1.11-1.54)     | 0.001   | 1.28 (1.06-1.55)       | 0.010   | 2.50 (1.96-3.17)      | <0.001  | 2.19 (1.64-2.92)       | <0.001  |
| <b>Duration</b>                                   |                                               |         |                        |         |                      |         |                        |         |                      |         |                        |         |                      |         |                        |         |                       |         |                        |         |
| <10 y (ref)                                       |                                               |         |                        |         |                      |         |                        |         |                      |         |                        |         |                      |         |                        |         |                       |         |                        |         |
| ≥10 y                                             | 1.65 (1.37-1.98)                              | <0.001  | 2.05 (1.66-2.54)       | <0.001  | 1.10 (0.92-1.31)     | 0.295   |                        |         | 0.80 (0.63-1.01)     | 0.065   | 0.93 (0.70-1.25)       | 0.631   | 1.02 (0.86-1.21)     | 0.793   |                        |         | 0.71 (0.55-0.92)      | 0.009   | 1.00 (0.75-1.35)       | 0.983   |
| <b>Sex</b>                                        |                                               |         |                        |         |                      |         |                        |         |                      |         |                        |         |                      |         |                        |         |                       |         |                        |         |
| Male (ref)                                        |                                               |         |                        |         |                      |         |                        |         |                      |         |                        |         |                      |         |                        |         |                       |         |                        |         |
| Female                                            | 1.18 (0.99-1.40)                              | 0.062   | 1.18 (0.97-1.44)       | 0.093   | 1.05 (0.90-1.23)     | 0.555   | 0.96 (0.78-1.17)       | 0.657   | 0.75 (0.61-0.92)     | 0.006   | 0.70 (0.54-0.90)       | 0.006   | 1.29 (1.11-1.50)     | 0.001   | 1.35 (1.12-1.62)       | 0.001   | 0.74 (0.58-0.94)      | 0.015   | 0.77 (0.59-1.01)       | 0.060   |
| <b>Smoking</b>                                    |                                               |         |                        |         |                      |         |                        |         |                      |         |                        |         |                      |         |                        |         |                       |         |                        |         |
| Never (ref)                                       |                                               |         |                        |         |                      |         |                        |         |                      |         |                        |         |                      |         |                        |         |                       |         |                        |         |
| Past                                              | 1.08 (0.88-1.32)                              | 0.484   |                        |         | 0.92 (0.77-1.11)     | 0.387   | 0.97 (0.78-1.19)       | 0.748   | 1.08 (0.85-1.37)     | 0.539   | 0.97 (0.74-1.28)       | 0.853   | 1.51 (1.26-1.81)     | <0.001  | 1.69 (1.38-2.06)       | <0.001  |                       |         |                        |         |
| Current                                           | 1.22 (0.89-1.66)                              | 0.215   |                        |         | 0.68 (0.51-0.90)     | 0.006   | 0.74 (0.53-1.02)       | 0.062   | 1.46 (0.99-2.17)     | 0.058   | 1.18 (0.77-1.81)       | 0.446   | 0.95 (0.74-1.23)     | 0.712   | 0.90 (0.69-1.19)       | 0.468   |                       |         |                        |         |
| <b>eGFR (ml/min/1.73m<sup>2</sup>) (per unit)</b> | 1.00 (1.00-1.01)                              | 0.002   | 1.00 (1.00-1.01)       | 0.014   | 1.00 (0.99-1.00)     | 0.005   | 1.00 (0.99-1.00)       | 0.011   | 1.00 (1.00-1.00)     | 0.655   |                        |         | 1.00 (1.00-1.00)     | 0.175   |                        |         | 1.01 (1.01-1.01)      | <0.001  | 1.01 (1.00-1.01)       | 0.001   |
| <b>BMI (kg/m<sup>2</sup>) (per unit)</b>          | 1.03 (1.02-1.05)                              | <0.001  | 1.03 (1.02-1.05)       | <0.001  | 1.02 (1.01-1.03)     | <0.001  | 1.02 (1.00-1.03)       | 0.009   | 1.02 (1.00-1.04)     | 0.013   | 1.02 (1.00-1.03)       | 0.097   |                      |         |                        |         | 0.98 (0.96-1.00)      | 0.016   | 0.96 (0.95-0.98)       | <0.001  |
| <b>HbA1c (%) (per unit)</b>                       |                                               |         |                        |         | 1.04 (1.00-1.09)     | 0.075   | 1.02 (0.97-1.08)       | 0.477   | 1.21 (1.12-1.29)     | <0.001  | 1.14 (1.05-1.23)       | 0.002   | 1.09 (1.04-1.14)     | <0.001  | 1.05 (1.00-1.11)       | 0.040   |                       |         |                        |         |

\*Multivariable analyses are, where appropriate, adjusted for gender, diabetes duration, smoking, estimated glomerular filtration rates, body mass index and HbA1c.

#Hypertension is defined as systolic blood pressure >140mmHg and/or diastolic blood pressure >90 mmHg

†Dyslipidaemia is defined as either total cholesterol >4.0 mmol/L, high density lipoprotein <1.0 mmol/L, low density lipoprotein >2.0 mmol/L or triglycerides >2.0 mmol/L

‡Obesity is defined as Body Mass Index >30 kg/m<sup>2</sup>

# BMJ Open

## Age related differences in glycaemic control, cardiovascular disease risk factors and treatment in patients with type 2 diabetes: a cross-sectional study from the Australian National Diabetes Audit

|                                 |                                                                                                                                                                                                                                                                                                                                                                                                                                                                                                                                                                                                                                                                                                                                                                                                                                                                                         |
|---------------------------------|-----------------------------------------------------------------------------------------------------------------------------------------------------------------------------------------------------------------------------------------------------------------------------------------------------------------------------------------------------------------------------------------------------------------------------------------------------------------------------------------------------------------------------------------------------------------------------------------------------------------------------------------------------------------------------------------------------------------------------------------------------------------------------------------------------------------------------------------------------------------------------------------|
| Journal:                        | <i>BMJ Open</i>                                                                                                                                                                                                                                                                                                                                                                                                                                                                                                                                                                                                                                                                                                                                                                                                                                                                         |
| Manuscript ID                   | bmjopen-2017-020677.R1                                                                                                                                                                                                                                                                                                                                                                                                                                                                                                                                                                                                                                                                                                                                                                                                                                                                  |
| Article Type:                   | Research                                                                                                                                                                                                                                                                                                                                                                                                                                                                                                                                                                                                                                                                                                                                                                                                                                                                                |
| Date Submitted by the Author:   | 14-Mar-2018                                                                                                                                                                                                                                                                                                                                                                                                                                                                                                                                                                                                                                                                                                                                                                                                                                                                             |
| Complete List of Authors:       | Nanayakkara, Natalie; Monash University, School of Public Health and Preventive Medicine<br>Ranasinha, Sanjeeva; Monash University, Faculty of Medicine, Nursing & Health Sciences<br>Gadowski, Adelle; Monash University, School of Public Health and Preventive Medicine<br>Davis, Wendy; University of Western Australia, Fremantle Hospital, School of Medicine and Pharmacology<br>Flack, Jeffrey; Bankstown-Lidcombe Hospital, Diabetes Centre; University of New South Wales - Randwick Campus, Faculty of Medicine<br>Wischer, Natalie; National Association of Diabetes Centres<br>Andrikopoulos, Sof; University of Melbourne, Department of Medicine (AH)<br>Zoungas, Sophia; Monash University, . Monash Centre for Health Research and Implementation-MCHRI, School of Public Health and Preventive Medicine; University of Sydney, The George Institute for Global Health |
| <b>Primary Subject Heading</b>: | Diabetes and endocrinology                                                                                                                                                                                                                                                                                                                                                                                                                                                                                                                                                                                                                                                                                                                                                                                                                                                              |
| Secondary Subject Heading:      | Epidemiology                                                                                                                                                                                                                                                                                                                                                                                                                                                                                                                                                                                                                                                                                                                                                                                                                                                                            |
| Keywords:                       | General diabetes < DIABETES & ENDOCRINOLOGY, EPIDEMIOLOGY, GENERAL MEDICINE (see Internal Medicine)                                                                                                                                                                                                                                                                                                                                                                                                                                                                                                                                                                                                                                                                                                                                                                                     |
|                                 |                                                                                                                                                                                                                                                                                                                                                                                                                                                                                                                                                                                                                                                                                                                                                                                                                                                                                         |

SCHOLARONE™  
Manuscripts

1  
2  
3 **Age related differences in glycaemic control, cardiovascular disease risk factors**  
4  
5 **and treatment in patients with type 2 diabetes: a cross-sectional study from the**  
6  
7 **Australian National Diabetes Audit**  
8  
9

10  
11 Natalie Nanayakkara<sup>1,2</sup>, Sanjeeva Ranasinha<sup>1</sup>, Adelle M Gadowski<sup>2</sup>, Wendy Davis<sup>3</sup>, Jeff R Flack<sup>4,5,6</sup>, Natalie  
12 Wischer<sup>7</sup>, Sofianos Andrikopoulos<sup>8</sup>, Sophia Zoungas<sup>1,2,9</sup>  
13  
14

15  
16  
17 **Affiliations**

- 18  
19 1. Monash Centre for Health Research and Implementation – MCHRI, School Public Health and  
20 Preventive Medicine, Monash University in partnership with Monash Health, Locked Bag 29, Clayton,  
21 VIC 3168, Australia  
22  
23 2. Department of Epidemiology and Preventive Medicine, School of Public Health and Preventive  
24 Medicine, Monash University, The Alfred Centre, 99 Commercial Road, Melbourne VIC 3004  
25  
26 3. School of Medicine and Pharmacology, University of Western Australia, Fremantle Hospital, PO Box  
27 480, Fremantle, Western Australia 6959, Australia  
28  
29 4. Diabetes Centre, Bankstown-Lidcombe Hospital, Bankstown, NSW, Australia  
30  
31 5. Faculty of Medicine, University of NSW, Sydney NSW, Australia  
32  
33 6. School of Medicine, Western Sydney University, Sydney, NSW, Australia  
34  
35 7. National Association of Diabetes Centres, Sydney, NSW 2000 Australia  
36  
37 8. Australian Diabetes Society, Sydney, NSW 2000 Australia  
38  
39 9. The George Institute for Global Health, Camperdown, NSW 2050 Australia  
40  
41  
42  
43

44 **Corresponding Author**

45  
46  
47 Professor Sophia Zoungas

48  
49  
50 School of Public Health and Preventive Medicine, Monash University

51  
52  
53 Tel.: +61 3 9594 7500; Fax: +61 3 9594 7554

54  
55  
56 E-mail: [sophia.zoungas@monash.edu](mailto:sophia.zoungas@monash.edu)  
57

## Abstract

**Objective:** To compare the glycaemic control and cardiovascular risk factor profiles of younger and older patients with type 2 diabetes. Cross-sectional analysis of data from the 2015 Australian National Diabetes Audit (ANDA) was undertaken.

**Methods:** Data were obtained from adults with type 2 diabetes presenting to Australian secondary/tertiary diabetes centres. Logistic regression examined associations with HbA1c >7% (53 mmol/mol) and cardiovascular risk factors.

**Results:** Data from 3,492 patients were analysed. Mean ( $\pm$ SD) age was 62.9 $\pm$ 12.5 years, mean diabetes duration 13.5 $\pm$ 9.4 years and mean HbA1c 8.2 $\pm$ 1.8%. Mean HbA1c was 8.6 $\pm$ 2.1% and 8.0 $\pm$ 1.6% for the younger (<60 years) and older subgroups ( $\geq$ 60 years) respectively ( $p<0.001$ ). The odds (aOR) of HbA1c above >7.0% was 1.5 times higher (95%CI 1.22-1.84) for younger patients compared with older patients after adjustment for gender, smoking, diabetes duration, renal function and body mass index. Younger patients were also more likely to have dyslipidaemia (aOR 2.02 [1.53-2.68],  $p<0.001$ ), be obese (aOR 1.25 [1.05-1.49]),  $p<0.001$ ) and be current smokers (aOR 2.13 [1.64-2.77],  $p<0.001$ ) than older patients.

**Conclusions:** Younger age was associated with poorer glycaemic control and adverse cardiovascular risk factor profiles. It is imperative to optimise and monitor treatment in order to improve long-term outcomes.

**Strengths and limitations of this study:**

- large dataset of patients from a nation-wide survey
- information on a broad range of variables with potential impact on glycaemic, blood pressure and lipid control



1  
2  
3  
4  
5  
6  
7  
8  
9  
10  
11  
12  
13  
14  
15  
16  
17  
18  
19  
20  
21  
22  
23  
24  
25  
26  
27  
28  
29  
30  
31  
32  
33  
34  
35  
36  
37  
38  
39  
40  
41  
42  
43  
44  
45  
46  
47  
48  
49  
50  
51  
52  
53  
54  
55  
56  
57  
58  
59  
60

- We were unable to conduct longitudinal analyses as the data were de-identified and the cross-sectional nature of the analysis precluded investigation of causality.
- Study population may largely represent a specialist referred patient group as the majority of patients were receiving care at tertiary diabetes centres

For peer review only

## 1. Introduction

Driven by ageing populations, increasing obesity and decreasing physical activity, the prevalence of diabetes is expected to rise by 55% to 592 million individuals worldwide by 2035(1). Traditionally a disease of middle and older age, type 2 diabetes is increasingly diagnosed in younger patients (2, 3). Diabetes and its complications contribute to 10% of Australian deaths (4) and 8.4 % of deaths worldwide (5).

The US National Health and Nutrition Examination Survey (NHANES) indicated that the prevalence of type 2 diabetes has increased by 70% in people aged 20-44 years in the last three decades, making younger adults the fastest growing group of people with type 2 diabetes (6). Diabetes complications are related to duration and degree of glycaemic control (7), thus younger people with diabetes who start their hyperglycaemic exposure at an earlier age may be at highest risk for end-organ damage. However, few studies have compared glycaemic control in younger and older patients with type 2 diabetes (8, 9). Further, these studies were largely conducted within selected trial cohorts (and as such the patients examined may differ from community based cohorts) and have reported variable findings of better glycaemic control in older patients (10), in younger patients (11) or no effect of age (12).

We hypothesised that there may be age-related differences in the management of patients with type 2 diabetes, which may contribute to excess cardiovascular risk in younger patients. This study investigates differences in the achieved levels and management of (1) glycaemic control and (2) cardiovascular risk factors between younger and older patients with type 2 diabetes.

## 2. Methods

### 2.1 Participants

This national, cross-sectional study examined de-identified data from the 2015 Australian National Diabetes Audit (ANDA) (13). Participants were adult patients with type 2 diabetes, presenting to one of 49 nationally accredited diabetes centres. De-identified data were sourced from a range of diabetes centres located in the community/primary care (n=16) and secondary care (n=33), with patients under the care of endocrinologists, general specialists and local general practitioners. The state and territory location of participating sites is presented in Appendix 1. Information was collected regarding all consecutive patients attending a participating diabetes centre during the one-month survey period (May or June 2015). The Australian National Diabetes Audit has received approval from the Monash Health Human Research Ethics Committee.

### 2.2 Variables

Pre-specified demographic (gender, date of birth) and clinical variables (diabetes complications, comorbid conditions, blood pressure (BP), glycated haemoglobin A1c (HbA1c), body mass index (BMI), smoking status, medications) were collected for patients with type 2 diabetes. Health professionals from participating centres examined patients, reviewed medical records including pathology results and recorded the information in a standardised data collection form. All missing data, invalid entries and discrepancies were clarified with the patients' treating centres. As per the a priori analysis plan, age at survey was calculated as date of survey (2015) minus date of birth and categorised as <60 years or  $\geq 60$  years, diabetes duration was calculated as date of survey minus date of diabetes diagnosis and categorised as <10 years or  $\geq 10$  years. Height and weight were measured to calculate BMI. Smoking status was categorised as never, previous or current. Recent

1  
2  
3 pathology results (within the last 12 months) were recorded for total cholesterol (TC), low  
4 density lipoprotein (LDL), high density lipoprotein (HDL), triglycerides (TG), HbA1c and  
5 serum creatinine; calculated estimated glomerular filtration rate (eGFR) was calculated using  
6 the Modification of Diet in Renal Disease Study (MDRD) equation (14).  
7  
8  
9  
10

### 11 12 13 14 *2.3 Outcomes*

15 The main outcome variables were HbA1c (categorised as >7.0%, 53 mmol/mol),  
16 hypertension (defined as >140 and/or 90 mmHg), dyslipidaemia (defined as either TC>4.0  
17 mmol/L, HDL<1.0 mmol/L, LDL>2.0 mmol/L or Tg>2.0 mmol/L), obesity (defined as  
18 BMI>30 kg/m<sup>2</sup>) and smoker (categorised as never, past or current). The targets were based on  
19 the current Australian recommendations for people with diabetes as per the Australian Heart  
20 Foundation (15).  
21  
22  
23  
24  
25  
26  
27  
28  
29  
30  
31  
32

### 33 34 *2.4 Statistical analysis*

35 Categorical variables were summarised as percentages and differences between subgroups  
36 analysed using  $\chi^2$  test. Continuous variables were tested for normality to determine the most  
37 appropriate method for statistical analysis (parametric or non-parametric) and reported as  
38 means with standard deviations (SD) or as medians with interquartile ranges (IQR). Subgroup  
39 analyses were performed using ANOVA for normally distributed data and Mann-Whitney U  
40 tests for non-normally distributed data as appropriate. Logistic regression was used to  
41 examine factors (current age, diabetes duration, gender, smoking, calculated eGFR, BMI)  
42 associated with HbA1c, hypertension, dyslipidaemia and obesity (as the categories defined  
43 above). The selection of variables was based on identifying all measured clinical variables of  
44 known or suspected prognostic importance for the outcomes of interest and/or exhibiting a p  
45  
46  
47  
48  
49  
50  
51  
52  
53  
54  
55  
56  
57  
58  
59  
60

1  
2  
3 value  $\leq 0.10$  on univariable analysis. All potential confounding variables were included in the  
4  
5 multivariable models. Subgroup analyses were conducted to examine the effect of treatments  
6  
7 (yes or no) including insulin, antihypertensive therapy and lipid lowering therapy in patients  
8  
9 above the glycaemic, lipid and BP targets. A prescribing gap was defined as patients who  
10  
11 were not prescribed the relevant medications despite being above the recommended targets.  
12  
13 A treatment gap was defined as patients who were above the recommended targets despite  
14  
15 being on treatment. A sensitivity analysis examined the effect of excluding patients with less  
16  
17 than 2 years diabetes duration, who may have not yet had opportunity to modify treatment  
18  
19 and achieve targets and 2) examine the effect of centre type (community/primary and  
20  
21 secondary care) or clustering by centre. Patients were excluded from a particular analysis  
22  
23 when data relevant to that analysis were missing, but were not excluded from other analyses  
24  
25 where appropriate information was provided. Missing data of variables was less than 10%  
26  
27 and not imputed. A two-sided significance level of 0.05 was considered statistically  
28  
29 significant. All analyses were performed using Stata software version 14.2 (StataCorp, Texas,  
30  
31 USA).  
32  
33  
34  
35  
36

### 37 *2.5 Patient and Public Involvement*

38  
39 This research has been reviewed by the ANDA scientific advisory committee, which consists  
40  
41 of clinical and public representatives with an interest in best practice diabetes health care.  
42  
43  
44  
45

## 46 3. Results

### 47 *3.1 Overall*

48  
49 Data from 3,492 patients (>18 years of age) were analysed. Patients from all states and  
50  
51 territories were included (Suppl. Table 1). Younger patients (<60 years) accounted for 38%  
52  
53 (n=1,328) of patients. The clinical characteristics of these patients, stratified by age, are  
54  
55  
56  
57

1  
2  
3 shown in Table 1. The mean ( $\pm$ SD) age of the whole group was 62.9 $\pm$ 12.5 years and the  
4  
5 mean ages of the younger and older age groups were 50.1  $\pm$ 8.4 years and 70.7  $\pm$ 7.0 years  
6  
7 respectively. Mean diabetes duration was 9.6 $\pm$ 7.5 years for the younger age group and  
8  
9 15.9 $\pm$ 9.6 years for the older age group ( $p$ <0.001). There was a higher proportion of male  
10  
11 patients in the older (56.5%) compared with the younger age group (49.5%,  $p$ <0.001). The  
12  
13 majority of patients (64.9%) were treated at tertiary hospitals followed by community or  
14  
15 primary care centres (35.1%). Australian birth was reported by 68.1% of the younger age  
16  
17 group and 62.4% of the older age group ( $p$ =0.001). Microvascular and macrovascular  
18  
19 complications were prevalent in 35.3% and 21.6% of the younger age group and 49.3% and  
20  
21 43.4% of the older age group respectively ( $p$ <0.001 for both).  
22  
23

### 24 3.2 Glycaemic control

25  
26 Mean HbA1c was 8.2 $\pm$ 1.8% for the group overall, 8.6 $\pm$ 2.1% and 8.0 $\pm$ 1.6% for the younger  
27  
28 and older age groups respectively ( $p$ <0.001). A greater proportion of patients in the younger  
29  
30 age group had an HbA1c above 7.0% compared with the older age group (Table 1, Figure 1).  
31  
32 On univariable analysis, age, diabetes duration, gender, smoking and BMI were all associated  
33  
34 with an HbA1c above 7.0%. The unadjusted and adjusted odds ratios [95%CI] for HbA1c  
35  
36 above 7.0% were 1.26 [1.07-1.49],  $p$ <0.001 and 1.50 [1.22-1.84],  $p$ <0.001 respectively for  
37  
38 younger patients compared with older patients (Table 2, Figure 1).  
39  
40  
41  
42  
43

44 Glycaemic management was reported as diet only by 4%, oral agents by 77%, non-insulin  
45  
46 injectable therapy by 5% and insulin alone or in combination with oral agents by 61% of  
47  
48 patients. Compared with older patients, younger patients were equally likely to not be on  
49  
50 insulin treatment despite an HbA1c >8.0%, after adjusting for gender, diabetes duration, renal  
51  
52 function and BMI (Suppl. Table 2).  
53  
54  
55  
56  
57

### 3.3 Hypertension

Mean systolic blood pressure (BP) was  $130 \pm 18$  mmHg and  $134 \pm 18$  mmHg for the younger and older age groups respectively ( $p < 0.001$ ). A smaller proportion of patients in the younger age group were hypertensive compared with the older age group (Table 1, Figure 1). Younger patients were less likely to be hypertensive compared with older patients (unadjusted OR 0.81 [0.70-0.95]  $p = 0.008$ ). However, after adjusting for gender, smoking, renal function and BMI this effect was no longer significant (adjusted OR 0.85 [0.70-1.04],  $p = 0.119$ ) (Table 2).

The overall study population prescribing and treatment gaps for hypertension were 5% and 25% respectively (Figure 2). Younger patients who were hypertensive were more likely to not be on blood pressure lowering medication (prescribing gap) than older patients who were hypertensive (adjusted OR 1.84 [1.16-2.92],  $p = 0.002$ ) (Suppl. Table 2). There were no differences noted in the prescribing and treatment gaps for hypertension when male and female patients were considered separately (data not shown).

### 3.4 Dyslipidaemia

The majority of patients in both age groups had abnormal lipid profiles but a greater proportion of patients in the younger than older age group had dyslipidaemia (Table 1, Figure 1). On univariable analysis, age, diabetes duration, gender, smoking, BMI and HbA1c were associated with dyslipidaemia. The unadjusted and adjusted odds ratios [95%CI] for dyslipidaemia were 2.41 [1.91-3.03],  $p < 0.001$  and 2.02 [1.53-2.68],  $p < 0.001$  respectively for younger patients compared with older patients (Table 2).

1  
2  
3 The overall study population prescribing and treatment gaps for dyslipidaemia were 22% and  
4 60% respectively (Figure 2). Younger patients with dyslipidaemia were more likely to not be  
5 on lipid lowering medication (prescribing gap) than older patients with dyslipidaemia after  
6 adjustment for diabetes duration, gender, smoking, renal function and vascular disease  
7 (adjusted OR 1.48 [1.15-1.90],  $p = 0.002$ ) (Suppl. Table 2). There were no differences noted  
8 in the prescribing and treatment gaps for dyslipidaemia when male and female patients were  
9 considered separately (data not shown).  
10  
11  
12  
13  
14  
15  
16  
17  
18  
19  
20  
21

### 22 *3.5 Obesity*

23  
24 Mean BMI was  $34.5 \pm 8.4 \text{ kg/m}^2$  and  $32.4 \pm 6.7 \text{ kg/m}^2$  for the younger and older age groups  
25 respectively ( $p < 0.001$ ). A greater proportion of patients in the younger age group had a BMI  
26 in the obese category ( $>30 \text{ kg/m}^2$ ) compared with the older age group (Table 1, Figure 2). On  
27 univariable analysis, age, gender and smoking were all associated with obesity. The  
28 unadjusted and adjusted odds ratios for obesity were 1.26 [1.09-1.46],  $p = 0.002$  and 1.25  
29 [1.05-1.49],  $p = 0.002$  respectively for younger patients compared with older (Table 2).  
30  
31  
32  
33  
34  
35  
36  
37  
38  
39

### 40 *3.6 Smoking*

41  
42 A greater proportion of patients in the younger age group reported being a current smoker  
43 compared with older patients (Table 1, Figure 1). On univariable analysis, age, diabetes  
44 duration, gender, BMI and renal function were all associated with current smoking. The  
45 unadjusted and adjusted odds ratios for current smoking were 2.60 [2.09-3.22],  $p < 0.001$  and  
46 2.13 [1.64-2.77],  $p < 0.001$  respectively for younger patients compared with older patients  
47 (Table 2).  
48  
49  
50  
51  
52  
53  
54  
55  
56  
57  
58  
59  
60



### 3.7 Sensitivity analysis

When patients with diabetes duration of 2 years or less (who may have not yet had opportunity to modify treatment practices and achieve targets) were excluded the associations were unchanged. Younger patients were still more likely to have an HbA1c over 7.0% (adjusted OR 1.59 [1.27-2.00],  $p<0.001$ ), dyslipidaemia (adjusted OR 1.89 [1.41-2.53],  $p<0.001$ ), be obese (adjusted OR 1.28 [1.06-1.55],  $p=0.010$ ) and smokers (adjusted OR 2.19 [1.64-2.92],  $p<0.001$ ) than older patients after adjusting for diabetes duration, gender, renal function, BMI and HbA1c where appropriate (Suppl. Table 3). Furthermore, the associations were similar when we adjusted the models for centre type (Suppl. Table 4).

## 4. Discussion

In this large national cross-sectional study of community-living patients with type 2 diabetes, we found that younger patients with significantly shorter disease duration were less likely to achieve recommended targets for glycaemic control, blood pressure and lipids than older patients. Younger patients were also more likely to be obese and to smoke. Of patients not achieving glycaemic, blood pressure, and lipid targets, younger rather than older patients were more likely to not be on therapy after adjustment for other relevant confounders. These findings remained after exclusion of patients with more recent diabetes onset who may have been relatively new to diabetes services and not yet had opportunity to attain treatment targets.

It is not clear why younger patients demonstrate poorer glycaemic control than older patients. Some evidence suggests that early-onset type 2 diabetes may be a more aggressive phenotype than later-onset type 2 diabetes, representing a greater predisposition to beta cell failure and diagnosis at an earlier age (16). Since younger patients had higher rates of obesity compared

1  
2  
3 with older patients, this may have contributed to worsening insulin resistance, and a need for  
4  
5 greater intensification of therapy to achieve optimal glycaemic control. Longer duration of  
6  
7 diabetes is also known to be associated with poorer glycaemic control, possibly due to  
8  
9 progressive  $\beta$ -cell impairment and reduced insulin secretion (17), which in turn reduces the  
10  
11 effectiveness of diet alone or oral agents. However, in our study the younger age group had a  
12  
13 shorter diabetes duration than the older age group such that longer disease duration could not  
14  
15 explain the poorer glycaemic control.  
16  
17

18  
19  
20 The high prevalence of poor glycaemic control and adverse cardiovascular risk factors  
21  
22 observed in younger patients is of great concern as cardiovascular disease accounts for over  
23  
24 half of the mortality among people with type 2 diabetes (18, 19). Given the risk for  
25  
26 cardiovascular disease doubles when hypertension is also present in people with diabetes (20)  
27  
28 and over a quarter of the patients in the younger age group had either systolic or diastolic  
29  
30 hypertension, a review of the intensity of management is in order. This is supported by the  
31  
32 larger prescribing and treatment gaps observed in the younger rather than older patients. In  
33  
34 contrast, for older patients it is possible that clinicians' concerns regarding hypotension and  
35  
36 postural symptoms due to autonomic neuropathy may appropriately limit antihypertensive  
37  
38 use.  
39  
40  
41  
42  
43

44 Although the absolute differences in the lipid variables were not large between the younger  
45  
46 and older age groups, it is noteworthy that among younger patients and in line with other  
47  
48 international studies, 89% had abnormal lipids (21). High density cholesterol levels,  
49  
50 considered the best lipid predictor of cardiovascular disease (22), were significantly lower  
51  
52 and triglyceride levels significantly higher in younger patients compared with older patients  
53  
54 suggestive of inadequate lipid management. The relative insulin deficiency seen in type 2  
55  
56  
57  
58  
59  
60

1  
2  
3 diabetes is known to impair the action of lipoprotein lipase, resulting in lower HDL levels  
4 and higher triglyceride levels. However, the lower HDL and higher triglyceride observed in  
5 younger patients cannot be attributed solely to the effect of hyperglycaemia as younger age  
6 remained independently associated with dyslipidaemia when HbA1c was included in the  
7 multivariable model. Another possible explanation is survivor effect bias whereby patients  
8 with normal lipid levels have survived longer (and into the older age group) compared with  
9 those with dyslipidaemia.  
10  
11  
12  
13  
14  
15  
16  
17  
18  
19

20 It is recognised that estimates of absolute cardiovascular risk (even for those with diabetes)  
21 are driven predominantly by age rather than modifiable risk factors (23). Indeed, in our study  
22 the majority of patients in the younger age group would have low absolute cardiovascular risk  
23 despite significant risk factor burden. The Global Burden of Disease study reported that the  
24 maximum impact in terms of healthy life-years gained or disability adjusted life years averted  
25 with cardiovascular preventive therapies would be observed between 55-64 years (24).  
26  
27  
28  
29  
30  
31  
32

33 However, vascular complications develop over many decades from a young age (25), well  
34 before presentation with a potentially fatal event. Additionally, younger patients have higher  
35 modifiable risk (risk factors amenable to treatment) and longer future lifetime exposure for  
36 any particular absolute risk level when compared to older people. As highlighted by our  
37 findings, a major outstanding challenge is how best to implement use of evidence-based  
38 preventive therapies in younger patients and to effectively communicate risk of future events.  
39  
40  
41  
42  
43  
44  
45

46 Among newer approaches are the concepts of heart or vascular age (26) and of lifetime or  
47 modifiable risk, particularly in younger patients. This is consistent with the American College  
48 of Cardiology /American Heart Association (ACC/AHA) guidelines recommending  
49 assessment of lifetime risk in younger patients in addition to the traditional absolute risk  
50 assessment (27).  
51  
52  
53  
54  
55  
56  
57  
58  
59  
60

1  
2  
3  
4  
5 Other explanations for our findings include that younger patients may face more hurdles to  
6 glucose testing, regular physical activity, healthy diet, and medication adherence whereas  
7 older patients may access medical care more frequently, may be more motivated to manage  
8 their medical conditions and may be more compliant with diet and medications (28-30).

9  
10  
11  
12  
13 Further research is required to understand the barriers to better glycaemic control and  
14 cardiovascular risk profiles faced by younger patients. These data are crucial to inform  
15 strategies to assist weight reduction, lifestyle modification and escalation of glycaemic, anti-  
16 hypertensive and lipid lowering therapies. Such measures would particularly benefit younger  
17 patients with type 2 diabetes, given that the incidence of macrovascular complications and  
18 mortality increases with diabetes duration (7) and is reduced with management of glycaemia  
19 and cardiovascular risk factors (18, 19). Good glycaemic control earlier in the course of  
20 diabetes may also be imperative, as this is demonstrated to reduce complications in the long  
21 term (31).  
22  
23  
24  
25  
26  
27  
28  
29  
30  
31  
32  
33  
34

35 The proportion of patients with hypertension and dyslipidaemia in our study was similar to  
36 that reported in the population-based AusDiab study. However, the proportion of patients  
37 overall with an HbA1c target  $\leq 7.0\%$  was greater in our study than in the AusDiab study (32)  
38 and the community-based Fremantle Diabetes Study (8). In our study younger patients had  
39 poorer glycaemic control with a mean diabetes duration approximately half that of older  
40 patients. Higher HbA1c levels have previously been independently associated with younger  
41 age (8). In contrast, the Australian general practice based NEFRON study, found that younger  
42 and more obese patients with a longer duration of diabetes had poor glycaemic control (9).  
43  
44  
45  
46  
47  
48  
49  
50  
51  
52 The differences in these studies may be due to the varying sampling frames and population  
53 characteristics.  
54  
55  
56  
57  
58  
59  
60

1  
2  
3  
4  
5 Similar to other studies investigating gender differences in the management of type 2 diabetes,  
6  
7 we found that female patients were more likely to report poorer glycaemic control and higher  
8  
9 rates of obesity than males (33). However, contrary to other studies from Germany (34) and  
10  
11 Italy (35), male and female patients appeared to experience similar prescribing and treatment  
12  
13 gaps of hypertension and dyslipidaemia in Australia. This maybe due to due to cultural,  
14  
15 behavioural, psychosocial and/or socio-economic differences between these countries  
16  
17 affecting access to healthcare and uptake of preventive measures.  
18  
19  
20  
21

22 A strength of this analysis is the large dataset of patients from a nation-wide survey. Data  
23  
24 were sourced from over half of the centres registered with the National Association of  
25  
26 Diabetes centres (NADC) at the time. The participants of our study are likely to be similar to  
27  
28 patients attending diabetes clinics throughout Australia. We obtained information on a broad  
29  
30 range of variables with potential impact on glycaemic, blood pressure and lipid control. Study  
31  
32 limitations include that the majority of patients were receiving care at tertiary diabetes centres  
33  
34 and may largely represent a specialist referred patient group. Referral bias is also possible.  
35  
36 General practitioners may be more likely to refer younger patients whilst managing older  
37  
38 patients with shorter diabetes duration. Alternatively, older patients with longer diabetes  
39  
40 duration and interrelating co-morbid conditions may also be more likely to be referred to  
41  
42 specialist services. Another limitation was the reliance on self/healthcare worker reports as  
43  
44 we were unable to independently verify diagnoses and treatments. This is unlikely to change  
45  
46 the findings substantively, given previous studies have found approximately 90% of self-  
47  
48 reported diabetes information to be valid (36). We were unable to conduct longitudinal  
49  
50 analyses as the data were de-identified and the cross-sectional nature of the analysis  
51  
52 precluded investigation of causality.  
53  
54  
55  
56  
57  
58  
59  
60

## 5. Conclusion

In summary, younger patients with type 2 diabetes attending diabetes centres are burdened by poorer glycaemic control and cardiovascular risk factor profiles compared with older patients. Of patients not achieving glycaemic, blood pressure, and lipid targets, younger patients were significantly more likely to not be on therapy or be above target despite treatment than older patients. Younger patients with diabetes may benefit from more targeted, evidence-based, multi-disciplinary initiatives to achieve and maintain intensive glycaemic control and optimise cardiovascular risk factors. Such measures may minimise the incidence and severity of diabetes related complications in younger patients with type 2 diabetes, thereby reducing morbidity and mortality.

## Acknowledgements

We thank the participating diabetes centres for their time and generous contribution to the Australian National Diabetes Audit.

## Authors' Contributions

NN: study design, literature review, statistical analysis, critical discussion, drafting and revision of the manuscript

AG: statistical analysis, critical discussion, revision of the manuscript

SR: statistical analysis and interpretation of the data, revision of the manuscript

WD: critical revision of the manuscript

JF: critical revision of the manuscript

NW: study conception and design, revision of the manuscript

SA: study conception and design, critical revision of the manuscript

SZ: study conception and design, design of analyses, critical revision of the manuscript, supervision of the project.

The authors NN, SR, and SZ had full access to the data and take responsibility for the integrity of the data and accuracy of the analysis. All authors have read and approved the final manuscript.

## Funding

The Commonwealth Department of Health and Ageing funds the Australian National Diabetes Audit. This research has received no specific grant from any other funding agency in the public, commercial or not-for profit sectors.

## Data Sharing Statement

1  
2  
3 Application for datasets generated during and/or analysed during the current study may be  
4 considered by the corresponding author on reasonable request.  
5  
6

#### 7 Competing interests

8  
9  
10 W. Davis reports past participation in advisory boards and/or receiving honoraria from Novo  
11 Nordisk and Eli Lilly Australia. N. Wischer reports past participation in advisory boards  
12 and/or receiving honoraria from AstraZeneca Pty Ltd/, Eli Lilly Australia, Merck Sharp &  
13 Dohme (Australia) Pty Ltd, Sanofi Aventis Pty Ltd, Novo Nordisk. S Andrikopoulos reports  
14 past participation in advisory boards and/or receiving honoraria from GlaxoSmithKline Pty  
15 Ltd, Novartis Pty Ltd, AstraZeneca Pty Ltd/Bristol-Myers Squibb Australia Pty Ltd, Eli Lilly  
16 Australia, Janssen Cilag Pty Ltd, Merck Sharp & Dohme (Australia) Pty Ltd, Sanofi Aventis  
17 Pty Ltd, Novo Nordisk, Servier Laboratories Pty Ltd S Zoungas reports past participation in  
18 advisory boards/contract work on behalf of Monash University with AstraZeneca Pty Ltd,  
19 Merck Sharp & Dohme (Australia) Pty Ltd and Novo Nordisk Pty Ltd. S Zoungas holds a  
20 NHMRC senior research fellowship.  
21  
22  
23  
24  
25  
26  
27  
28  
29  
30  
31  
32  
33  
34  
35  
36  
37  
38  
39  
40  
41  
42  
43  
44  
45  
46  
47  
48  
49  
50  
51  
52  
53  
54  
55  
56  
57  
58  
59  
60



## References

1. Guariguata L, Whiting D, Hambleton I, Beagley J, Linnenkamp U, Shaw J. Global estimates of diabetes prevalence for 2013 and projections for 2035. *Diabetes research and clinical practice*. 2014;103(2):137-49.
2. Rahelic D. [7th Edition of Idf Diabetes Atlas--Call for Immediate Action]. *Lijecnicki vjesnik*. 2016;138(1-2):57-8.
3. Song SH, Hardisty CA. Early-onset Type 2 diabetes mellitus: an increasing phenomenon of elevated cardiovascular risk. *Expert Rev Cardiovasc Ther*. 2008;6(3):315-22.
4. Welfare ALoHa. Deaths from diabetes: Australian Institute of Health and Welfare; 2017 [cited 2017]. Available from: <http://www.aihw.gov.au/diabetes/deaths/>.
5. Group IDFDA. Update of mortality attributable to diabetes for the IDF Diabetes Atlas: estimates for the year 2011. *Diabetes Res Clin Pract*. 2013;100(2):277-9.
6. Menke A, Casagrande S, Geiss L, Cowie CC. Prevalence of and Trends in Diabetes Among Adults in the United States, 1988-2012. *Jama*. 2015;314(10):1021-9.
7. Zoungas S, Woodward M, Li Q, Cooper ME, Hamet P, Harrap S, et al. Impact of age, age at diagnosis and duration of diabetes on the risk of macrovascular and microvascular complications and death in type 2 diabetes. *Diabetologia*. 2014;57(12):2465-74.
8. Skinner TC, Bruce DG, Davis TM, Davis WA. Personality traits, self-care behaviours and glycaemic control in type 2 diabetes: the Fremantle diabetes study phase II. *Diabet Med*. 2014;31(4):487-92.
9. Macisaac RJ, Jerums G, Weekes AJ, Thomas MC. Patterns of glycaemic control in Australian primary care (NEFRON 8). *Internal medicine journal*. 2009;39(8):512-8.
10. El-Kebbi IM, Cook CB, Ziemer DC, Miller CD, Gallina DL, Phillips LS. Association of younger age with poor glycemic control and obesity in urban african americans with type 2 diabetes. *Archives of internal medicine*. 2003;163(1):69-75.
11. Smith NL, Heckbert SR, Bittner VA, Savage PJ, Barzilay JI, Dobs AS, et al. Antidiabetic treatment trends in a cohort of elderly people with diabetes. The cardiovascular health study, 1989-1997. *Diabetes care*. 1999;22(5):736-42.
12. Shorr RI, Franse LV, Resnick HE, Di Bari M, Johnson KC, Pahor M. Glycemic control of older adults with type 2 diabetes: findings from the Third National Health and Nutrition Examination Survey, 1988-1994. *Journal of the American Geriatrics Society*. 2000;48(3):264-7.
13. Health Do. Australian National Diabetes Audit (ANDA): Commonwealth of Australia; 2017 [updated 16 May 2017; cited 2017 17/6/2017]. Available from: <http://www.health.gov.au/internet/main/publishing.nsf/content/pq-diabetes-pubs>.
14. Levey AS, Bosch JP, Lewis JB, Greene T, Rogers N, Roth D. A more accurate method to estimate glomerular filtration rate from serum creatinine: a new prediction equation. Modification of Diet in Renal Disease Study Group. *Annals of internal medicine*. 1999;130(6):461-70.
15. O'Callaghan CJ, Rong P, Goh MY. National guidelines for the management of absolute cardiovascular disease risk. *Med J Aust*. 2014;200(8):454, 6.
16. Song SH, Hardisty CA. Early onset type 2 diabetes mellitus: a harbinger for complications in later years--clinical observation from a secondary care cohort. *Qjm*. 2009;102(11):799-806.
17. Saad MF, Knowler WC, Pettitt DJ, Nelson RG, Mott DM, Bennett PH. Sequential changes in serum insulin concentration during development of non-insulin-dependent diabetes. *Lancet*. 1989;1(8651):1356-9.
18. Cea Soriano L, Johansson S, Stefansson B, Rodriguez LA. Cardiovascular events and all-cause mortality in a cohort of 57,946 patients with type 2 diabetes: associations with renal function and cardiovascular risk factors. *Cardiovascular diabetology*. 2015;14:38.
19. Chen YY, Lin YJ, Chong E, Chen PC, Chao TF, Chen SA, et al. The impact of diabetes mellitus and corresponding HbA1c levels on the future risks of cardiovascular disease and mortality: a representative cohort study in Taiwan. *PloS one*. 2015;10(4):e0123116.

20. American Diabetes A. Treatment of hypertension in adults with diabetes. *Diabetes care*. 2002;25(1):199-201.
21. Hillier TA, Pedula KL. Characteristics of an adult population with newly diagnosed type 2 diabetes: the relation of obesity and age of onset. *Diabetes care*. 2001;24(9):1522-7.
22. Ingelsson E, Schaefer EJ, Contois JH, McNamara JR, Sullivan L, Keyes MJ, et al. Clinical utility of different lipid measures for prediction of coronary heart disease in men and women. *Jama*. 2007;298(7):776-85.
23. Zoungas S, Curtis A, Tonkin A, McNeil J. Statins in the elderly: an answered question? *Current opinion in cardiology*. 2014;29(4):372-80.
24. Murray CJ, Lauer JA, Hutubessy RC, Niessen L, Tomijima N, Rodgers A, et al. Effectiveness and costs of interventions to lower systolic blood pressure and cholesterol: a global and regional analysis on reduction of cardiovascular-disease risk. *Lancet*. 2003;361(9359):717-25.
25. Berenson GS, Srinivasan SR, Xu JH, Chen W. Adiposity and Cardiovascular Risk Factor Variables in Childhood Are Associated With Premature Death From Coronary Heart Disease in Adults: The Bogalusa Heart Study. *The American journal of the medical sciences*. 2016;352(5):448-54.
26. Vasan RS, Kannel WB. Strategies for cardiovascular risk assessment and prevention over the life course: progress amid imperfections. *Circulation*. 2009;120(5):360-3.
27. Goff DC, Jr., Lloyd-Jones DM, Bennett G, Coady S, D'Agostino RB, Sr., Gibbons R, et al. 2013 ACC/AHA guideline on the assessment of cardiovascular risk: a report of the American College of Cardiology/American Heart Association Task Force on Practice Guidelines. *Journal of the American College of Cardiology*. 2014;63(25 Pt B):2935-59.
28. Adekoya N. Patients seen in emergency departments who had a prior visit within the previous 72 h-National Hospital Ambulatory Medical Care Survey, 2002. *Public health*. 2005;119(10):914-8.
29. Bezie Y, Molina M, Hernandez N, Batista R, Niang S, Huet D. Therapeutic compliance: a prospective analysis of various factors involved in the adherence rate in type 2 diabetes. *Diabetes & metabolism*. 2006;32(6):611-6.
30. Ahmad NS, Ramli A, Islahudin F, Paraidathathu T. Medication adherence in patients with type 2 diabetes mellitus treated at primary health clinics in Malaysia. *Patient preference and adherence*. 2013;7:525-30.
31. Zoungas S, Chalmers J, Neal B, Billot L, Li Q, Hirakawa Y, et al. Follow-up of blood-pressure lowering and glucose control in type 2 diabetes. *The New England journal of medicine*. 2014;371(15):1392-406.
32. Tanamas S, Magliano D, Lynch BM, Willenberg L, Polkinghorne KR, Chadban S, et al. *AusDiab 2012. The Australian Diabetes, Obesity and Lifestyle Study*. Melbourne: Baker IDI Heart and Diabetes Institute; 2012.
33. Anand SS, Islam S, Rosengren A, Franzosi MG, Steyn K, Yusufali AH, et al. Risk factors for myocardial infarction in women and men: insights from the INTERHEART study. *Eur Heart J*. 2008;29(7):932-40.
34. Gouni-Berthold I, Berthold HK, Mantzoros CS, Bohm M, Krone W. Sex disparities in the treatment and control of cardiovascular risk factors in type 2 diabetes. *Diabetes Care*. 2008;31(7):1389-91.
35. Penno G, Solini A, Bonora E, Fondelli C, Orsi E, Zerbini G, et al. Gender differences in cardiovascular disease risk factors, treatments and complications in patients with type 2 diabetes: the RIACE Italian multicentre study. *J Intern Med*. 2013;274(2):176-91.
36. Kahn LB, Marshall JA, Baxter J, Shetterly SM, Hamman RF. Accuracy of reported family history of diabetes mellitus. Results from San Luis Valley Diabetes Study. *Diabetes care*. 1990;13(7):796-8.

## Tables and Figures

**Table 1:** Characteristics of study participants

| Characteristic*                                | Age                 |                     | p value |
|------------------------------------------------|---------------------|---------------------|---------|
|                                                | <60 years<br>n=1328 | ≥60 years<br>n=2164 |         |
| Age to 2015 (years)                            | 50.1 (8.4)          | 70.7 (7.0)          | <0.001  |
| Male                                           | 650 (49.5)          | 1208 (56.5)         | <0.001  |
| Age when diabetes first diagnosed (years)      | 40.6 (9.4)          | 54.9 (10.6)         | <0.001  |
| Diabetes duration (years)                      | 9.6 (7.5)           | 15.9 (9.6)          | <0.001  |
| HbA1c (%)                                      | 8.6 (2.1)           | 8.0 (1.6)           | <0.001  |
| <u>Cardiovascular risk factors</u>             |                     |                     |         |
| Systolic blood pressure (mmHg)                 | 130.5 (18.1)        | 134.1 (18.6)        | <0.001  |
| Diastolic blood pressure (mmHg)                | 77.7 (10.5)         | 72.6 (10.2)         | <0.001  |
| Current smoker                                 | 235 (20.2)          | 161 (8.9)           |         |
| Past smoker                                    | 350 (30.1)          | 713 (39.4)          | <0.001  |
| Never smoker                                   | 577 (49.7)          | 936 (51.7)          |         |
| Total cholesterol (mmol/l)                     | 4.6 (1.3)           | 4.0 (1.1)           | <0.001  |
| LDL-cholesterol (mmol/l)                       | 2.4 (1.6)           | 2.0 (0.9)           | <0.001  |
| HDL-cholesterol (mmol/l)                       | 1.1 (0.4)           | 1.1 (0.4)           | 0.010   |
| Triglyceride (mmol/l)                          | 2.5 (2.4)           | 2.1 (1.7)           | <0.001  |
| Serum creatinine (μmol/l)                      | 89.5 (91.7)         | 109.5 (91.3)        | <0.001  |
| eGFR ml/min/1.73m <sup>2</sup>                 | 89.3 (35.9)         | 65.9 (27.1)         | <0.001  |
| Body Mass Index (kg/m <sup>2</sup> )           | 34.5 (8.4)          | 32.4 (6.7)          | <0.001  |
| <u>Treatments</u>                              |                     |                     |         |
| Diet alone                                     | 65 (4.9)            | 77 (3.6)            | 0.052   |
| Oral glucose lowering agents                   | 1050 (79.1)         | 1634 (75.5)         | 0.013   |
| Non-insulin injectable glucose lowering agents | 94 (7.1)            | 98 (4.5)            | 0.003   |
| Insulin                                        | 769 (57.9)          | 1348 (62.3)         | 0.010   |
| <u>Cardiovascular disease</u>                  |                     |                     |         |
| Microvascular complications                    | 414 (35.3)          | 950 (49.3)          | <0.001  |
| Macrovascular complications                    | 247 (21.6)          | 847 (43.4)          | <0.001  |

\* categorical variables were presented as n (%) and continuous variables as mean (SD) or median (IQR), as appropriate

# categorical variables were assessed with the Chi square test. Continuous variables were tested for normality, analyses were performed using ANOVA for normally distributed data and Mann-Whitney U tests for non-normally distributed data

Microvascular complications defined as retinopathy, nephropathy or peripheral neuropathy

Macrovascular complications defined as either cardiovascular, cerebrovascular or peripheral vascular disease

1  
2  
3  
4  
5  
6  
7  
8  
9  
10  
11  
12  
13  
14  
15  
16  
17  
18  
19  
20  
21  
22  
23  
24  
25  
26  
27  
28  
29  
30  
31  
32  
33  
34  
35  
36  
37  
38  
39  
40  
41  
42  
43  
44  
45  
46  
47  
48  
49  
50  
51  
52  
53  
54  
55  
56  
57  
58  
59  
60

For peer review only

**Table 2:** Unadjusted and adjusted odds of factors associated with suboptimal glycaemic control and adverse cardiovascular risk factor levels.

|                                                   | HbA1c above target (7.0%, 53 mmol/mol) |         |                        |         | Hypertension         |         |                        |         | Dyslipidaemia        |         |                        |         | Obesity              |         |                        |         | Current Smoker       |         |                        |         |
|---------------------------------------------------|----------------------------------------|---------|------------------------|---------|----------------------|---------|------------------------|---------|----------------------|---------|------------------------|---------|----------------------|---------|------------------------|---------|----------------------|---------|------------------------|---------|
|                                                   | Univariable Analysis                   |         | Multivariable Analysis |         | Univariable Analysis |         | Multivariable Analysis |         | Univariable Analysis |         | Multivariable Analysis |         | Univariable Analysis |         | Multivariable Analysis |         | Univariable Analysis |         | Multivariable Analysis |         |
|                                                   | OR (95%CI)                             | p value | OR (95%CI)             | p value | OR (95%CI)           | p value | OR (95%CI)             | p value | OR (95%CI)           | p value | OR (95%CI)             | p value | OR (95%CI)           | p value | OR (95%CI)             | p value | OR (95%CI)           | p value | OR (95%CI)             | p value |
| <b>Age</b>                                        |                                        |         |                        |         |                      |         |                        |         |                      |         |                        |         |                      |         |                        |         |                      |         |                        |         |
| ≥60 y (ref)                                       |                                        |         |                        |         |                      |         |                        |         |                      |         |                        |         |                      |         |                        |         |                      |         |                        |         |
| <60 y                                             | 1.26 (1.07-1.49)                       | 0.005   | 1.50 (1.22-1.84)       | <0.001  | 0.81 (0.70-0.95)     | 0.008   | 0.85 (0.70-1.04)       | 0.119   | 2.41 (1.91-3.03)     | <0.001  | 2.02 (1.53-2.68)       | <0.001  | 1.26 (1.09-1.46)     | 0.002   | 1.25 (1.05-1.49)       | 0.011   | 2.60 (2.09-3.22)     | <0.001  | 2.13 (1.64-2.77)       | <0.001  |
| <b>Duration of Diabetes</b>                       |                                        |         |                        |         |                      |         |                        |         |                      |         |                        |         |                      |         |                        |         |                      |         |                        |         |
| <10 y (ref)                                       |                                        |         |                        |         |                      |         |                        |         |                      |         |                        |         |                      |         |                        |         |                      |         |                        |         |
| ≥10 y                                             | 2.05 (1.74-2.40)                       | <0.001  | 2.51 (2.07-3.03)       | <0.001  | 1.16 (0.99-1.35)     | 0.067   | 1.03 (0.85-1.25)       | 0.735   | 0.66 (0.53-0.81)     | <0.001  | 0.79 (0.60-1.03)       | 0.087   | 1.04 (0.90-1.20)     | 0.597   |                        |         | 0.59 (0.48-0.73)     | <0.001  | 0.82 (0.64-1.06)       | 0.124   |
| <b>Sex</b>                                        |                                        |         |                        |         |                      |         |                        |         |                      |         |                        |         |                      |         |                        |         |                      |         |                        |         |
| Male (ref)                                        |                                        |         |                        |         |                      |         |                        |         |                      |         |                        |         |                      |         |                        |         |                      |         |                        |         |
| Female                                            | 1.18 (1.01-1.38)                       | 0.039   | 1.16 (0.97-1.39)       | 0.100   | 1.02 (0.88-1.18)     | 0.828   | 0.87 (0.73-1.04)       | 0.129   | 0.76 (0.62-0.92)     | 0.005   | 0.70 (0.55-0.90)       | 0.005   | 1.34 (1.16-1.54)     | <0.001  | 1.38 (1.16-1.63)       | <0.001  | 0.70 (0.56-0.87)     | 0.001   | 0.70 (0.55-0.89)       | 0.004   |
| <b>Smoking</b>                                    |                                        |         |                        |         |                      |         |                        |         |                      |         |                        |         |                      |         |                        |         |                      |         |                        |         |
| Never (ref)                                       |                                        |         |                        |         |                      |         |                        |         |                      |         |                        |         |                      |         |                        |         |                      |         |                        |         |
| Past                                              | 1.09 (0.9-1.32)                        | 0.368   |                        |         | 0.93 (0.79-1.10)     | 0.418   | 0.90 (0.74-1.09)       | 0.287   | 1.10 (0.87-1.38)     | 0.419   | 1.01 (0.77-1.32)       | 0.947   | 1.44 (1.22-1.71)     | <0.001  | 1.63 (1.35-1.96)       | <0.001  |                      |         |                        |         |
| Current                                           | 1.09 (0.84-1.42)                       | 0.512   |                        |         | 0.65 (0.50-0.84)     | 0.001   | 0.72 (0.54-0.96)       | 0.024   | 1.73 (1.18-2.52)     | 0.005   | 1.32 (0.87-1.99)       | 0.187   | 0.93 (0.74-1.17)     | 0.517   | 0.92 (0.72-1.18)       | 0.525   |                      |         |                        |         |
| <b>eGFR (ml/min/1.73m<sup>2</sup>) (per unit)</b> | 1.00 (0.99-1.00)                       | 0.073   | 1.00 (1.00-1.01)       | 0.034   | 1.00 (0.99-1.00)     | 0.001   | 1.00 (0.99-1.00)       | 0.008   | 1.00 (1.00-1.01)     | 0.144   |                        |         | 1.00 (1.00-1.00)     | 0.307   |                        |         | 1.01 (1.01-1.01)     | <0.001  | 1.01 (1.00-1.01)       | 0.001   |
| <b>BMI (kg/m<sup>2</sup>) (per unit)</b>          | 1.03 (1.02-1.04)                       | <0.001  | 1.03 (1.02-1.04)       | <0.001  | 1.02 (1.01-1.03)     | <0.001  | 1.02 (1.01-1.03)       | 0.001   | 1.02 (1.01-1.04)     | 0.004   | 1.02 (1.00-1.03)       | 0.077   |                      |         |                        |         | 0.98 (0.97-1.00)     | 0.017   | 0.97 (0.95-0.99)       | 0.001   |
| <b>HbA1c (%) (per unit)</b>                       |                                        |         |                        |         | 1.03 (0.99-1.07)     | 0.156   |                        |         | 1.18 (1.11-1.26)     | <0.001  | 1.14 (1.05-1.23)       | 0.001   | 1.07 (1.03-1.12)     | 0.001   | 1.05 (1.00-1.10)       | 0.049   |                      |         |                        |         |

\*Multivariable analyses are, where appropriate, adjusted for gender, diabetes duration, smoking, estimated glomerular filtration rates, body mass index and HbA1c.

#Hypertension is defined as systolic blood pressure >140mmHg and/or diastolic blood pressure >90 mmHg

†Dyslipidaemia is defined as either total cholesterol >4.0 mmol/L, high density lipoprotein <1.0 mmol/L, low density lipoprotein >2.0 mmol/L or triglycerides >2.0 mmol/L

‡Obesity is defined as Body Mass Index >30 kg/m<sup>2</sup>

1 **Figure 1:** Risks of adverse cardiovascular risk factor levels in patients with type 2 diabetes by age group  
2  
3  
4  
5  
6  
7  
8  
9  
10  
11  
12  
13  
14  
15  
16  
17  
18  
19  
20  
21  
22  
23  
24  
25  
26  
27  
28  
29  
30  
31  
32

For peer review only

33 **Figure 2:** Blood pressure (i) and lipid management (ii) gaps in patients with type 2 diabetes  
34  
35  
36  
37  
38  
39  
40  
41  
42  
43  
44  
45  
46  
47

**Figure 1:** Risks of adverse cardiovascular risk factor levels in patients with type 2 diabetes by age group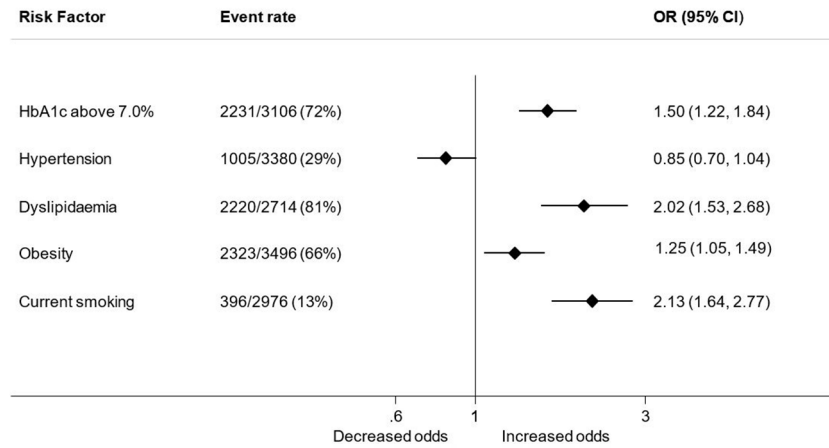

The diamonds refer to the odds ratios for patients aged <60 years compared to the reference group of patients aged ≥60 years for each of the outcomes listed. Multivariable analyses are, where appropriate, adjusted for gender, diabetes duration, smoking, estimated glomerular filtration rates, body mass index and HbA1c. Hypertension is defined as systolic blood pressure >140mmHg and/or diastolic blood pressure >90 mmHg. Dyslipidaemia is defined as either total cholesterol >4.0 mmol/L, high density lipoprotein <1.0 mmol/L, low density lipoprotein >2.0 mmol/L or triglycerides >2.0 mmol/L. Obesity is defined as Body Mass Index >30 kg/m<sup>2</sup>.

Figure 1: Risks of adverse cardiovascular risk factor levels in patients with type 2 diabetes by age group

111x68mm (300 x 300 DPI)

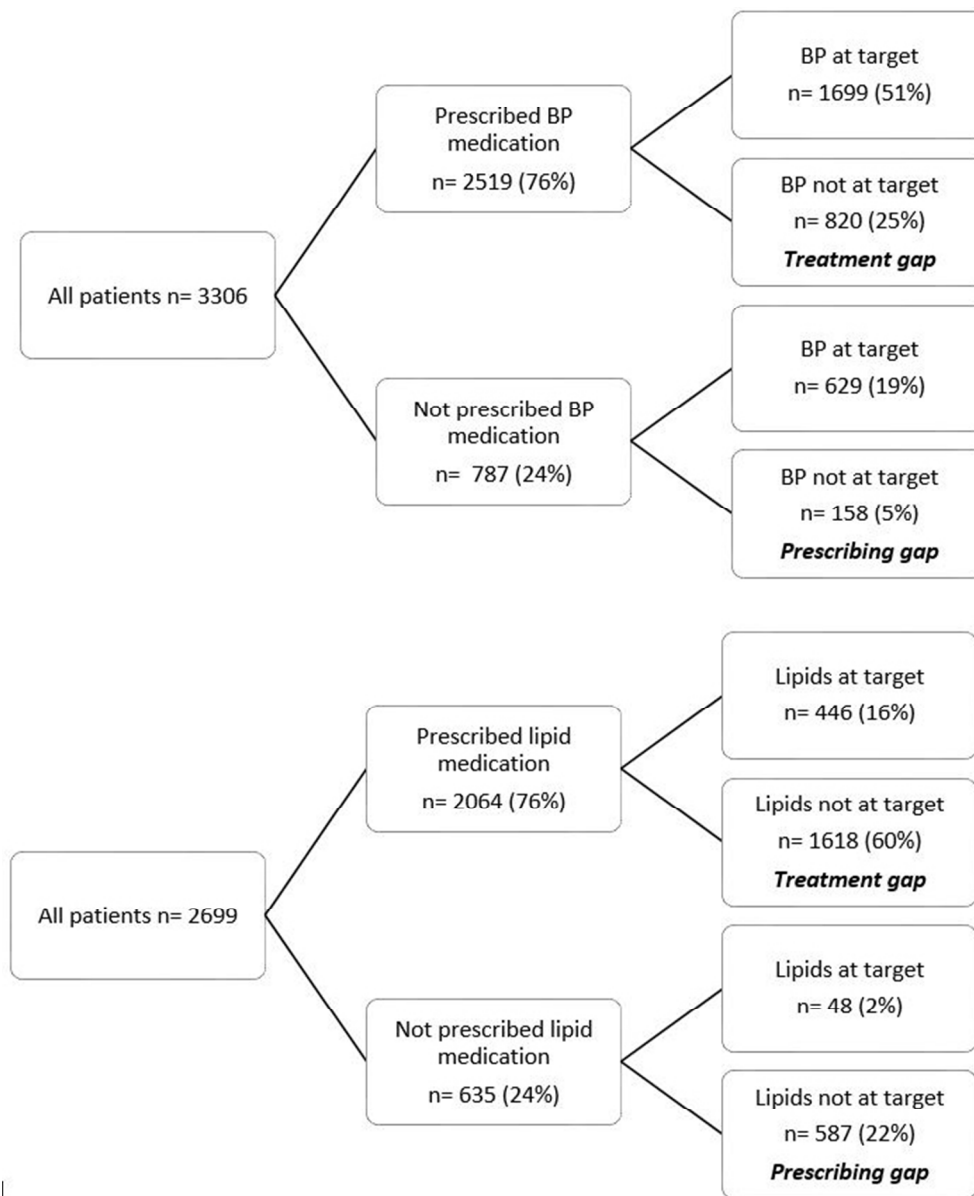

Figure 2: Blood pressure and lipid management gaps in patients with type 2 diabetes

59x72mm (300 x 300 DPI)



## Supplementary Tables

**Suppl. Table 1:** Number of participating diabetes centres and patients by state or territory

| State/Territory              | Participating centres | Number of patients included |
|------------------------------|-----------------------|-----------------------------|
| Australian Capital Territory | 1                     | 49                          |
| New South Wales              | 13                    | 1246                        |
| Northern Territory           | 1                     | 91                          |
| Queensland                   | 9                     | 758                         |
| South Australia              | 1                     | 44                          |
| Tasmania                     | 3                     | 140                         |
| Victoria                     | 20                    | 1119                        |
| Western Australia            | 1                     | 45                          |
| Total                        | 49                    | 3492                        |

**Suppl. Table 2:** Unadjusted and adjusted odds of variables associated with prescribing gaps

|                                          | <b>HbA1c &gt; 8.0% and not on insulin</b> |         |                        |         | <b>Hypertension and not on BP medication</b> |         |                        |         | <b>Dyslipidaemia and not on lipid medication</b> |         |                        |         |
|------------------------------------------|-------------------------------------------|---------|------------------------|---------|----------------------------------------------|---------|------------------------|---------|--------------------------------------------------|---------|------------------------|---------|
|                                          | Univariable Analysis                      |         | Multivariable Analysis |         | Univariable Analysis                         |         | Multivariable Analysis |         | Univariable Analysis                             |         | Multivariable Analysis |         |
|                                          | OR<br>(95% CI)                            | p value | OR<br>(95% CI)         | p value | OR<br>(95% CI)                               | p value | OR<br>(95% CI)         | p value | OR<br>(95% CI)                                   | p value | OR<br>(95% CI)         | p value |
| <b>Age (y)</b>                           |                                           |         |                        |         |                                              |         |                        |         |                                                  |         |                        |         |
| ≥60 (ref)                                |                                           |         |                        |         |                                              |         |                        |         |                                                  |         |                        |         |
| <60                                      | 1.23<br>(1.01-1.50)                       | 0.041   | 0.80<br>(0.61-1.04)    | 0.090   | 2.71<br>(1.91-3.83)                          | <0.001  | 1.84<br>(1.16-2.92)    | 0.010   | 2.17<br>(1.79-2.63)                              | <0.001  | 1.48<br>(1.15-1.90)    | 0.002   |
| <b>Duration of Diabetes (y)</b>          |                                           |         |                        |         |                                              |         |                        |         |                                                  |         |                        |         |
| <10 (ref)                                |                                           |         |                        |         |                                              |         |                        |         |                                                  |         |                        |         |
| ≥10                                      | 0.28<br>(0.23-0.35)                       | <0.001  | 0.28<br>(0.22-0.36)    | <0.001  | 0.39<br>(0.28-0.56)                          | <0.001  | 0.46<br>(0.29-0.71)    | 0.001   | 0.41<br>(0.34-0.50)                              | <0.001  | 0.54<br>(0.42-0.69)    | <0.001  |
| <b>Gender</b>                            |                                           |         |                        |         |                                              |         |                        |         |                                                  |         |                        |         |
| Male (ref)                               |                                           |         |                        |         |                                              |         |                        |         |                                                  |         |                        |         |
| Female                                   | 0.89<br>(0.73-1.08)                       | 0.239   | 0.87<br>(0.69-1.11)    | 0.260   | 0.96<br>(0.68-1.36)                          | 0.818   | 0.97<br>(0.62-1.51)    | 0.890   | 1.37<br>(1.13-1.66)                              | 0.001   | 1.19<br>(0.93-1.51)    | 0.160   |
| <b>Smoking</b>                           |                                           |         |                        |         |                                              |         |                        |         |                                                  |         |                        |         |
| Never (ref)                              |                                           |         |                        |         |                                              |         |                        |         |                                                  |         |                        |         |
| Past                                     | 0.83<br>(0.66-1.05)                       | 0.117   |                        |         | 0.57<br>(0.38-0.86)                          | 0.008   | 0.66<br>(0.41-1.09)    | 0.103   | 0.71<br>(0.57-0.90)                              | 0.005   | 0.76<br>(0.59-0.99)    | 0.043   |
| Current                                  | 0.97<br>(0.71-1.33)                       | 0.861   |                        |         | 1.57<br>(0.94-2.64)                          | 0.087   | 1.40<br>(0.74-2.65)    | 0.301   | 1.06<br>(0.78-1.44)                              | 0.711   | 1.03<br>(0.73-1.46)    | 0.856   |
| <b>eGFR (ml/min) (per unit)</b>          | 1.01<br>(1.00-1.01)                       | 0.001   | 1.00<br>(1.00-1.01)    | 0.049   | 1.02<br>(1.01-1.02)                          | <0.001  | 1.01<br>(1.00-1.01)    | 0.012   | 1.01<br>(1.01-1.01)                              | <0.001  | 1.01<br>(1.00-1.01)    | 0.005   |
| <b>BMI (kg/m<sup>2</sup>) (per unit)</b> | 0.98<br>(0.97-1.00)                       | 0.021   | 0.98<br>(0.96-0.99)    | 0.004   | 0.98<br>(0.96-1.00)                          | 0.100   | 0.95<br>(0.93-0.98)    | 0.002   | 0.99<br>(0.98-1.01)                              | 0.238   |                        |         |
| <b>HbA1c (%) (per unit)</b>              |                                           |         |                        |         | 1.05<br>(0.95-1.16)                          | 0.331   |                        |         | 0.98<br>(0.93-1.04)                              | 0.497   |                        |         |
| <b>Vascular disease</b>                  |                                           |         |                        |         |                                              |         |                        |         |                                                  |         |                        |         |
| No (ref)                                 |                                           |         |                        |         |                                              |         |                        |         |                                                  |         |                        |         |
| Yes                                      |                                           |         |                        |         | 0.37<br>(0.26-0.53)                          | <0.001  | 0.48<br>(0.31-0.75)    | 0.001   | 0.36<br>(0.29-0.44)                              | <0.001  | 0.51<br>(0.40-0.66)    | <0.001  |

\*Multivariable analyses are, where appropriate, adjusted for gender, diabetes duration, smoking, estimated glomerular filtration rates, body mass index and HbA1c.

#Hypertension is defined as systolic blood pressure >140mmHg and/or diastolic blood pressure >90 mmHg

†Dyslipidaemia is defined as either total cholesterol >4.0 mmol/L, high density lipoprotein <1.0 mmol/L, low density lipoprotein >2.0 mmol/L or triglycerides >2.0 mmol/L

**Suppl. Table 3:** Unadjusted and adjusted odds of variables associated with suboptimal glycaemic control and adverse cardiovascular risk factor levels, excluding patients with diabetes duration  $\leq 2$  years.

|                                                   | <b>HbA1c above target (7.0%, 53 mmol/mol)</b> |         |                        |         | <b>Hypertension</b>  |         |                        |         | <b>Dyslipidaemia</b> |         |                        |         | <b>Obesity</b>       |         |                        |         | <b>Current Smoker</b> |         |                        |         |
|---------------------------------------------------|-----------------------------------------------|---------|------------------------|---------|----------------------|---------|------------------------|---------|----------------------|---------|------------------------|---------|----------------------|---------|------------------------|---------|-----------------------|---------|------------------------|---------|
|                                                   | Univariable Analysis                          |         | Multivariable Analysis |         | Univariable Analysis |         | Multivariable Analysis |         | Univariable Analysis |         | Multivariable Analysis |         | Univariable Analysis |         | Multivariable Analysis |         | Univariable Analysis  |         | Multivariable Analysis |         |
|                                                   | OR (95% CI)                                   | p value | OR (95% CI)            | p value | OR (95% CI)          | p value | OR (95% CI)            | p value | OR (95% CI)          | p value | OR (95% CI)            | p value | OR (95% CI)          | p value | OR (95% CI)            | p value | OR (95% CI)           | p value | OR (95% CI)            | p value |
| <b>Age</b>                                        |                                               |         |                        |         |                      |         |                        |         |                      |         |                        |         |                      |         |                        |         |                       |         |                        |         |
| ≥60 y (ref)                                       |                                               |         |                        |         |                      |         |                        |         |                      |         |                        |         |                      |         |                        |         |                       |         |                        |         |
| <60 y                                             | 1.47 (1.22-1.77)                              | <0.001  | 1.59 (1.27-2.00)       | <0.001  | 0.88 (0.74-1.04)     | 0.122   | 0.90 (0.72-1.12)       | 0.339   | 2.17 (1.71-2.76)     | <0.001  | 1.89 (1.41-2.53)       | <0.001  | 1.31 (1.11-1.54)     | 0.001   | 1.28 (1.06-1.55)       | 0.010   | 2.50 (1.96-3.17)      | <0.001  | 2.19 (1.64-2.92)       | <0.001  |
| <b>Duration</b>                                   |                                               |         |                        |         |                      |         |                        |         |                      |         |                        |         |                      |         |                        |         |                       |         |                        |         |
| <10 y (ref)                                       |                                               |         |                        |         |                      |         |                        |         |                      |         |                        |         |                      |         |                        |         |                       |         |                        |         |
| ≥10 y                                             | 1.65 (1.37-1.98)                              | <0.001  | 2.05 (1.66-2.54)       | <0.001  | 1.10 (0.92-1.31)     | 0.295   |                        |         | 0.80 (0.63-1.01)     | 0.065   | 0.93 (0.70-1.25)       | 0.631   | 1.02 (0.86-1.21)     | 0.793   |                        |         | 0.71 (0.55-0.92)      | 0.009   | 1.00 (0.75-1.35)       | 0.983   |
| <b>Sex</b>                                        |                                               |         |                        |         |                      |         |                        |         |                      |         |                        |         |                      |         |                        |         |                       |         |                        |         |
| Male (ref)                                        |                                               |         |                        |         |                      |         |                        |         |                      |         |                        |         |                      |         |                        |         |                       |         |                        |         |
| Female                                            | 1.18 (0.99-1.40)                              | 0.062   | 1.18 (0.97-1.44)       | 0.093   | 1.05 (0.90-1.23)     | 0.555   | 0.96 (0.78-1.17)       | 0.657   | 0.75 (0.61-0.92)     | 0.006   | 0.70 (0.54-0.90)       | 0.006   | 1.29 (1.11-1.50)     | 0.001   | 1.35 (1.12-1.62)       | 0.001   | 0.74 (0.58-0.94)      | 0.015   | 0.77 (0.59-1.01)       | 0.060   |
| <b>Smoking</b>                                    |                                               |         |                        |         |                      |         |                        |         |                      |         |                        |         |                      |         |                        |         |                       |         |                        |         |
| Never (ref)                                       |                                               |         |                        |         |                      |         |                        |         |                      |         |                        |         |                      |         |                        |         |                       |         |                        |         |
| Past                                              | 1.08 (0.88-1.32)                              | 0.484   |                        |         | 0.92 (0.77-1.11)     | 0.387   | 0.97 (0.78-1.19)       | 0.748   | 1.08 (0.85-1.37)     | 0.539   | 0.97 (0.74-1.28)       | 0.853   | 1.51 (1.26-1.81)     | <0.001  | 1.69 (1.38-2.06)       | <0.001  |                       |         |                        |         |
| Current                                           | 1.22 (0.89-1.66)                              | 0.215   |                        |         | 0.68 (0.51-0.90)     | 0.006   | 0.74 (0.53-1.02)       | 0.062   | 1.46 (0.99-2.17)     | 0.058   | 1.18 (0.77-1.81)       | 0.446   | 0.95 (0.74-1.23)     | 0.712   | 0.90 (0.69-1.19)       | 0.468   |                       |         |                        |         |
| <b>eGFR (ml/min/1.73m<sup>2</sup>) (per unit)</b> | 1.00 (1.00-1.01)                              | 0.002   | 1.00 (1.00-1.01)       | 0.014   | 1.00 (0.99-1.00)     | 0.005   | 1.00 (0.99-1.00)       | 0.011   | 1.00 (1.00-1.00)     | 0.655   |                        |         | 1.00 (1.00-1.00)     | 0.175   |                        |         | 1.01 (1.01-1.01)      | <0.001  | 1.01 (1.00-1.01)       | 0.001   |
| <b>BMI (kg/m<sup>2</sup>) (per unit)</b>          | 1.03 (1.02-1.05)                              | <0.001  | 1.03 (1.02-1.05)       | <0.001  | 1.02 (1.01-1.03)     | <0.001  | 1.02 (1.00-1.03)       | 0.009   | 1.02 (1.00-1.04)     | 0.013   | 1.02 (1.00-1.03)       | 0.097   |                      |         |                        |         | 0.98 (0.96-1.00)      | 0.016   | 0.96 (0.95-0.98)       | <0.001  |
| <b>HbA1c (%) (per unit)</b>                       |                                               |         |                        |         | 1.04 (1.00-1.09)     | 0.075   | 1.02 (0.97-1.08)       | 0.477   | 1.21 (1.12-1.29)     | <0.001  | 1.14 (1.05-1.23)       | 0.002   | 1.09 (1.04-1.14)     | <0.001  | 1.05 (1.00-1.11)       | 0.040   |                       |         |                        |         |

\*Multivariable analyses are, where appropriate, adjusted for gender, diabetes duration, smoking, estimated glomerular filtration rates, body mass index and HbA1c.

#Hypertension is defined as systolic blood pressure >140mmHg and/or diastolic blood pressure >90 mmHg

†Dyslipidaemia is defined as either total cholesterol >4.0 mmol/L, high density lipoprotein <1.0 mmol/L, low density lipoprotein >2.0 mmol/L or triglycerides >2.0 mmol/L

‡Obesity is defined as Body Mass Index >30 kg/m<sup>2</sup>

**Suppl. Table 4:** Unadjusted and adjusted odds of variables associated with suboptimal glycaemic control and adverse cardiovascular risk factor levels, adjusted for diabetes centre type.

|                                                   | HbA1c above target (7.0%, 53 mmol/mol) |         |                        |         | Hypertension         |         |                        |         | Dyslipidaemia        |         |                        |         | Obesity              |         |                        |         | Current Smoker       |         |                        |         |
|---------------------------------------------------|----------------------------------------|---------|------------------------|---------|----------------------|---------|------------------------|---------|----------------------|---------|------------------------|---------|----------------------|---------|------------------------|---------|----------------------|---------|------------------------|---------|
|                                                   | Univariable Analysis                   |         | Multivariable Analysis |         | Univariable Analysis |         | Multivariable Analysis |         | Univariable Analysis |         | Multivariable Analysis |         | Univariable Analysis |         | Multivariable Analysis |         | Univariable Analysis |         | Multivariable Analysis |         |
|                                                   | OR (95%CI)                             | p value | OR (95%CI)             | p value | OR (95%CI)           | p value | OR (95%CI)             | p value | OR (95%CI)           | p value | OR (95%CI)             | p value | OR (95%CI)           | p value | OR (95%CI)             | p value | OR (95%CI)           | p value | OR (95%CI)             | p value |
| <b>Age</b>                                        |                                        |         |                        |         |                      |         |                        |         |                      |         |                        |         |                      |         |                        |         |                      |         |                        |         |
| ≥60 y (ref)                                       |                                        |         |                        |         |                      |         |                        |         |                      |         |                        |         |                      |         |                        |         |                      |         |                        |         |
| <60 y                                             | 1.26 (1.07-1.49)                       | 0.005   | 1.51 (1.23-1.86)       | <0.001  | 0.81 (0.70-0.95)     | 0.008   | 0.86 (0.70-1.05)       | 0.133   | 2.41 (1.91-3.03)     | <0.001  | 2.05 (1.55-2.72)       | <0.001  | 1.26 (1.09-1.46)     | 0.002   | 1.26 (1.06-1.50)       | 0.009   | 2.60 (2.09-3.22)     | <0.001  | 2.09 (1.61-2.72)       | <0.001  |
| <b>Duration of Diabetes</b>                       |                                        |         |                        |         |                      |         |                        |         |                      |         |                        |         |                      |         |                        |         |                      |         |                        |         |
| <10 y (ref)                                       |                                        |         |                        |         |                      |         |                        |         |                      |         |                        |         |                      |         |                        |         |                      |         |                        |         |
| ≥10 y                                             | 2.05 (1.74-2.40)                       | <0.001  | 2.52 (2.08-3.05)       | <0.001  | 1.16 (0.99-1.35)     | 0.067   | 1.04 (0.86-1.26)       | 0.702   | 0.66 (0.53-0.81)     | <0.001  | 0.80 (0.61-1.05)       | 0.115   | 1.04 (0.90-1.20)     | 0.597   |                        |         | 0.59 (0.48-0.73)     | <0.001  | 0.81 (0.63-1.04)       | 0.099   |
| <b>Sex</b>                                        |                                        |         |                        |         |                      |         |                        |         |                      |         |                        |         |                      |         |                        |         |                      |         |                        |         |
| Male (ref)                                        |                                        |         |                        |         |                      |         |                        |         |                      |         |                        |         |                      |         |                        |         |                      |         |                        |         |
| Female                                            | 1.18 (1.01-1.38)                       | 0.039   | 1.15 (0.96-1.38)       | 0.119   | 1.02 (0.88-1.18)     | 0.828   | 0.87 (0.72-1.04)       | 0.121   | 0.76 (0.62-0.92)     | 0.005   | 0.70 (0.55-0.90)       | 0.005   | 1.34 (1.16-1.54)     | <0.001  | 1.37 (1.16-1.63)       | <0.001  | 0.70 (0.56-0.87)     | 0.001   | 0.71 (0.55-0.90)       | 0.005   |
| <b>Smoking</b>                                    |                                        |         |                        |         |                      |         |                        |         |                      |         |                        |         |                      |         |                        |         |                      |         |                        |         |
| Never (ref)                                       |                                        |         |                        |         |                      |         |                        |         |                      |         |                        |         |                      |         |                        |         |                      |         |                        |         |
| Past                                              | 1.09 (0.9-1.32)                        | 0.368   |                        |         | 0.93 (0.79-1.10)     | 0.418   | 0.90 (0.74-1.09)       | 0.281   | 1.10 (0.87-1.38)     | 0.419   | 1.01 (0.78-1.32)       | 0.920   | 1.44 (1.22-1.71)     | <0.001  | 1.63 (1.35-1.97)       | <0.001  |                      |         |                        |         |
| Current                                           | 1.09 (0.84-1.42)                       | 0.512   |                        |         | 0.65 (0.50-0.84)     | 0.001   | 0.72 (0.54-0.96)       | 0.025   | 1.73 (1.18-2.52)     | 0.005   | 1.34 (0.89-2.02)       | 0.164   | 0.93 (0.74-1.17)     | 0.517   | 0.93 (0.73-1.19)       | 0.562   |                      |         |                        |         |
| <b>eGFR (ml/min/1.73m<sup>2</sup>) (per unit)</b> | 1.00 (0.99-1.00)                       | 0.073   | 1.00 (1.00-1.01)       | 0.040   | 1.00 (0.99-1.00)     | 0.001   | 1.00 (0.99-1.00)       | 0.007   | 1.00 (1.00-1.01)     | 0.144   |                        |         | 1.00 (1.00-1.00)     | 0.307   |                        |         | 1.01 (1.01-1.01)     | <0.001  | 1.01 (1.00-1.01)       | 0.001   |
| <b>BMI (kg/m<sup>2</sup>) (per unit)</b>          | 1.03 (1.02-1.04)                       | <0.001  | 1.03 (1.02-1.04)       | <0.001  | 1.02 (1.01-1.03)     | <0.001  | 1.02 (1.01-1.03)       | 0.001   | 1.02 (1.01-1.04)     | 0.004   | 1.02 (1.00-1.03)       | 0.088   |                      |         |                        |         | 0.98 (0.97-1.00)     | 0.017   | 0.97 (0.96-0.99)       | 0.001   |
| <b>HbA1c (%) (per unit)</b>                       |                                        |         |                        |         | 1.03 (0.99-1.07)     | 0.156   |                        |         | 1.18 (1.11-1.26)     | <0.001  | 1.13 (1.05-1.22)       | 0.001   | 1.07 (1.03-1.12)     | 0.001   | 1.05 (1.00-1.09)       | 0.054   |                      |         |                        |         |
| <b>Centre type<sup>^</sup></b>                    | 1.06 (0.83-1.36)                       | 0.617   | 1.25 (0.94-1.67)       | 0.122   | 1.18 (0.96-1.45)     | 0.115   | 1.07 (0.85-1.35)       | 0.576   | 1.04 (0.79-1.36)     | 0.802   | 1.25 (0.88-1.78)       | 0.203   | 1.15 (0.94-1.41)     | 0.180   | 1.18 (0.93-1.50)       | 0.170   | 0.17 (0.15-0.18)     | <0.001  | 0.75 (0.53-1.07)       | 0.113   |

\*Multivariable analyses are, where appropriate, adjusted for gender, diabetes duration, smoking, estimated glomerular filtration rates, body mass index and HbA1c.

#Hypertension is defined as systolic blood pressure >140mmHg and/or diastolic blood pressure >90 mmHg

†Dyslipidaemia is defined as either total cholesterol >4.0 mmol/L, high density lipoprotein <1.0 mmol/L, low density lipoprotein >2.0 mmol/L or triglycerides >2.0 mmol/L

‡Obesity is defined as Body Mass Index >30 kg/m<sup>2</sup>

<sup>^</sup> Tertiary care centres (reference group) compared with primary and secondary care centres

# BMJ Open

## Age related differences in glycaemic control, cardiovascular disease risk factors and treatment in patients with type 2 diabetes: a cross-sectional study from the Australian National Diabetes Audit

|                                 |                                                                                                                                                                                                                                                                                                                                                                                                                                                                                                                                                                                                                                                                                                                                                                                                                                                                                         |
|---------------------------------|-----------------------------------------------------------------------------------------------------------------------------------------------------------------------------------------------------------------------------------------------------------------------------------------------------------------------------------------------------------------------------------------------------------------------------------------------------------------------------------------------------------------------------------------------------------------------------------------------------------------------------------------------------------------------------------------------------------------------------------------------------------------------------------------------------------------------------------------------------------------------------------------|
| Journal:                        | <i>BMJ Open</i>                                                                                                                                                                                                                                                                                                                                                                                                                                                                                                                                                                                                                                                                                                                                                                                                                                                                         |
| Manuscript ID                   | bmjopen-2017-020677.R2                                                                                                                                                                                                                                                                                                                                                                                                                                                                                                                                                                                                                                                                                                                                                                                                                                                                  |
| Article Type:                   | Research                                                                                                                                                                                                                                                                                                                                                                                                                                                                                                                                                                                                                                                                                                                                                                                                                                                                                |
| Date Submitted by the Author:   | 26-Jun-2018                                                                                                                                                                                                                                                                                                                                                                                                                                                                                                                                                                                                                                                                                                                                                                                                                                                                             |
| Complete List of Authors:       | Nanayakkara, Natalie; Monash University, School of Public Health and Preventive Medicine<br>Ranasinha, Sanjeeva; Monash University, Faculty of Medicine, Nursing & Health Sciences<br>Gadowski, Adelle; Monash University, School of Public Health and Preventive Medicine<br>Davis, Wendy; University of Western Australia, Fremantle Hospital, School of Medicine and Pharmacology<br>Flack, Jeffrey; Bankstown-Lidcombe Hospital, Diabetes Centre; University of New South Wales - Randwick Campus, Faculty of Medicine<br>Wischer, Natalie; National Association of Diabetes Centres<br>Andrikopoulos, Sof; University of Melbourne, Department of Medicine (AH)<br>Zoungas, Sophia; Monash University, . Monash Centre for Health Research and Implementation-MCHRI, School of Public Health and Preventive Medicine; University of Sydney, The George Institute for Global Health |
| <b>Primary Subject Heading</b>: | Diabetes and endocrinology                                                                                                                                                                                                                                                                                                                                                                                                                                                                                                                                                                                                                                                                                                                                                                                                                                                              |
| Secondary Subject Heading:      | Epidemiology                                                                                                                                                                                                                                                                                                                                                                                                                                                                                                                                                                                                                                                                                                                                                                                                                                                                            |
| Keywords:                       | General diabetes < DIABETES & ENDOCRINOLOGY, EPIDEMIOLOGY, GENERAL MEDICINE (see Internal Medicine)                                                                                                                                                                                                                                                                                                                                                                                                                                                                                                                                                                                                                                                                                                                                                                                     |
|                                 |                                                                                                                                                                                                                                                                                                                                                                                                                                                                                                                                                                                                                                                                                                                                                                                                                                                                                         |

SCHOLARONE™  
Manuscripts

1  
2  
3 **Age related differences in glycaemic control, cardiovascular disease risk factors**  
4  
5 **and treatment in patients with type 2 diabetes: a cross-sectional study from the**  
6  
7 **Australian National Diabetes Audit**  
8  
9

10  
11 Natalie Nanayakkara<sup>1,2</sup>, Sanjeeva Ranasinha<sup>1</sup>, Adelle M Gadowski<sup>2</sup>, Wendy Davis<sup>3</sup>, Jeffrey R Flack<sup>4,5,6</sup>, Natalie  
12 Wischer<sup>7</sup>, Sof Andrikopoulos<sup>8</sup>, Sophia Zoungas<sup>1,2,9</sup>  
13  
14  
15

16  
17 Affiliations

- 18  
19 1. Monash Centre for Health Research and Implementation – MCHRI, School Public Health and  
20 Preventive Medicine, Monash University in partnership with Monash Health, Locked Bag 29, Clayton,  
21 VIC 3168, Australia  
22  
23 2. Department of Epidemiology and Preventive Medicine, School of Public Health and Preventive  
24 Medicine, Monash University, The Alfred Centre, 99 Commercial Road, Melbourne VIC 3004  
25  
26 3. School of Medicine and Pharmacology, University of Western Australia, Fremantle Hospital, PO Box  
27 480, Fremantle, Western Australia 6959, Australia  
28  
29 4. Diabetes Centre, Bankstown-Lidcombe Hospital, Bankstown, NSW, Australia  
30  
31 5. Faculty of Medicine, University of NSW, Sydney NSW, Australia  
32  
33 6. School of Medicine, Western Sydney University, Sydney, NSW, Australia  
34  
35 7. National Association of Diabetes Centres, Sydney, NSW 2000 Australia  
36  
37 8. Australian Diabetes Society, Sydney, NSW 2000 Australia  
38  
39 9. The George Institute for Global Health, Camperdown, NSW 2050 Australia  
40  
41  
42  
43  
44

45 **Corresponding Author**

46  
47 Professor Sophia Zoungas

48  
49  
50 School of Public Health and Preventive Medicine, Monash University

51  
52  
53 Tel.: +61 3 9594 7500; Fax: +61 3 9594 7554

54  
55  
56 E-mail: [sophia.zoungas@monash.edu](mailto:sophia.zoungas@monash.edu)  
57

## Abstract

Objective: To compare the glycaemic control and cardiovascular risk factor profiles of younger and older patients with type 2 diabetes. Cross-sectional analysis of data from the 2015 Australian National Diabetes Audit (ANDA) was undertaken.

Methods: Data were obtained from adults with type 2 diabetes presenting to Australian secondary/tertiary diabetes centres. Logistic regression examined associations with HbA1c >7% (53 mmol/mol) and cardiovascular risk factors.

Results: Data from 3,492 patients were analysed. Mean ( $\pm$ SD) age was 62.9 $\pm$ 12.5 years, mean diabetes duration 13.5 $\pm$ 9.4 years and mean HbA1c 8.2 $\pm$ 1.8%. Mean HbA1c was 8.6 $\pm$ 2.1% and 8.0 $\pm$ 1.6% for the younger (<60 years) and older subgroups ( $\geq$ 60 years) respectively ( $p$ <0.001). The odds (aOR) of HbA1c above >7.0% was 1.5 times higher (95%CI 1.22-1.84) for younger patients compared with older patients after adjustment for gender, smoking, diabetes duration, renal function and body mass index. Younger patients were also more likely to have dyslipidaemia (aOR 2.02 [1.53-2.68],  $p$ <0.001), be obese (aOR 1.25 [1.05-1.49]),  $p$ <0.001) and be current smokers (aOR 2.13 [1.64-2.77],  $p$ <0.001) than older patients.

Conclusions: Younger age was associated with poorer glycaemic control and adverse cardiovascular risk factor profiles. It is imperative to optimise and monitor treatment in order to improve long-term outcomes.

Strengths and limitations of this study:

- large dataset of patients from a nation-wide survey
- information on a broad range of variables with potential impact on glycaemic, blood pressure and lipid control

1  
2  
3  
4  
5  
6  
7  
8  
9  
10  
11  
12  
13  
14  
15  
16  
17  
18  
19  
20  
21  
22  
23  
24  
25  
26  
27  
28  
29  
30  
31  
32  
33  
34  
35  
36  
37  
38  
39  
40  
41  
42  
43  
44  
45  
46  
47  
48  
49  
50  
51  
52  
53  
54  
55  
56  
57  
58  
59  
60

- We were unable to conduct longitudinal analyses as the data were de-identified and the cross-sectional nature of the analysis precluded investigation of causality.
- Study population may largely represent a specialist referred patient group as the majority of patients were receiving care at tertiary diabetes centres

For peer review only



## 1. Introduction

Driven by ageing populations, increasing obesity and decreasing physical activity, the prevalence of diabetes is expected to rise by 55% to 592 million individuals worldwide by 2035(1). Traditionally a disease of middle and older age, type 2 diabetes is increasingly diagnosed in younger patients (2, 3). Diabetes and its complications contribute to 10% of Australian deaths (4) and 8.4 % of deaths worldwide (5).

The US National Health and Nutrition Examination Survey (NHANES) indicated that the prevalence of type 2 diabetes has increased by 70% in people aged 20-44 years in the last three decades, making younger adults the fastest growing group of people with type 2 diabetes (6). Diabetes complications are related to duration and degree of glycaemic control (7), thus younger people with diabetes who start their hyperglycaemic exposure at an earlier age may be at highest risk for end-organ damage. However, few studies have compared glycaemic control in younger and older patients with type 2 diabetes (8, 9). Further, these studies were largely conducted within selected trial cohorts (and as such the patients examined may differ from community based cohorts) and have reported variable findings of better glycaemic control in older patients (10), in younger patients (11) or no effect of age (12).

We hypothesised that there may be age-related differences in the management of patients with type 2 diabetes, which may contribute to excess cardiovascular risk in younger patients. This study investigates differences in the achieved levels and management of (1) glycaemic control and (2) cardiovascular risk factors between younger and older patients with type 2 diabetes.

## 2. Methods

### 2.1 Participants

This national, cross-sectional study examined de-identified data from the 2015 Australian National Diabetes Audit (ANDA) (13). Participants were adult patients with type 2 diabetes, presenting to one of 49 nationally accredited diabetes centres. De-identified data were sourced from a range of diabetes centres located in the community/primary care (n=16) and secondary care (n=33), with patients under the care of endocrinologists, general specialists and local general practitioners. The state and territory location of participating sites is presented in Supplementary Data. Information was collected regarding all consecutive patients attending a participating diabetes centre during the one-month survey period (May or June 2015). The Australian National Diabetes Audit has received approval from the Monash Health Human Research Ethics Committee.

### 2.2 Variables

Pre-specified demographic (gender, date of birth) and clinical variables (diabetes complications, comorbid conditions, blood pressure (BP), glycated haemoglobin A1c (HbA1c), body mass index (BMI), smoking status, medications) were collected for patients with type 2 diabetes. Health professionals from participating centres examined patients, reviewed medical records including pathology results and recorded the information in a standardised data collection form. All missing data, invalid entries and discrepancies were clarified with the patients' treating centres. As per the a priori analysis plan, age at survey was calculated as date of survey (2015) minus date of birth and categorised as <60 years or  $\geq 60$  years, diabetes duration was calculated as date of survey minus date of diabetes diagnosis and categorised as <10 years or  $\geq 10$  years. Height and weight were measured to calculate BMI. Smoking status was categorised as never, previous or current. Recent

1  
2  
3 pathology results (within the last 12 months) were recorded for total cholesterol (TC), low  
4 density lipoprotein (LDL), high density lipoprotein (HDL), triglycerides (TG), HbA1c and  
5 serum creatinine; calculated estimated glomerular filtration rate (eGFR) was calculated using  
6 the Modification of Diet in Renal Disease Study (MDRD) equation (14).  
7  
8  
9  
10

### 11 12 13 14 *2.3 Outcomes*

15 The main outcome variables were HbA1c (categorised as >7.0%, 53 mmol/mol),  
16 hypertension (defined as >140 and/or 90 mmHg), dyslipidaemia (defined as either TC>4.0  
17 mmol/L, HDL<1.0 mmol/L, LDL>2.0 mmol/L or Tg>2.0 mmol/L), obesity (defined as  
18 BMI>30 kg/m<sup>2</sup>) and smoker (categorised as never, past or current). The targets were based on  
19 the current Australian recommendations for people with diabetes as per the Australian Heart  
20 Foundation (15).  
21  
22  
23  
24  
25  
26  
27  
28  
29  
30  
31  
32

### 33 34 *2.4 Statistical analysis*

35 Categorical variables were summarised as percentages and differences between subgroups  
36 analysed using  $\chi^2$  test. Continuous variables were tested for normality to determine the most  
37 appropriate method for statistical analysis (parametric or non-parametric) and reported as  
38 means with standard deviations (SD) or as medians with interquartile ranges (IQR). Subgroup  
39 analyses were performed using ANOVA for normally distributed data and Mann-Whitney U  
40 tests for non-normally distributed data as appropriate. Logistic regression was used to  
41 examine factors (current age, diabetes duration, gender, smoking, calculated eGFR, BMI)  
42 associated with HbA1c, hypertension, dyslipidaemia and obesity (as the categories defined  
43 above). The selection of variables was based on identifying all measured clinical variables of  
44 known or suspected prognostic importance for the outcomes of interest and/or exhibiting a p  
45  
46  
47  
48  
49  
50  
51  
52  
53  
54  
55  
56  
57  
58  
59  
60

1  
2  
3 value  $\leq 0.10$  on univariable analysis. All potential confounding variables were included in the  
4  
5 multivariable models. Subgroup analyses were conducted to examine the effect of treatments  
6  
7 (yes or no) including insulin, antihypertensive therapy and lipid lowering therapy in patients  
8  
9 above the glycaemic, lipid and BP targets. A prescribing gap was defined as patients who  
10  
11 were not prescribed the relevant medications despite being above the recommended targets.  
12  
13 A treatment gap was defined as patients who were above the recommended targets despite  
14  
15 being on treatment. A sensitivity analysis examined the effect of excluding patients with less  
16  
17 than 2 years diabetes duration, who may have not yet had opportunity to modify treatment  
18  
19 and achieve targets and 2) examine the effect of centre type (community/primary and  
20  
21 secondary care) or clustering by centre. Patients were excluded from a particular analysis  
22  
23 when data relevant to that analysis were missing, but were not excluded from other analyses  
24  
25 where appropriate information was provided. Missing data of variables was less than 10%  
26  
27 and not imputed. A two-sided significance level of 0.05 was considered statistically  
28  
29 significant. All analyses were performed using Stata software version 14.2 (StataCorp, Texas,  
30  
31 USA).  
32  
33  
34  
35  
36

### 37 *2.5 Patient and Public Involvement*

38  
39 This research has been reviewed by the ANDA scientific advisory committee, which consists  
40  
41 of clinical and public representatives with an interest in best practice diabetes health care.  
42  
43  
44  
45

## 46 3. Results

### 47 *3.1 Overall*

48  
49 Data from 3,492 patients (>18 years of age) were analysed. Patients from all states and  
50  
51 territories were included (Suppl. Table 1). Younger patients (<60 years) accounted for 38%  
52  
53 (n=1,328) of patients. The clinical characteristics of these patients, stratified by age, are  
54  
55  
56  
57

1  
2  
3 shown in Table 1. The mean ( $\pm$ SD) age of the whole group was 62.9 $\pm$ 12.5 years and the  
4  
5 mean ages of the younger and older age groups were 50.1  $\pm$ 8.4 years and 70.7  $\pm$ 7.0 years  
6  
7 respectively. Mean diabetes duration was 9.6 $\pm$ 7.5 years for the younger age group and  
8  
9 15.9 $\pm$ 9.6 years for the older age group ( $p$ <0.001). There was a higher proportion of male  
10  
11 patients in the older (56.5%) compared with the younger age group (49.5%,  $p$ <0.001). The  
12  
13 majority of patients (64.9%) were treated at tertiary hospitals followed by community or  
14  
15 primary care centres (35.1%). Australian birth was reported by 68.1% of the younger age  
16  
17 group and 62.4% of the older age group ( $p$ =0.001). Microvascular and macrovascular  
18  
19 complications were prevalent in 35.3% and 21.6% of the younger age group and 49.3% and  
20  
21 43.4% of the older age group respectively ( $p$ <0.001 for both).  
22  
23

### 24 25 3.2 Glycaemic control

26  
27 Mean HbA1c was 8.2 $\pm$ 1.8% for the group overall, 8.6 $\pm$ 2.1% and 8.0 $\pm$ 1.6% for the younger  
28  
29 and older age groups respectively ( $p$ <0.001). A greater proportion of patients in the younger  
30  
31 age group had an HbA1c above 7.0% compared with the older age group (Table 1, Figure 1).  
32  
33 On univariable analysis, age, diabetes duration, gender, smoking and BMI were all associated  
34  
35 with an HbA1c above 7.0%. The unadjusted and adjusted odds ratios [95%CI] for HbA1c  
36  
37 above 7.0% were 1.26 [1.07-1.49],  $p$ <0.001 and 1.50 [1.22-1.84],  $p$ <0.001 respectively for  
38  
39 younger patients compared with older patients (Table 2, Figure 1).  
40  
41  
42  
43

44  
45 Glycaemic management was reported as diet only by 4%, oral agents by 77%, non-insulin  
46  
47 injectable therapy by 5% and insulin alone or in combination with oral agents by 61% of  
48  
49 patients. Compared with older patients, younger patients were equally likely to not be on  
50  
51 insulin treatment despite an HbA1c >8.0%, after adjusting for gender, diabetes duration, renal  
52  
53 function and BMI (Suppl. Table 2).  
54  
55  
56  
57  
58  
59  
60

### 3.3 Hypertension

Mean systolic blood pressure (BP) was  $130 \pm 18$  mmHg and  $134 \pm 18$  mmHg for the younger and older age groups respectively ( $p < 0.001$ ). A smaller proportion of patients in the younger age group were hypertensive compared with the older age group (Table 1, Figure 1). Younger patients were less likely to be hypertensive compared with older patients (unadjusted OR 0.81 [0.70-0.95]  $p = 0.008$ ). However, after adjusting for gender, smoking, renal function and BMI this effect was no longer significant (adjusted OR 0.85 [0.70-1.04],  $p = 0.119$ ) (Table 2).

The overall study population prescribing and treatment gaps for hypertension were 5% and 25% respectively (Figure 2). Younger patients who were hypertensive were more likely to not be on blood pressure lowering medication (prescribing gap) than older patients who were hypertensive (adjusted OR 1.84 [1.16-2.92],  $p = 0.002$ ) (Suppl. Table 2). There were no differences noted in the prescribing and treatment gaps for hypertension when male and female patients were considered separately (data not shown).

### 3.4 Dyslipidaemia

The majority of patients in both age groups had abnormal lipid profiles but a greater proportion of patients in the younger than older age group had dyslipidaemia (Table 1, Figure 1). On univariable analysis, age, diabetes duration, gender, smoking, BMI and HbA1c were associated with dyslipidaemia. The unadjusted and adjusted odds ratios [95%CI] for dyslipidaemia were 2.41 [1.91-3.03],  $p < 0.001$  and 2.02 [1.53-2.68],  $p < 0.001$  respectively for younger patients compared with older patients (Table 2).

1  
2  
3 The overall study population prescribing and treatment gaps for dyslipidaemia were 22% and  
4 60% respectively (Figure 2). Younger patients with dyslipidaemia were more likely to not be  
5 on lipid lowering medication (prescribing gap) than older patients with dyslipidaemia after  
6 adjustment for diabetes duration, gender, smoking, renal function and vascular disease  
7 (adjusted OR 1.48 [1.15-1.90],  $p = 0.002$ ) (Suppl. Table 2). There were no differences noted  
8 in the prescribing and treatment gaps for dyslipidaemia when male and female patients were  
9 considered separately (data not shown).  
10  
11  
12  
13  
14  
15  
16  
17  
18  
19  
20  
21

### 22 *3.5 Obesity*

23  
24 Mean BMI was  $34.5 \pm 8.4 \text{ kg/m}^2$  and  $32.4 \pm 6.7 \text{ kg/m}^2$  for the younger and older age groups  
25 respectively ( $p < 0.001$ ). A greater proportion of patients in the younger age group had a BMI  
26 in the obese category ( $>30 \text{ kg/m}^2$ ) compared with the older age group (Table 1, Figure 2). On  
27 univariable analysis, age, gender and smoking were all associated with obesity. The  
28 unadjusted and adjusted odds ratios for obesity were 1.26 [1.09-1.46],  $p = 0.002$  and 1.25  
29 [1.05-1.49],  $p = 0.002$  respectively for younger patients compared with older (Table 2).  
30  
31  
32  
33  
34  
35  
36  
37  
38  
39

### 40 *3.6 Smoking*

41  
42 A greater proportion of patients in the younger age group reported being a current smoker  
43 compared with older patients (Table 1, Figure 1). On univariable analysis, age, diabetes  
44 duration, gender, BMI and renal function were all associated with current smoking. The  
45 unadjusted and adjusted odds ratios for current smoking were 2.60 [2.09-3.22],  $p < 0.001$  and  
46 2.13 [1.64-2.77],  $p < 0.001$  respectively for younger patients compared with older patients  
47 (Table 2).  
48  
49  
50  
51  
52  
53  
54  
55  
56  
57  
58  
59  
60

### 3.7 Sensitivity analysis

When patients with diabetes duration of 2 years or less (who may have not yet had opportunity to modify treatment practices and achieve targets) were excluded the associations were unchanged. Younger patients were still more likely to have an HbA1c over 7.0% (adjusted OR 1.59 [1.27-2.00],  $p<0.001$ ), dyslipidaemia (adjusted OR 1.89 [1.41-2.53],  $p<0.001$ ), be obese (adjusted OR 1.28 [1.06-1.55],  $p=0.010$ ) and smokers (adjusted OR 2.19 [1.64-2.92],  $p<0.001$ ) than older patients after adjusting for diabetes duration, gender, renal function, BMI and HbA1c where appropriate (Suppl. Table 3). Furthermore, the associations were similar when we adjusted the models for centre type (Suppl. Table 4).

## 4. Discussion

In this large national cross-sectional study of community-living patients with type 2 diabetes, we found that younger patients with significantly shorter disease duration were less likely to achieve recommended targets for glycaemic control, blood pressure and lipids than older patients. Younger patients were also more likely to be obese and to smoke. Of patients not achieving glycaemic, blood pressure, and lipid targets, younger rather than older patients were more likely to not be on therapy after adjustment for other relevant confounders. These findings remained after exclusion of patients with more recent diabetes onset who may have been relatively new to diabetes services and not yet had opportunity to attain treatment targets.

It is not clear why younger patients demonstrate poorer glycaemic control than older patients. Some evidence suggests that early-onset type 2 diabetes may be a more aggressive phenotype than later-onset type 2 diabetes, representing a greater predisposition to beta cell failure and diagnosis at an earlier age (16). Since younger patients had higher rates of obesity compared



1  
2  
3 with older patients, this may have contributed to worsening insulin resistance, and a need for  
4 greater intensification of therapy to achieve optimal glycaemic control. Longer duration of  
5 diabetes is also known to be associated with poorer glycaemic control, possibly due to  
6 progressive  $\beta$ -cell impairment and reduced insulin secretion (17), which in turn reduces the  
7 effectiveness of diet alone or oral agents. However, in our study the younger age group had a  
8 shorter diabetes duration than the older age group such that longer disease duration could not  
9 explain the poorer glycaemic control.  
10  
11  
12  
13  
14  
15  
16  
17  
18  
19

20 The high prevalence of poor glycaemic control and adverse cardiovascular risk factors  
21 observed in younger patients is of great concern as cardiovascular disease accounts for over  
22 half of the mortality among people with type 2 diabetes (18, 19). Given the risk for  
23 cardiovascular disease doubles when hypertension is also present in people with diabetes (20)  
24 and over a quarter of the patients in the younger age group had either systolic or diastolic  
25 hypertension, a review of the intensity of management is in order. This is supported by the  
26 larger prescribing and treatment gaps observed in the younger rather than older patients. In  
27 contrast, for older patients it is possible that clinicians' concerns regarding hypotension and  
28 postural symptoms due to autonomic neuropathy may appropriately limit antihypertensive  
29 use.  
30  
31  
32  
33  
34  
35  
36  
37  
38  
39  
40  
41  
42  
43

44 Although the absolute differences in the lipid variables were not large between the younger  
45 and older age groups, it is noteworthy that among younger patients and in line with other  
46 international studies, 89% had abnormal lipids (21). High density cholesterol levels,  
47 considered the best lipid predictor of cardiovascular disease (22), were significantly lower  
48 and triglyceride levels significantly higher in younger patients compared with older patients  
49 suggestive of inadequate lipid management. The relative insulin deficiency seen in type 2  
50  
51  
52  
53  
54  
55  
56  
57  
58  
59  
60

1  
2  
3 diabetes is known to impair the action of lipoprotein lipase, resulting in lower HDL levels  
4 and higher triglyceride levels. However, the lower HDL and higher triglyceride observed in  
5 younger patients cannot be attributed solely to the effect of hyperglycaemia as younger age  
6 remained independently associated with dyslipidaemia when HbA1c was included in the  
7 multivariable model. Another possible explanation is survivor effect bias whereby patients  
8 with normal lipid levels have survived longer (and into the older age group) compared with  
9 those with dyslipidaemia.  
10  
11  
12  
13  
14  
15  
16  
17  
18  
19

20 It is recognised that estimates of absolute cardiovascular risk (even for those with diabetes)  
21 are driven predominantly by age rather than modifiable risk factors (23). Indeed, in our study  
22 the majority of patients in the younger age group would have low absolute cardiovascular risk  
23 despite significant risk factor burden. The Global Burden of Disease study reported that the  
24 maximum impact in terms of healthy life-years gained or disability adjusted life years averted  
25 with cardiovascular preventive therapies would be observed between 55-64 years (24).  
26  
27  
28  
29  
30  
31  
32

33 However, vascular complications develop over many decades from a young age (25), well  
34 before presentation with a potentially fatal event. Additionally, younger patients have higher  
35 modifiable risk (risk factors amenable to treatment) and longer future lifetime exposure for  
36 any particular absolute risk level when compared to older people. As highlighted by our  
37 findings, a major outstanding challenge is how best to implement use of evidence-based  
38 preventive therapies in younger patients and to effectively communicate risk of future events.  
39  
40  
41  
42  
43  
44  
45

46 Among newer approaches are the concepts of heart or vascular age (26) and of lifetime or  
47 modifiable risk, particularly in younger patients. This is consistent with the American College  
48 of Cardiology /American Heart Association (ACC/AHA) guidelines recommending  
49 assessment of lifetime risk in younger patients in addition to the traditional absolute risk  
50 assessment (27).  
51  
52  
53  
54  
55  
56  
57  
58  
59  
60

1  
2  
3  
4  
5 Other explanations for our findings include that younger patients may face more hurdles to  
6 glucose testing, regular physical activity, healthy diet, and medication adherence whereas  
7 older patients may access medical care more frequently, may be more motivated to manage  
8 their medical conditions and may be more compliant with diet and medications (28-30).

9  
10  
11  
12  
13 Further research is required to understand the barriers to better glycaemic control and  
14 cardiovascular risk profiles faced by younger patients. These data are crucial to inform  
15 strategies to assist weight reduction, lifestyle modification and escalation of glycaemic, anti-  
16 hypertensive and lipid lowering therapies. Such measures would particularly benefit younger  
17 patients with type 2 diabetes, given that the incidence of macrovascular complications and  
18 mortality increases with diabetes duration (7) and is reduced with management of glycaemia  
19 and cardiovascular risk factors (18, 19). Good glycaemic control earlier in the course of  
20 diabetes may also be imperative, as this is demonstrated to reduce complications in the long  
21 term (31).  
22  
23  
24  
25  
26  
27  
28  
29  
30  
31  
32  
33  
34

35 The proportion of patients with hypertension and dyslipidaemia in our study was similar to  
36 that reported in the population-based AusDiab study. However, the proportion of patients  
37 overall with an HbA1c target  $\leq 7.0\%$  was greater in our study than in the AusDiab study (32)  
38 and the community-based Fremantle Diabetes Study (8). In our study younger patients had  
39 poorer glycaemic control with a mean diabetes duration approximately half that of older  
40 patients. Higher HbA1c levels have previously been independently associated with younger  
41 age (8). In contrast, the Australian general practice based NEFRON study, found that younger  
42 and more obese patients with a longer duration of diabetes had poor glycaemic control (9).  
43  
44  
45  
46  
47  
48  
49  
50  
51  
52 The differences in these studies may be due to the varying sampling frames and population  
53 characteristics.  
54  
55  
56  
57  
58  
59  
60

1  
2  
3  
4  
5 Similar to other studies investigating gender differences in the management of type 2 diabetes,  
6  
7 we found that female patients were more likely to report poorer glycaemic control and higher  
8  
9 rates of obesity than males (33). However, contrary to other studies from Germany (34) and  
10  
11 Italy (35), male and female patients appeared to experience similar prescribing and treatment  
12  
13 gaps of hypertension and dyslipidaemia in Australia. This maybe due to due to cultural,  
14  
15 behavioural, psychosocial and/or socio-economic differences between these countries  
16  
17 affecting access to healthcare and uptake of preventive measures.  
18  
19  
20  
21

22 A strength of this analysis is the large dataset of patients from a nation-wide survey. Data  
23  
24 were sourced from over half of the centres registered with the National Association of  
25  
26 Diabetes centres (NADC) at the time. The participants of our study are likely to be similar to  
27  
28 patients attending diabetes clinics throughout Australia. We obtained information on a broad  
29  
30 range of variables with potential impact on glycaemic, blood pressure and lipid control. Study  
31  
32 limitations include that the majority of patients were receiving care at tertiary diabetes centres  
33  
34 and may largely represent a specialist referred patient group. Referral bias is also possible.  
35  
36 General practitioners may be more likely to refer younger patients whilst managing older  
37  
38 patients with shorter diabetes duration. Alternatively, older patients with longer diabetes  
39  
40 duration and interrelating co-morbid conditions may also be more likely to be referred to  
41  
42 specialist services. Another limitation was the reliance on self/healthcare worker reports as  
43  
44 we were unable to independently verify diagnoses and treatments. This is unlikely to change  
45  
46 the findings substantively, given previous studies have found approximately 90% of self-  
47  
48 reported diabetes information to be valid (36). We were unable to conduct longitudinal  
49  
50 analyses as the data were de-identified and the cross-sectional nature of the analysis  
51  
52 precluded investigation of causality.  
53  
54  
55  
56  
57  
58  
59  
60

## 5. Conclusion

In summary, younger patients with type 2 diabetes attending diabetes centres are burdened by poorer glycaemic control and cardiovascular risk factor profiles compared with older patients. Of patients not achieving glycaemic, blood pressure, and lipid targets, younger patients were significantly more likely to not be on therapy or be above target despite treatment than older patients. Younger patients with diabetes may benefit from more targeted, evidence-based, multi-disciplinary initiatives to achieve and maintain intensive glycaemic control and optimise cardiovascular risk factors. Such measures may minimise the incidence and severity of diabetes related complications in younger patients with type 2 diabetes, thereby reducing morbidity and mortality.

## Acknowledgements

We thank the participating diabetes centres for their time and generous contribution to the Australian National Diabetes Audit.

## Authors' Contributions

NN: study design, literature review, statistical analysis, critical discussion, drafting and revision of the manuscript

AG: statistical analysis, critical discussion, revision of the manuscript

SR: statistical analysis and interpretation of the data, revision of the manuscript

WD: critical revision of the manuscript

JF: critical revision of the manuscript

NW: study conception and design, revision of the manuscript

SA: study conception and design, critical revision of the manuscript

SZ: study conception and design, design of analyses, critical revision of the manuscript, supervision of the project.

The authors NN, SR, and SZ had full access to the data and take responsibility for the integrity of the data and accuracy of the analysis. All authors have read and approved the final manuscript.

## Funding

The Commonwealth Department of Health and Ageing funds the Australian National Diabetes Audit. This research has received no specific grant from any other funding agency in the public, commercial or not-for profit sectors.

## Data Sharing Statement

1  
2  
3 Application for datasets generated during and/or analysed during the current study may be  
4 considered by the corresponding author on reasonable request.  
5  
6

#### 7 Competing interests

8  
9  
10 W. Davis reports past participation in advisory boards and/or receiving honoraria from Novo  
11 Nordisk and Eli Lilly Australia. N. Wischer reports past participation in advisory boards  
12 and/or receiving honoraria from AstraZeneca Pty Ltd/, Eli Lilly Australia, Merck Sharp &  
13 Dohme (Australia) Pty Ltd, Sanofi Aventis Pty Ltd, Novo Nordisk. S Andrikopoulos reports  
14 past participation in advisory boards and/or receiving honoraria from GlaxoSmithKline Pty  
15 Ltd, Novartis Pty Ltd, AstraZeneca Pty Ltd/Bristol-Myers Squibb Australia Pty Ltd, Eli Lilly  
16 Australia, Janssen Cilag Pty Ltd, Merck Sharp & Dohme (Australia) Pty Ltd, Sanofi Aventis  
17 Pty Ltd, Novo Nordisk, Servier Laboratories Pty Ltd S Zoungas reports past participation in  
18 advisory boards/contract work on behalf of Monash University with AstraZeneca Pty Ltd,  
19 Merck Sharp & Dohme (Australia) Pty Ltd and Novo Nordisk Pty Ltd. S Zoungas holds a  
20 NHMRC senior research fellowship.  
21  
22  
23  
24  
25  
26  
27  
28  
29  
30  
31  
32  
33  
34  
35  
36  
37  
38  
39  
40  
41  
42  
43  
44  
45  
46  
47  
48  
49  
50  
51  
52  
53  
54  
55  
56  
57  
58  
59  
60

## References

1. Guariguata L, Whiting D, Hambleton I, Beagley J, Linnenkamp U, Shaw J. Global estimates of diabetes prevalence for 2013 and projections for 2035. *Diabetes research and clinical practice*. 2014;103(2):137-49.
2. Rahelic D. [7th Edition of Idf Diabetes Atlas--Call for Immediate Action]. *Lijecnicki vjesnik*. 2016;138(1-2):57-8.
3. Song SH, Hardisty CA. Early-onset Type 2 diabetes mellitus: an increasing phenomenon of elevated cardiovascular risk. *Expert Rev Cardiovasc Ther*. 2008;6(3):315-22.
4. Welfare ALOHa. Deaths from diabetes: Australian Institute of Health and Welfare; 2017 [cited 2017]. Available from: <http://www.aihw.gov.au/diabetes/deaths/>.
5. Group IDFDA. Update of mortality attributable to diabetes for the IDF Diabetes Atlas: estimates for the year 2011. *Diabetes Res Clin Pract*. 2013;100(2):277-9.
6. Menke A, Casagrande S, Geiss L, Cowie CC. Prevalence of and Trends in Diabetes Among Adults in the United States, 1988-2012. *Jama*. 2015;314(10):1021-9.
7. Zoungas S, Woodward M, Li Q, Cooper ME, Hamet P, Harrap S, et al. Impact of age, age at diagnosis and duration of diabetes on the risk of macrovascular and microvascular complications and death in type 2 diabetes. *Diabetologia*. 2014;57(12):2465-74.
8. Skinner TC, Bruce DG, Davis TM, Davis WA. Personality traits, self-care behaviours and glycaemic control in type 2 diabetes: the Fremantle diabetes study phase II. *Diabet Med*. 2014;31(4):487-92.
9. Macisaac RJ, Jerums G, Weekes AJ, Thomas MC. Patterns of glycaemic control in Australian primary care (NEFRON 8). *Internal medicine journal*. 2009;39(8):512-8.
10. El-Kebbi IM, Cook CB, Ziemer DC, Miller CD, Gallina DL, Phillips LS. Association of younger age with poor glycemic control and obesity in urban african americans with type 2 diabetes. *Archives of internal medicine*. 2003;163(1):69-75.
11. Smith NL, Heckbert SR, Bittner VA, Savage PJ, Barzilay JI, Dobs AS, et al. Antidiabetic treatment trends in a cohort of elderly people with diabetes. The cardiovascular health study, 1989-1997. *Diabetes care*. 1999;22(5):736-42.
12. Shorr RI, Franse LV, Resnick HE, Di Bari M, Johnson KC, Pahor M. Glycemic control of older adults with type 2 diabetes: findings from the Third National Health and Nutrition Examination Survey, 1988-1994. *Journal of the American Geriatrics Society*. 2000;48(3):264-7.
13. Health Do. Australian National Diabetes Audit (ANDA): Commonwealth of Australia; 2017 [updated 16 May 2017; cited 2017 17/6/2017]. Available from: <http://www.health.gov.au/internet/main/publishing.nsf/content/pq-diabetes-pubs>.
14. Levey AS, Bosch JP, Lewis JB, Greene T, Rogers N, Roth D. A more accurate method to estimate glomerular filtration rate from serum creatinine: a new prediction equation. Modification of Diet in Renal Disease Study Group. *Annals of internal medicine*. 1999;130(6):461-70.
15. O'Callaghan CJ, Rong P, Goh MY. National guidelines for the management of absolute cardiovascular disease risk. *Med J Aust*. 2014;200(8):454, 6.
16. Song SH, Hardisty CA. Early onset type 2 diabetes mellitus: a harbinger for complications in later years--clinical observation from a secondary care cohort. *Qjm*. 2009;102(11):799-806.
17. Saad MF, Knowler WC, Pettitt DJ, Nelson RG, Mott DM, Bennett PH. Sequential changes in serum insulin concentration during development of non-insulin-dependent diabetes. *Lancet*. 1989;1(8651):1356-9.
18. Cea Soriano L, Johansson S, Stefansson B, Rodriguez LA. Cardiovascular events and all-cause mortality in a cohort of 57,946 patients with type 2 diabetes: associations with renal function and cardiovascular risk factors. *Cardiovascular diabetology*. 2015;14:38.
19. Chen YY, Lin YJ, Chong E, Chen PC, Chao TF, Chen SA, et al. The impact of diabetes mellitus and corresponding HbA1c levels on the future risks of cardiovascular disease and mortality: a representative cohort study in Taiwan. *PloS one*. 2015;10(4):e0123116.



20. American Diabetes A. Treatment of hypertension in adults with diabetes. *Diabetes care*. 2002;25(1):199-201.
21. Hillier TA, Pedula KL. Characteristics of an adult population with newly diagnosed type 2 diabetes: the relation of obesity and age of onset. *Diabetes care*. 2001;24(9):1522-7.
22. Ingelsson E, Schaefer EJ, Contois JH, McNamara JR, Sullivan L, Keyes MJ, et al. Clinical utility of different lipid measures for prediction of coronary heart disease in men and women. *Jama*. 2007;298(7):776-85.
23. Zoungas S, Curtis A, Tonkin A, McNeil J. Statins in the elderly: an answered question? *Current opinion in cardiology*. 2014;29(4):372-80.
24. Murray CJ, Lauer JA, Hutubessy RC, Niessen L, Tomijima N, Rodgers A, et al. Effectiveness and costs of interventions to lower systolic blood pressure and cholesterol: a global and regional analysis on reduction of cardiovascular-disease risk. *Lancet*. 2003;361(9359):717-25.
25. Berenson GS, Srinivasan SR, Xu JH, Chen W. Adiposity and Cardiovascular Risk Factor Variables in Childhood Are Associated With Premature Death From Coronary Heart Disease in Adults: The Bogalusa Heart Study. *The American journal of the medical sciences*. 2016;352(5):448-54.
26. Vasani RS, Kannel WB. Strategies for cardiovascular risk assessment and prevention over the life course: progress amid imperfections. *Circulation*. 2009;120(5):360-3.
27. Goff DC, Jr., Lloyd-Jones DM, Bennett G, Coady S, D'Agostino RB, Sr., Gibbons R, et al. 2013 ACC/AHA guideline on the assessment of cardiovascular risk: a report of the American College of Cardiology/American Heart Association Task Force on Practice Guidelines. *Journal of the American College of Cardiology*. 2014;63(25 Pt B):2935-59.
28. Adekoya N. Patients seen in emergency departments who had a prior visit within the previous 72 h-National Hospital Ambulatory Medical Care Survey, 2002. *Public health*. 2005;119(10):914-8.
29. Bezie Y, Molina M, Hernandez N, Batista R, Niang S, Huet D. Therapeutic compliance: a prospective analysis of various factors involved in the adherence rate in type 2 diabetes. *Diabetes & metabolism*. 2006;32(6):611-6.
30. Ahmad NS, Ramli A, Islahudin F, Paraidathathu T. Medication adherence in patients with type 2 diabetes mellitus treated at primary health clinics in Malaysia. *Patient preference and adherence*. 2013;7:525-30.
31. Zoungas S, Chalmers J, Neal B, Billot L, Li Q, Hirakawa Y, et al. Follow-up of blood-pressure lowering and glucose control in type 2 diabetes. *The New England journal of medicine*. 2014;371(15):1392-406.
32. Tanamas S, Magliano D, Lynch BM, Willenberg L, Polkinghorne KR, Chadban S, et al. AusDiab 2012. *The Australian Diabetes, Obesity and Lifestyle Study*. Melbourne: Baker IDI Heart and Diabetes Institute; 2012.
33. Anand SS, Islam S, Rosengren A, Franzosi MG, Steyn K, Yusufali AH, et al. Risk factors for myocardial infarction in women and men: insights from the INTERHEART study. *Eur Heart J*. 2008;29(7):932-40.
34. Gouni-Berthold I, Berthold HK, Mantzoros CS, Bohm M, Krone W. Sex disparities in the treatment and control of cardiovascular risk factors in type 2 diabetes. *Diabetes Care*. 2008;31(7):1389-91.
35. Penno G, Solini A, Bonora E, Fondelli C, Orsi E, Zerbini G, et al. Gender differences in cardiovascular disease risk factors, treatments and complications in patients with type 2 diabetes: the RIACE Italian multicentre study. *J Intern Med*. 2013;274(2):176-91.
36. Kahn LB, Marshall JA, Baxter J, Shetterly SM, Hamman RF. Accuracy of reported family history of diabetes mellitus. Results from San Luis Valley Diabetes Study. *Diabetes care*. 1990;13(7):796-8.

## Tables and Figures

**Table 1:** Characteristics of study participants

| Characteristic*                                | Age                 |                     | p value |
|------------------------------------------------|---------------------|---------------------|---------|
|                                                | <60 years<br>n=1328 | ≥60 years<br>n=2164 |         |
| Age to 2015 (years)                            | 50.1 (8.4)          | 70.7 (7.0)          | <0.001  |
| Male                                           | 650 (49.5)          | 1208 (56.5)         | <0.001  |
| Age when diabetes first diagnosed (years)      | 40.6 (9.4)          | 54.9 (10.6)         | <0.001  |
| Diabetes duration (years)                      | 9.6 (7.5)           | 15.9 (9.6)          | <0.001  |
| HbA1c (%)                                      | 8.6 (2.1)           | 8.0 (1.6)           | <0.001  |
| <u>Cardiovascular risk factors</u>             |                     |                     |         |
| Systolic blood pressure (mmHg)                 | 130.5 (18.1)        | 134.1 (18.6)        | <0.001  |
| Diastolic blood pressure (mmHg)                | 77.7 (10.5)         | 72.6 (10.2)         | <0.001  |
| Current smoker                                 | 235 (20.2)          | 161 (8.9)           |         |
| Past smoker                                    | 350 (30.1)          | 713 (39.4)          | <0.001  |
| Never smoker                                   | 577 (49.7)          | 936 (51.7)          |         |
| Total cholesterol (mmol/l)                     | 4.6 (1.3)           | 4.0 (1.1)           | <0.001  |
| LDL-cholesterol (mmol/l)                       | 2.4 (1.6)           | 2.0 (0.9)           | <0.001  |
| HDL-cholesterol (mmol/l)                       | 1.1 (0.4)           | 1.1 (0.4)           | 0.010   |
| Triglyceride (mmol/l)                          | 2.5 (2.4)           | 2.1 (1.7)           | <0.001  |
| Serum creatinine (μmol/l)                      | 89.5 (91.7)         | 109.5 (91.3)        | <0.001  |
| eGFR ml/min/1.73m <sup>2</sup>                 | 89.3 (35.9)         | 65.9 (27.1)         | <0.001  |
| Body Mass Index (kg/m <sup>2</sup> )           | 34.5 (8.4)          | 32.4 (6.7)          | <0.001  |
| <u>Treatments</u>                              |                     |                     |         |
| Diet alone                                     | 65 (4.9)            | 77 (3.6)            | 0.052   |
| Oral glucose lowering agents                   | 1050 (79.1)         | 1634 (75.5)         | 0.013   |
| Non-insulin injectable glucose lowering agents | 94 (7.1)            | 98 (4.5)            | 0.003   |
| Insulin                                        | 769 (57.9)          | 1348 (62.3)         | 0.010   |
| <u>Cardiovascular disease</u>                  |                     |                     |         |
| Microvascular complications                    | 414 (35.3)          | 950 (49.3)          | <0.001  |
| Macrovascular complications                    | 247 (21.6)          | 847 (43.4)          | <0.001  |

\* categorical variables were presented as n (%) and continuous variables as mean (SD) or median (IQR), as appropriate

# categorical variables were assessed with the Chi square test. Continuous variables were tested for normality, analyses were performed using ANOVA for normally distributed data and Mann-Whitney U tests for non-normally distributed data

Microvascular complications defined as retinopathy, nephropathy or peripheral neuropathy

Macrovascular complications defined as either cardiovascular, cerebrovascular or peripheral vascular disease

1  
2  
3  
4  
5  
6  
7  
8  
9  
10  
11  
12  
13  
14  
15  
16  
17  
18  
19  
20  
21  
22  
23  
24  
25  
26  
27  
28  
29  
30  
31  
32  
33  
34  
35  
36  
37  
38  
39  
40  
41  
42  
43  
44  
45  
46  
47  
48  
49  
50  
51  
52  
53  
54  
55  
56  
57  
58  
59  
60

For peer review only

**Table 2:** Unadjusted and adjusted odds of factors associated with suboptimal glycaemic control and adverse cardiovascular risk factor levels.

|                                                   | HbA1c above target<br>(7.0%, 53 mmol/mol) |         | Hypertension                             |         | Dyslipidaemia                            |         | Obesity                                  |         | Current Smoker                           |         |                     |        |                     |        |                     |        |                     |        |                     |        |
|---------------------------------------------------|-------------------------------------------|---------|------------------------------------------|---------|------------------------------------------|---------|------------------------------------------|---------|------------------------------------------|---------|---------------------|--------|---------------------|--------|---------------------|--------|---------------------|--------|---------------------|--------|
|                                                   | Univariable<br>Analysis<br>OR<br>(95%CI)  | p value | Univariable<br>Analysis<br>OR<br>(95%CI) | p value | Univariable<br>Analysis<br>OR<br>(95%CI) | p value | Univariable<br>Analysis<br>OR<br>(95%CI) | p value | Univariable<br>Analysis<br>OR<br>(95%CI) | p value |                     |        |                     |        |                     |        |                     |        |                     |        |
| <b>Age</b>                                        |                                           |         |                                          |         |                                          |         |                                          |         |                                          |         |                     |        |                     |        |                     |        |                     |        |                     |        |
| ≥60 y (ref)                                       |                                           |         |                                          |         |                                          |         |                                          |         |                                          |         |                     |        |                     |        |                     |        |                     |        |                     |        |
| <60 y                                             | 1.26<br>(1.07-1.49)                       | 0.005   | 1.50<br>(1.22-1.84)                      | <0.001  | 0.81<br>(0.70-0.95)                      | 0.008   | 0.85<br>(0.70-1.04)                      | 0.119   | 2.41<br>(1.91-3.03)                      | <0.001  | 2.02<br>(1.53-2.68) | <0.001 | 1.26<br>(1.09-1.46) | 0.002  | 1.25<br>(1.05-1.49) | 0.011  | 2.60<br>(2.09-3.22) | <0.001 | 2.13<br>(1.64-2.77) | <0.001 |
| <b>Duration of Diabetes</b>                       |                                           |         |                                          |         |                                          |         |                                          |         |                                          |         |                     |        |                     |        |                     |        |                     |        |                     |        |
| <10 y (ref)                                       |                                           |         |                                          |         |                                          |         |                                          |         |                                          |         |                     |        |                     |        |                     |        |                     |        |                     |        |
| ≥10 y                                             | 2.05<br>(1.74-2.40)                       | <0.001  | 2.51<br>(2.07-3.03)                      | <0.001  | 1.16<br>(0.99-1.35)                      | 0.067   | 1.03<br>(0.85-1.25)                      | 0.735   | 0.66<br>(0.53-0.81)                      | <0.001  | 0.79<br>(0.60-1.03) | 0.087  | 1.04<br>(0.90-1.20) | 0.597  |                     |        | 0.59<br>(0.48-0.73) | <0.001 | 0.82<br>(0.64-1.06) | 0.124  |
| <b>Sex</b>                                        |                                           |         |                                          |         |                                          |         |                                          |         |                                          |         |                     |        |                     |        |                     |        |                     |        |                     |        |
| Male (ref)                                        |                                           |         |                                          |         |                                          |         |                                          |         |                                          |         |                     |        |                     |        |                     |        |                     |        |                     |        |
| Female                                            | 1.18<br>(1.01-1.38)                       | 0.039   | 1.16<br>(0.97-1.39)                      | 0.100   | 1.02<br>(0.88-1.18)                      | 0.828   | 0.87<br>(0.73-1.04)                      | 0.129   | 0.76<br>(0.62-0.92)                      | 0.005   | 0.70<br>(0.55-0.90) | 0.005  | 1.34<br>(1.16-1.54) | <0.001 | 1.38<br>(1.16-1.63) | <0.001 | 0.70<br>(0.56-0.87) | 0.001  | 0.70<br>(0.55-0.89) | 0.004  |
| <b>Smoking</b>                                    |                                           |         |                                          |         |                                          |         |                                          |         |                                          |         |                     |        |                     |        |                     |        |                     |        |                     |        |
| Never (ref)                                       |                                           |         |                                          |         |                                          |         |                                          |         |                                          |         |                     |        |                     |        |                     |        |                     |        |                     |        |
| Past                                              | 1.09<br>(0.9-1.32)                        | 0.368   |                                          |         | 0.93<br>(0.79-1.10)                      | 0.418   | 0.90<br>(0.74-1.09)                      | 0.287   | 1.10<br>(0.87-1.38)                      | 0.419   | 1.01<br>(0.77-1.32) | 0.947  | 1.44<br>(1.22-1.71) | <0.001 | 1.63<br>(1.35-1.96) | <0.001 |                     |        |                     |        |
| Current                                           | 1.09<br>(0.84-1.42)                       | 0.512   |                                          |         | 0.65<br>(0.50-0.84)                      | 0.001   | 0.72<br>(0.54-0.96)                      | 0.024   | 1.73<br>(1.18-2.52)                      | 0.005   | 1.32<br>(0.87-1.99) | 0.187  | 0.93<br>(0.74-1.17) | 0.517  | 0.92<br>(0.72-1.18) | 0.525  |                     |        |                     |        |
| <b>eGFR (ml/min/1.73m<sup>2</sup>) (per unit)</b> | 1.00<br>(0.99-1.00)                       | 0.073   | 1.00<br>(1.00-1.01)                      | 0.034   | 1.00<br>(0.99-1.00)                      | 0.001   | 1.00<br>(0.99-1.00)                      | 0.008   | 1.00<br>(1.00-1.01)                      | 0.144   |                     |        | 1.00<br>(1.00-1.00) | 0.307  |                     |        | 1.01<br>(1.01-1.01) | <0.001 | 1.01<br>(1.00-1.01) | 0.001  |
| <b>BMI (kg/m<sup>2</sup>) (per unit)</b>          | 1.03<br>(1.02-1.04)                       | <0.001  | 1.03<br>(1.02-1.04)                      | <0.001  | 1.02<br>(1.01-1.03)                      | <0.001  | 1.02<br>(1.01-1.03)                      | 0.001   | 1.02<br>(1.01-1.04)                      | 0.004   | 1.02<br>(1.00-1.03) | 0.077  |                     |        |                     |        | 0.98<br>(0.97-1.00) | 0.017  | 0.97<br>(0.95-0.99) | 0.001  |
| <b>HbA1c (%) (per unit)</b>                       |                                           |         |                                          |         | 1.03<br>(0.99-1.07)                      | 0.156   |                                          |         | 1.18<br>(1.11-1.26)                      | <0.001  | 1.14<br>(1.05-1.23) | 0.001  | 1.07<br>(1.03-1.12) | 0.001  | 1.05<br>(1.00-1.10) | 0.049  |                     |        |                     |        |

\*Multivariable analyses are, where appropriate, adjusted for gender, diabetes duration, smoking, estimated glomerular filtration rates, body mass index and HbA1c.

#Hypertension is defined as systolic blood pressure >140mmHg and/or diastolic blood pressure >90 mmHg

†Dyslipidaemia is defined as either total cholesterol >4.0 mmol/L, high density lipoprotein <1.0 mmol/L, low density lipoprotein >2.0 mmol/L or triglycerides >2.0 mmol/L

‡Obesity is defined as Body Mass Index >30 kg/m<sup>2</sup>

1 **Figure 1:** Risks of adverse cardiovascular risk factor levels in patients with type 2 diabetes by age group  
2  
3  
4  
5  
6  
7  
8  
9  
10  
11  
12  
13  
14  
15  
16  
17  
18  
19  
20  
21  
22  
23  
24  
25  
26  
27  
28  
29  
30  
31  
32

For peer review only

33 **Figure 2:** Blood pressure (i) and lipid management (ii) gaps in patients with type 2 diabetes  
34  
35  
36  
37  
38  
39  
40  
41  
42  
43  
44  
45  
46  
47

**Figure 1:** Risks of adverse cardiovascular risk factor levels in patients with type 2 diabetes by age group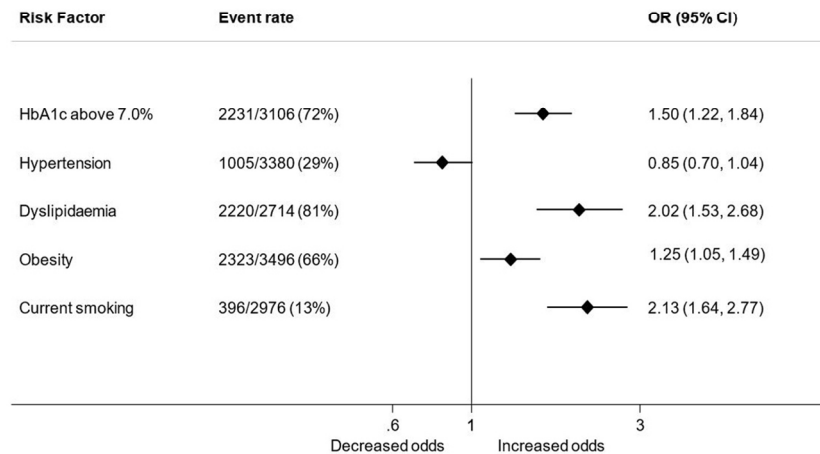

The diamonds refer to the odds ratios for patients aged <60 years compared to the reference group of patients aged ≥60 years for each of the outcomes listed. Multivariable analyses are, where appropriate, adjusted for gender, diabetes duration, smoking, estimated glomerular filtration rates, body mass index and HbA1c. Hypertension is defined as systolic blood pressure >140mmHg and/or diastolic blood pressure >90 mmHg. Dyslipidaemia is defined as either total cholesterol >4.0 mmol/L, high density lipoprotein <1.0 mmol/L, low density lipoprotein >2.0 mmol/L or triglycerides >2.0 mmol/L. Obesity is defined as Body Mass Index >30 kg/m<sup>2</sup>.

Figure 1: Risks of adverse cardiovascular risk factor levels in patients with type 2 diabetes by age group

116x76mm (300 x 300 DPI)

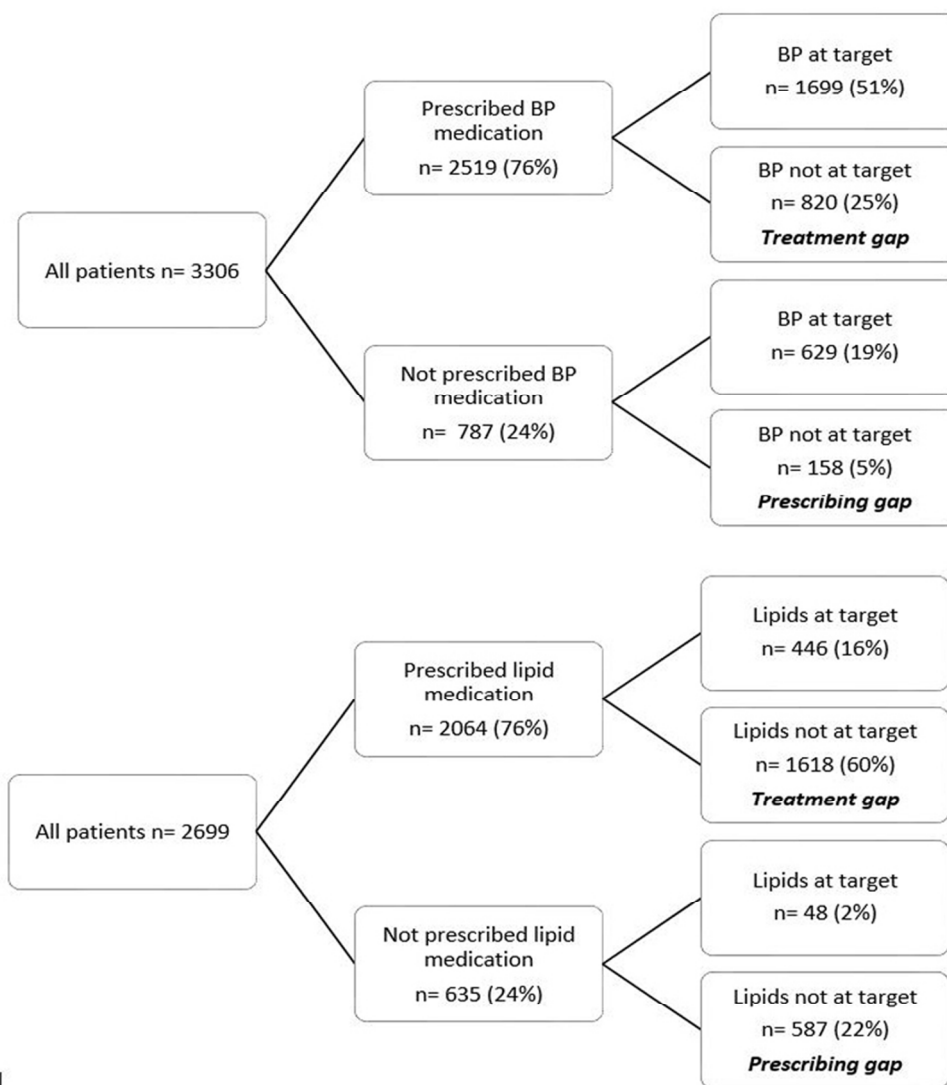

Figure 2: Blood pressure and lipid management gaps in patients with type 2 diabetes

76x85mm (300 x 300 DPI)

## Supplementary Tables

**Suppl. Table 1:** Number of participating diabetes centres and patients by state or territory

| State/Territory              | Participating centres | Number of patients included |
|------------------------------|-----------------------|-----------------------------|
| Australian Capital Territory | 1                     | 49                          |
| New South Wales              | 13                    | 1246                        |
| Northern Territory           | 1                     | 91                          |
| Queensland                   | 9                     | 758                         |
| South Australia              | 1                     | 44                          |
| Tasmania                     | 3                     | 140                         |
| Victoria                     | 20                    | 1119                        |
| Western Australia            | 1                     | 45                          |
| Total                        | 49                    | 3492                        |



**Suppl. Table 2:** Unadjusted and adjusted odds of variables associated with prescribing gaps

|                                          | <b>HbA1c &gt; 8.0% and not on insulin</b> |         |                        |         | <b>Hypertension and not on BP medication</b> |         |                        |         | <b>Dyslipidaemia and not on lipid medication</b> |         |                        |         |
|------------------------------------------|-------------------------------------------|---------|------------------------|---------|----------------------------------------------|---------|------------------------|---------|--------------------------------------------------|---------|------------------------|---------|
|                                          | Univariable Analysis                      |         | Multivariable Analysis |         | Univariable Analysis                         |         | Multivariable Analysis |         | Univariable Analysis                             |         | Multivariable Analysis |         |
|                                          | OR<br>(95% CI)                            | p value | OR<br>(95% CI)         | p value | OR<br>(95% CI)                               | p value | OR<br>(95% CI)         | p value | OR<br>(95% CI)                                   | p value | OR<br>(95% CI)         | p value |
| <b>Age (y)</b>                           |                                           |         |                        |         |                                              |         |                        |         |                                                  |         |                        |         |
| ≥60 (ref)                                |                                           |         |                        |         |                                              |         |                        |         |                                                  |         |                        |         |
| <60                                      | 1.23<br>(1.01-1.50)                       | 0.041   | 0.80<br>(0.61-1.04)    | 0.090   | 2.71<br>(1.91-3.83)                          | <0.001  | 1.84<br>(1.16-2.92)    | 0.010   | 2.17<br>(1.79-2.63)                              | <0.001  | 1.48<br>(1.15-1.90)    | 0.002   |
| <b>Duration of Diabetes (y)</b>          |                                           |         |                        |         |                                              |         |                        |         |                                                  |         |                        |         |
| <10 (ref)                                |                                           |         |                        |         |                                              |         |                        |         |                                                  |         |                        |         |
| ≥10                                      | 0.28<br>(0.23-0.35)                       | <0.001  | 0.28<br>(0.22-0.36)    | <0.001  | 0.39<br>(0.28-0.56)                          | <0.001  | 0.46<br>(0.29-0.71)    | 0.001   | 0.41<br>(0.34-0.50)                              | <0.001  | 0.54<br>(0.42-0.69)    | <0.001  |
| <b>Gender</b>                            |                                           |         |                        |         |                                              |         |                        |         |                                                  |         |                        |         |
| Male (ref)                               |                                           |         |                        |         |                                              |         |                        |         |                                                  |         |                        |         |
| Female                                   | 0.89<br>(0.73-1.08)                       | 0.239   | 0.87<br>(0.69-1.11)    | 0.260   | 0.96<br>(0.68-1.36)                          | 0.818   | 0.97<br>(0.62-1.51)    | 0.890   | 1.37<br>(1.13-1.66)                              | 0.001   | 1.19<br>(0.93-1.51)    | 0.160   |
| <b>Smoking</b>                           |                                           |         |                        |         |                                              |         |                        |         |                                                  |         |                        |         |
| Never (ref)                              |                                           |         |                        |         |                                              |         |                        |         |                                                  |         |                        |         |
| Past                                     | 0.83<br>(0.66-1.05)                       | 0.117   |                        |         | 0.57<br>(0.38-0.86)                          | 0.008   | 0.66<br>(0.41-1.09)    | 0.103   | 0.71<br>(0.57-0.90)                              | 0.005   | 0.76<br>(0.59-0.99)    | 0.043   |
| Current                                  | 0.97<br>(0.71-1.33)                       | 0.861   |                        |         | 1.57<br>(0.94-2.64)                          | 0.087   | 1.40<br>(0.74-2.65)    | 0.301   | 1.06<br>(0.78-1.44)                              | 0.711   | 1.03<br>(0.73-1.46)    | 0.856   |
| <b>eGFR (ml/min) (per unit)</b>          | 1.01<br>(1.00-1.01)                       | 0.001   | 1.00<br>(1.00-1.01)    | 0.049   | 1.02<br>(1.01-1.02)                          | <0.001  | 1.01<br>(1.00-1.01)    | 0.012   | 1.01<br>(1.01-1.01)                              | <0.001  | 1.01<br>(1.00-1.01)    | 0.005   |
| <b>BMI (kg/m<sup>2</sup>) (per unit)</b> | 0.98<br>(0.97-1.00)                       | 0.021   | 0.98<br>(0.96-0.99)    | 0.004   | 0.98<br>(0.96-1.00)                          | 0.100   | 0.95<br>(0.93-0.98)    | 0.002   | 0.99<br>(0.98-1.01)                              | 0.238   |                        |         |
| <b>HbA1c (%) (per unit)</b>              |                                           |         |                        |         | 1.05<br>(0.95-1.16)                          | 0.331   |                        |         | 0.98<br>(0.93-1.04)                              | 0.497   |                        |         |
| <b>Vascular disease</b>                  |                                           |         |                        |         |                                              |         |                        |         |                                                  |         |                        |         |
| No (ref)                                 |                                           |         |                        |         |                                              |         |                        |         |                                                  |         |                        |         |
| Yes                                      |                                           |         |                        |         | 0.37<br>(0.26-0.53)                          | <0.001  | 0.48<br>(0.31-0.75)    | 0.001   | 0.36<br>(0.29-0.44)                              | <0.001  | 0.51<br>(0.40-0.66)    | <0.001  |

\*Multivariable analyses are, where appropriate, adjusted for gender, diabetes duration, smoking, estimated glomerular filtration rates, body mass index and HbA1c.

#Hypertension is defined as systolic blood pressure >140mmHg and/or diastolic blood pressure >90 mmHg

†Dyslipidaemia is defined as either total cholesterol >4.0 mmol/L, high density lipoprotein <1.0 mmol/L, low density lipoprotein >2.0 mmol/L or triglycerides >2.0 mmol/L

**Suppl. Table 3:** Unadjusted and adjusted odds of variables associated with suboptimal glycaemic control and adverse cardiovascular risk factor levels, excluding patients with diabetes duration  $\leq 2$  years.

|                                                   | <b>HbA1c above target (7.0%, 53 mmol/mol)</b> |         |                        |         | <b>Hypertension</b>  |         |                        |         | <b>Dyslipidaemia</b> |         |                        |         | <b>Obesity</b>       |         |                        |         | <b>Current Smoker</b> |         |                        |         |
|---------------------------------------------------|-----------------------------------------------|---------|------------------------|---------|----------------------|---------|------------------------|---------|----------------------|---------|------------------------|---------|----------------------|---------|------------------------|---------|-----------------------|---------|------------------------|---------|
|                                                   | Univariable Analysis                          |         | Multivariable Analysis |         | Univariable Analysis |         | Multivariable Analysis |         | Univariable Analysis |         | Multivariable Analysis |         | Univariable Analysis |         | Multivariable Analysis |         | Univariable Analysis  |         | Multivariable Analysis |         |
|                                                   | OR (95% CI)                                   | p value | OR (95% CI)            | p value | OR (95% CI)          | p value | OR (95% CI)            | p value | OR (95% CI)          | p value | OR (95% CI)            | p value | OR (95% CI)          | p value | OR (95% CI)            | p value | OR (95% CI)           | p value | OR (95% CI)            | p value |
| <b>Age</b>                                        |                                               |         |                        |         |                      |         |                        |         |                      |         |                        |         |                      |         |                        |         |                       |         |                        |         |
| ≥60 y (ref)                                       |                                               |         |                        |         |                      |         |                        |         |                      |         |                        |         |                      |         |                        |         |                       |         |                        |         |
| <60 y                                             | 1.47 (1.22-1.77)                              | <0.001  | 1.59 (1.27-2.00)       | <0.001  | 0.88 (0.74-1.04)     | 0.122   | 0.90 (0.72-1.12)       | 0.339   | 2.17 (1.71-2.76)     | <0.001  | 1.89 (1.41-2.53)       | <0.001  | 1.31 (1.11-1.54)     | 0.001   | 1.28 (1.06-1.55)       | 0.010   | 2.50 (1.96-3.17)      | <0.001  | 2.19 (1.64-2.92)       | <0.001  |
| <b>Duration</b>                                   |                                               |         |                        |         |                      |         |                        |         |                      |         |                        |         |                      |         |                        |         |                       |         |                        |         |
| <10 y (ref)                                       |                                               |         |                        |         |                      |         |                        |         |                      |         |                        |         |                      |         |                        |         |                       |         |                        |         |
| ≥10 y                                             | 1.65 (1.37-1.98)                              | <0.001  | 2.05 (1.66-2.54)       | <0.001  | 1.10 (0.92-1.31)     | 0.295   |                        |         | 0.80 (0.63-1.01)     | 0.065   | 0.93 (0.70-1.25)       | 0.631   | 1.02 (0.86-1.21)     | 0.793   |                        |         | 0.71 (0.55-0.92)      | 0.009   | 1.00 (0.75-1.35)       | 0.983   |
| <b>Sex</b>                                        |                                               |         |                        |         |                      |         |                        |         |                      |         |                        |         |                      |         |                        |         |                       |         |                        |         |
| Male (ref)                                        |                                               |         |                        |         |                      |         |                        |         |                      |         |                        |         |                      |         |                        |         |                       |         |                        |         |
| Female                                            | 1.18 (0.99-1.40)                              | 0.062   | 1.18 (0.97-1.44)       | 0.093   | 1.05 (0.90-1.23)     | 0.555   | 0.96 (0.78-1.17)       | 0.657   | 0.75 (0.61-0.92)     | 0.006   | 0.70 (0.54-0.90)       | 0.006   | 1.29 (1.11-1.50)     | 0.001   | 1.35 (1.12-1.62)       | 0.001   | 0.74 (0.58-0.94)      | 0.015   | 0.77 (0.59-1.01)       | 0.060   |
| <b>Smoking</b>                                    |                                               |         |                        |         |                      |         |                        |         |                      |         |                        |         |                      |         |                        |         |                       |         |                        |         |
| Never (ref)                                       |                                               |         |                        |         |                      |         |                        |         |                      |         |                        |         |                      |         |                        |         |                       |         |                        |         |
| Past                                              | 1.08 (0.88-1.32)                              | 0.484   |                        |         | 0.92 (0.77-1.11)     | 0.387   | 0.97 (0.78-1.19)       | 0.748   | 1.08 (0.85-1.37)     | 0.539   | 0.97 (0.74-1.28)       | 0.853   | 1.51 (1.26-1.81)     | <0.001  | 1.69 (1.38-2.06)       | <0.001  |                       |         |                        |         |
| Current                                           | 1.22 (0.89-1.66)                              | 0.215   |                        |         | 0.68 (0.51-0.90)     | 0.006   | 0.74 (0.53-1.02)       | 0.062   | 1.46 (0.99-2.17)     | 0.058   | 1.18 (0.77-1.81)       | 0.446   | 0.95 (0.74-1.23)     | 0.712   | 0.90 (0.69-1.19)       | 0.468   |                       |         |                        |         |
| <b>eGFR (ml/min/1.73m<sup>2</sup>) (per unit)</b> | 1.00 (1.00-1.01)                              | 0.002   | 1.00 (1.00-1.01)       | 0.014   | 1.00 (0.99-1.00)     | 0.005   | 1.00 (0.99-1.00)       | 0.011   | 1.00 (1.00-1.00)     | 0.655   |                        |         | 1.00 (1.00-1.00)     | 0.175   |                        |         | 1.01 (1.01-1.01)      | <0.001  | 1.01 (1.00-1.01)       | 0.001   |
| <b>BMI (kg/m<sup>2</sup>) (per unit)</b>          | 1.03 (1.02-1.05)                              | <0.001  | 1.03 (1.02-1.05)       | <0.001  | 1.02 (1.01-1.03)     | <0.001  | 1.02 (1.00-1.03)       | 0.009   | 1.02 (1.00-1.04)     | 0.013   | 1.02 (1.00-1.03)       | 0.097   |                      |         |                        |         | 0.98 (0.96-1.00)      | 0.016   | 0.96 (0.95-0.98)       | <0.001  |
| <b>HbA1c (%) (per unit)</b>                       |                                               |         |                        |         | 1.04 (1.00-1.09)     | 0.075   | 1.02 (0.97-1.08)       | 0.477   | 1.21 (1.12-1.29)     | <0.001  | 1.14 (1.05-1.23)       | 0.002   | 1.09 (1.04-1.14)     | <0.001  | 1.05 (1.00-1.11)       | 0.040   |                       |         |                        |         |

\*Multivariable analyses are, where appropriate, adjusted for gender, diabetes duration, smoking, estimated glomerular filtration rates, body mass index and HbA1c.

#Hypertension is defined as systolic blood pressure >140mmHg and/or diastolic blood pressure >90 mmHg

†Dyslipidaemia is defined as either total cholesterol >4.0 mmol/L, high density lipoprotein <1.0 mmol/L, low density lipoprotein >2.0 mmol/L or triglycerides >2.0 mmol/L

‡Obesity is defined as Body Mass Index >30 kg/m<sup>2</sup>

**Suppl. Table 4:** Unadjusted and adjusted odds of variables associated with suboptimal glycaemic control and adverse cardiovascular risk factor levels, adjusted for diabetes centre type.

|                                                   | HbA1c above target (7.0%, 53 mmol/mol) |         |                        |         | Hypertension         |         |                        |         | Dyslipidaemia        |         |                        |         | Obesity              |         |                        |         | Current Smoker       |         |                        |         |
|---------------------------------------------------|----------------------------------------|---------|------------------------|---------|----------------------|---------|------------------------|---------|----------------------|---------|------------------------|---------|----------------------|---------|------------------------|---------|----------------------|---------|------------------------|---------|
|                                                   | Univariable Analysis                   |         | Multivariable Analysis |         | Univariable Analysis |         | Multivariable Analysis |         | Univariable Analysis |         | Multivariable Analysis |         | Univariable Analysis |         | Multivariable Analysis |         | Univariable Analysis |         | Multivariable Analysis |         |
|                                                   | OR (95%CI)                             | p value | OR (95%CI)             | p value | OR (95%CI)           | p value | OR (95%CI)             | p value | OR (95%CI)           | p value | OR (95%CI)             | p value | OR (95%CI)           | p value | OR (95%CI)             | p value | OR (95%CI)           | p value | OR (95%CI)             | p value |
| <b>Age</b>                                        |                                        |         |                        |         |                      |         |                        |         |                      |         |                        |         |                      |         |                        |         |                      |         |                        |         |
| ≥60 y (ref)                                       |                                        |         |                        |         |                      |         |                        |         |                      |         |                        |         |                      |         |                        |         |                      |         |                        |         |
| <60 y                                             | 1.26 (1.07-1.49)                       | 0.005   | 1.51 (1.23-1.86)       | <0.001  | 0.81 (0.70-0.95)     | 0.008   | 0.86 (0.70-1.05)       | 0.133   | 2.41 (1.91-3.03)     | <0.001  | 2.05 (1.55-2.72)       | <0.001  | 1.26 (1.09-1.46)     | 0.002   | 1.26 (1.06-1.50)       | 0.009   | 2.60 (2.09-3.22)     | <0.001  | 2.09 (1.61-2.72)       | <0.001  |
| <b>Duration of Diabetes</b>                       |                                        |         |                        |         |                      |         |                        |         |                      |         |                        |         |                      |         |                        |         |                      |         |                        |         |
| <10 y (ref)                                       |                                        |         |                        |         |                      |         |                        |         |                      |         |                        |         |                      |         |                        |         |                      |         |                        |         |
| ≥10 y                                             | 2.05 (1.74-2.40)                       | <0.001  | 2.52 (2.08-3.05)       | <0.001  | 1.16 (0.99-1.35)     | 0.067   | 1.04 (0.86-1.26)       | 0.702   | 0.66 (0.53-0.81)     | <0.001  | 0.80 (0.61-1.05)       | 0.115   | 1.04 (0.90-1.20)     | 0.597   |                        |         | 0.59 (0.48-0.73)     | <0.001  | 0.81 (0.63-1.04)       | 0.099   |
| <b>Sex</b>                                        |                                        |         |                        |         |                      |         |                        |         |                      |         |                        |         |                      |         |                        |         |                      |         |                        |         |
| Male (ref)                                        |                                        |         |                        |         |                      |         |                        |         |                      |         |                        |         |                      |         |                        |         |                      |         |                        |         |
| Female                                            | 1.18 (1.01-1.38)                       | 0.039   | 1.15 (0.96-1.38)       | 0.119   | 1.02 (0.88-1.18)     | 0.828   | 0.87 (0.72-1.04)       | 0.121   | 0.76 (0.62-0.92)     | 0.005   | 0.70 (0.55-0.90)       | 0.005   | 1.34 (1.16-1.54)     | <0.001  | 1.37 (1.16-1.63)       | <0.001  | 0.70 (0.56-0.87)     | 0.001   | 0.71 (0.55-0.90)       | 0.005   |
| <b>Smoking</b>                                    |                                        |         |                        |         |                      |         |                        |         |                      |         |                        |         |                      |         |                        |         |                      |         |                        |         |
| Never (ref)                                       |                                        |         |                        |         |                      |         |                        |         |                      |         |                        |         |                      |         |                        |         |                      |         |                        |         |
| Past                                              | 1.09 (0.9-1.32)                        | 0.368   |                        |         | 0.93 (0.79-1.10)     | 0.418   | 0.90 (0.74-1.09)       | 0.281   | 1.10 (0.87-1.38)     | 0.419   | 1.01 (0.78-1.32)       | 0.920   | 1.44 (1.22-1.71)     | <0.001  | 1.63 (1.35-1.97)       | <0.001  |                      |         |                        |         |
| Current                                           | 1.09 (0.84-1.42)                       | 0.512   |                        |         | 0.65 (0.50-0.84)     | 0.001   | 0.72 (0.54-0.96)       | 0.025   | 1.73 (1.18-2.52)     | 0.005   | 1.34 (0.89-2.02)       | 0.164   | 0.93 (0.74-1.17)     | 0.517   | 0.93 (0.73-1.19)       | 0.562   |                      |         |                        |         |
| <b>eGFR (ml/min/1.73m<sup>2</sup>) (per unit)</b> | 1.00 (0.99-1.00)                       | 0.073   | 1.00 (1.00-1.01)       | 0.040   | 1.00 (0.99-1.00)     | 0.001   | 1.00 (0.99-1.00)       | 0.007   | 1.00 (1.00-1.01)     | 0.144   |                        |         | 1.00 (1.00-1.00)     | 0.307   |                        |         | 1.01 (1.01-1.01)     | <0.001  | 1.01 (1.00-1.01)       | 0.001   |
| <b>BMI (kg/m<sup>2</sup>) (per unit)</b>          | 1.03 (1.02-1.04)                       | <0.001  | 1.03 (1.02-1.04)       | <0.001  | 1.02 (1.01-1.03)     | <0.001  | 1.02 (1.01-1.03)       | 0.001   | 1.02 (1.01-1.04)     | 0.004   | 1.02 (1.00-1.03)       | 0.088   |                      |         |                        |         | 0.98 (0.97-1.00)     | 0.017   | 0.97 (0.96-0.99)       | 0.001   |
| <b>HbA1c (%) (per unit)</b>                       |                                        |         |                        |         | 1.03 (0.99-1.07)     | 0.156   |                        |         | 1.18 (1.11-1.26)     | <0.001  | 1.13 (1.05-1.22)       | 0.001   | 1.07 (1.03-1.12)     | 0.001   | 1.05 (1.00-1.09)       | 0.054   |                      |         |                        |         |
| <b>Centre type<sup>^</sup></b>                    | 1.06 (0.83-1.36)                       | 0.617   | 1.25 (0.94-1.67)       | 0.122   | 1.18 (0.96-1.45)     | 0.115   | 1.07 (0.85-1.35)       | 0.576   | 1.04 (0.79-1.36)     | 0.802   | 1.25 (0.88-1.78)       | 0.203   | 1.15 (0.94-1.41)     | 0.180   | 1.18 (0.93-1.50)       | 0.170   | 0.17 (0.15-0.18)     | <0.001  | 0.75 (0.53-1.07)       | 0.113   |

\*Multivariable analyses are, where appropriate, adjusted for gender, diabetes duration, smoking, estimated glomerular filtration rates, body mass index and HbA1c.

#Hypertension is defined as systolic blood pressure >140mmHg and/or diastolic blood pressure >90 mmHg

†Dyslipidaemia is defined as either total cholesterol >4.0 mmol/L, high density lipoprotein <1.0 mmol/L, low density lipoprotein >2.0 mmol/L or triglycerides >2.0 mmol/L

‡Obesity is defined as Body Mass Index >30 kg/m<sup>2</sup>

<sup>^</sup> Tertiary care centres (reference group) compared with primary and secondary care centres

STROBE Statement—Checklist of items that should be included in reports of *cross-sectional studies*

|                              | Item No | Recommendation                                                                                                                                                                                    | Page No     |
|------------------------------|---------|---------------------------------------------------------------------------------------------------------------------------------------------------------------------------------------------------|-------------|
| <b>Title and abstract</b>    | 1       | (a) Indicate the study's design with a commonly used term in the title or the abstract                                                                                                            | 1           |
|                              |         | (b) Provide in the abstract an informative and balanced summary of what was done and what was found                                                                                               | 2           |
| <b>Introduction</b>          |         |                                                                                                                                                                                                   |             |
| Background/rationale         | 2       | Explain the scientific background and rationale for the investigation being reported                                                                                                              | 4           |
| Objectives                   | 3       | State specific objectives, including any prespecified hypotheses                                                                                                                                  | 4           |
| <b>Methods</b>               |         |                                                                                                                                                                                                   |             |
| Study design                 | 4       | Present key elements of study design early in the paper                                                                                                                                           | 5           |
| Setting                      | 5       | Describe the setting, locations, and relevant dates, including periods of recruitment, exposure, follow-up, and data collection                                                                   | 5           |
| Participants                 | 6       | (a) Give the eligibility criteria, and the sources and methods of selection of participants                                                                                                       | 5           |
| Variables                    | 7       | Clearly define all outcomes, exposures, predictors, potential confounders, and effect modifiers. Give diagnostic criteria, if applicable                                                          | 5           |
| Data sources/<br>measurement | 8*      | For each variable of interest, give sources of data and details of methods of assessment (measurement). Describe comparability of assessment methods if there is more than one group              | 5,6         |
| Bias                         | 9       | Describe any efforts to address potential sources of bias                                                                                                                                         | 15          |
| Study size                   | 10      | Explain how the study size was arrived at                                                                                                                                                         | 5           |
| Quantitative variables       | 11      | Explain how quantitative variables were handled in the analyses. If applicable, describe which groupings were chosen and why                                                                      | 5           |
| Statistical methods          | 12      | (a) Describe all statistical methods, including those used to control for confounding                                                                                                             | 6,7         |
|                              |         | (b) Describe any methods used to examine subgroups and interactions                                                                                                                               | 6,7         |
|                              |         | (c) Explain how missing data were addressed                                                                                                                                                       | 6,7         |
|                              |         | (d) If applicable, describe analytical methods taking account of sampling strategy                                                                                                                | N/A         |
|                              |         | (e) Describe any sensitivity analyses                                                                                                                                                             | 7           |
| <b>Results</b>               |         |                                                                                                                                                                                                   |             |
| Participants                 | 13*     | (a) Report numbers of individuals at each stage of study—eg numbers potentially eligible, examined for eligibility, confirmed eligible, included in the study, completing follow-up, and analysed | 7           |
|                              |         | (b) Give reasons for non-participation at each stage                                                                                                                                              | 5           |
|                              |         | (c) Consider use of a flow diagram                                                                                                                                                                | N/A         |
| Descriptive data             | 14*     | (a) Give characteristics of study participants (eg demographic, clinical, social) and information on exposures and potential confounders                                                          | 21          |
|                              |         | (b) Indicate number of participants with missing data for each variable of interest                                                                                                               | 7           |
| Outcome data                 | 15*     | Report numbers of outcome events or summary measures                                                                                                                                              | 7-<br>10,21 |
| Main results                 | 16      | (a) Give unadjusted estimates and, if applicable, confounder-adjusted estimates and their precision (eg, 95% confidence interval). Make clear                                                     | 7-<br>10,23 |

|                          |    |                                                                                                                                                                            |       |
|--------------------------|----|----------------------------------------------------------------------------------------------------------------------------------------------------------------------------|-------|
|                          |    | which confounders were adjusted for and why they were included                                                                                                             |       |
|                          |    | (b) Report category boundaries when continuous variables were categorized                                                                                                  | 7     |
|                          |    | (c) If relevant, consider translating estimates of relative risk into absolute risk for a meaningful time period                                                           | N/A   |
| Other analyses           | 17 | Report other analyses done—eg analyses of subgroups and interactions, and sensitivity analyses                                                                             | 10,28 |
| <b>Discussion</b>        |    |                                                                                                                                                                            |       |
| Key results              | 18 | Summarise key results with reference to study objectives                                                                                                                   | 11    |
| Limitations              | 19 | Discuss limitations of the study, taking into account sources of potential bias or imprecision. Discuss both direction and magnitude of any potential bias                 | 15    |
| Interpretation           | 20 | Give a cautious overall interpretation of results considering objectives, limitations, multiplicity of analyses, results from similar studies, and other relevant evidence | 12-14 |
| Generalisability         | 21 | Discuss the generalisability (external validity) of the study results                                                                                                      | 15    |
| <b>Other information</b> |    |                                                                                                                                                                            |       |
| Funding                  | 22 | Give the source of funding and the role of the funders for the present study and, if applicable, for the original study on which the present article is based              | 17    |

\*Give information separately for exposed and unexposed groups.

**Note:** An Explanation and Elaboration article discusses each checklist item and gives methodological background and published examples of transparent reporting. The STROBE checklist is best used in conjunction with this article (freely available on the Web sites of PLoS Medicine at <http://www.plosmedicine.org/>, Annals of Internal Medicine at <http://www.annals.org/>, and Epidemiology at <http://www.epidem.com/>). Information on the STROBE Initiative is available at [www.strobe-statement.org](http://www.strobe-statement.org).
