# Supplementary material for: Age-related differences in glycaemic control, cardiovascular disease risk factors and treatment in patients with type 2 diabetes: a cross-sectional study from the Australian National Diabetes Audit
Source: PubMed Central journal article supplement — BMJ Open. 2018 Aug 17;8(8):e020677. doi: 10.1136/bmjopen-2017-020677 (PMC6104781; doi:10.1136/bmjopen-2017-020677), 2018-08-17
Supplement: bmjopen-2017-020677supp001.pdf [file bmjopen-2017-020677supp001.pdf]

## Supplementary Tables

**Suppl. Table 1:** Number of participating diabetes centres and patients by state or territory

| <b>State/Territory</b>       | <b>Participating centres</b> | <b>Number of patients included</b> |
|------------------------------|------------------------------|------------------------------------|
| Australian Capital Territory | 1                            | 49                                 |
| New South Wales              | 13                           | 1246                               |
| Northern Territory           | 1                            | 91                                 |
| Queensland                   | 9                            | 758                                |
| South Australia              | 1                            | 44                                 |
| Tasmania                     | 3                            | 140                                |
| Victoria                     | 20                           | 1119                               |
| Western Australia            | 1                            | 45                                 |
| Total                        | 49                           | 3492                               |

**Suppl. Table 2: Unadjusted and adjusted odds of variables associated with prescribing gaps**

|                                          | <b>HbA1c &gt; 8.0% and not on insulin</b> |         |                        |         | <b>Hypertension and not on BP medication</b> |         |                        |         | <b>Dyslipidaemia and not on lipid medication</b> |         |                        |         |
|------------------------------------------|-------------------------------------------|---------|------------------------|---------|----------------------------------------------|---------|------------------------|---------|--------------------------------------------------|---------|------------------------|---------|
|                                          | Univariable Analysis                      |         | Multivariable Analysis |         | Univariable Analysis                         |         | Multivariable Analysis |         | Univariable Analysis                             |         | Multivariable Analysis |         |
|                                          | OR<br>(95% CI)                            | p value | OR<br>(95% CI)         | p value | OR<br>(95% CI)                               | p value | OR<br>(95% CI)         | p value | OR<br>(95% CI)                                   | p value | OR<br>(95% CI)         | p value |
| <b>Age (y)</b>                           |                                           |         |                        |         |                                              |         |                        |         |                                                  |         |                        |         |
| ≥60 (ref)                                |                                           |         |                        |         |                                              |         |                        |         |                                                  |         |                        |         |
| <60                                      | 1.23<br>(1.01-1.50)                       | 0.041   | 0.80<br>(0.61-1.04)    | 0.090   | 2.71<br>(1.91-3.83)                          | <0.001  | 1.84<br>(1.16-2.92)    | 0.010   | 2.17<br>(1.79-2.63)                              | <0.001  | 1.48<br>(1.15-1.90)    | 0.002   |
| <b>Duration of Diabetes (y)</b>          |                                           |         |                        |         |                                              |         |                        |         |                                                  |         |                        |         |
| <10 (ref)                                |                                           |         |                        |         |                                              |         |                        |         |                                                  |         |                        |         |
| ≥10                                      | 0.28<br>(0.23-0.35)                       | <0.001  | 0.28<br>(0.22-0.36)    | <0.001  | 0.39<br>(0.28-0.56)                          | <0.001  | 0.46<br>(0.29-0.71)    | 0.001   | 0.41<br>(0.34-0.50)                              | <0.001  | 0.54<br>(0.42-0.69)    | <0.001  |
| <b>Gender</b>                            |                                           |         |                        |         |                                              |         |                        |         |                                                  |         |                        |         |
| Male (ref)                               |                                           |         |                        |         |                                              |         |                        |         |                                                  |         |                        |         |
| Female                                   | 0.89<br>(0.73-1.08)                       | 0.239   | 0.87<br>(0.69-1.11)    | 0.260   | 0.96<br>(0.68-1.36)                          | 0.818   | 0.97<br>(0.62-1.51)    | 0.890   | 1.37<br>(1.13-1.66)                              | 0.001   | 1.19<br>(0.93-1.51)    | 0.160   |
| <b>Smoking</b>                           |                                           |         |                        |         |                                              |         |                        |         |                                                  |         |                        |         |
| Never (ref)                              |                                           |         |                        |         |                                              |         |                        |         |                                                  |         |                        |         |
| Past                                     | 0.83<br>(0.66-1.05)                       | 0.117   |                        |         | 0.57<br>(0.38-0.86)                          | 0.008   | 0.66<br>(0.41-1.09)    | 0.103   | 0.71<br>(0.57-0.90)                              | 0.005   | 0.76<br>(0.59-0.99)    | 0.043   |
| Current                                  | 0.97<br>(0.71-1.33)                       | 0.861   |                        |         | 1.57<br>(0.94-2.64)                          | 0.087   | 1.40<br>(0.74-2.65)    | 0.301   | 1.06<br>(0.78-1.44)                              | 0.711   | 1.03<br>(0.73-1.46)    | 0.856   |
| <b>eGFR (ml/min) (per unit)</b>          | 1.01<br>(1.00-1.01)                       | 0.001   | 1.00<br>(1.00-1.01)    | 0.049   | 1.02<br>(1.01-1.02)                          | <0.001  | 1.01<br>(1.00-1.01)    | 0.012   | 1.01<br>(1.01-1.01)                              | <0.001  | 1.01<br>(1.00-1.01)    | 0.005   |
| <b>BMI (kg/m<sup>2</sup>) (per unit)</b> | 0.98<br>(0.97-1.00)                       | 0.021   | 0.98<br>(0.96-0.99)    | 0.004   | 0.98<br>(0.96-1.00)                          | 0.100   | 0.95<br>(0.93-0.98)    | 0.002   | 0.99<br>(0.98-1.01)                              | 0.238   |                        |         |
| <b>HbA1c (%) (per unit)</b>              |                                           |         |                        |         | 1.05<br>(0.95-1.16)                          | 0.331   |                        |         | 0.98<br>(0.93-1.04)                              | 0.497   |                        |         |
| <b>Vascular disease</b>                  |                                           |         |                        |         |                                              |         |                        |         |                                                  |         |                        |         |
| No (ref)                                 |                                           |         |                        |         |                                              |         |                        |         |                                                  |         |                        |         |
| Yes                                      |                                           |         |                        |         | 0.37<br>(0.26-0.53)                          | <0.001  | 0.48<br>(0.31-0.75)    | 0.001   | 0.36<br>(0.29-0.44)                              | <0.001  | 0.51<br>(0.40-0.66)    | <0.001  |

\*Multivariable analyses are, where appropriate, adjusted for gender, diabetes duration, smoking, estimated glomerular filtration rates, body mass index and HbA1c.

#Hypertension is defined as systolic blood pressure >140mmHg and/or diastolic blood pressure >90 mmHg

†Dyslipidaemia is defined as either total cholesterol >4.0 mmol/L, high density lipoprotein <1.0 mmol/L, low density lipoprotein >2.0 mmol/L or triglycerides >2.0 mmol/L

**Suppl. Table 3:** Unadjusted and adjusted odds of variables associated with suboptimal glycaemic control and adverse cardiovascular risk factor levels, excluding patients with diabetes duration  $\leq 2$  years.

|                                                   | <b>HbA1c above target (7.0%, 53 mmol/mol)</b> |         |                        |         | <b>Hypertension</b>  |         |                        |         | <b>Dyslipidaemia</b> |         |                        |         | <b>Obesity</b>       |         |                        |         | <b>Current Smoker</b> |         |                        |         |
|---------------------------------------------------|-----------------------------------------------|---------|------------------------|---------|----------------------|---------|------------------------|---------|----------------------|---------|------------------------|---------|----------------------|---------|------------------------|---------|-----------------------|---------|------------------------|---------|
|                                                   | Univariable Analysis                          |         | Multivariable Analysis |         | Univariable Analysis |         | Multivariable Analysis |         | Univariable Analysis |         | Multivariable Analysis |         | Univariable Analysis |         | Multivariable Analysis |         | Univariable Analysis  |         | Multivariable Analysis |         |
|                                                   | OR (95%CI)                                    | p value | OR (95%CI)             | p value | OR (95%CI)           | p value | OR (95%CI)             | p value | OR (95%CI)           | p value | OR (95%CI)             | p value | OR (95%CI)           | p value | OR (95%CI)             | p value | OR (95%CI)            | p value | OR (95%CI)             | p value |
| <b>Age</b>                                        |                                               |         |                        |         |                      |         |                        |         |                      |         |                        |         |                      |         |                        |         |                       |         |                        |         |
| ≥60 y (ref)                                       |                                               |         |                        |         |                      |         |                        |         |                      |         |                        |         |                      |         |                        |         |                       |         |                        |         |
| <60 y                                             | 1.47<br>(1.22-1.77)                           | <0.001  | 1.59<br>(1.27-2.00)    | <0.001  | 0.88<br>(0.74-1.04)  | 0.122   | 0.90<br>(0.72-1.12)    | 0.339   | 2.17<br>(1.71-2.76)  | <0.001  | 1.89<br>(1.41-2.53)    | <0.001  | 1.31 (1.11-1.54)     | 0.001   | 1.28<br>(1.06-1.55)    | 0.010   | 2.50<br>(1.96-3.17)   | <0.001  | 2.19<br>(1.64-2.92)    | <0.001  |
| <b>Duration</b>                                   |                                               |         |                        |         |                      |         |                        |         |                      |         |                        |         |                      |         |                        |         |                       |         |                        |         |
| <10 y (ref)                                       |                                               |         |                        |         |                      |         |                        |         |                      |         |                        |         |                      |         |                        |         |                       |         |                        |         |
| ≥10 y                                             | 1.65<br>(1.37-1.98)                           | <0.001  | 2.05<br>(1.66-2.54)    | <0.001  | 1.10<br>(0.92-1.31)  | 0.295   |                        |         | 0.80<br>(0.63-1.01)  | 0.065   | 0.93<br>(0.70-1.25)    | 0.631   | 1.02<br>(0.86-1.21)  | 0.793   |                        |         | 0.71<br>(0.55-0.92)   | 0.009   | 1.00<br>(0.75-1.35)    | 0.983   |
| <b>Sex</b>                                        |                                               |         |                        |         |                      |         |                        |         |                      |         |                        |         |                      |         |                        |         |                       |         |                        |         |
| Male (ref)                                        |                                               |         |                        |         |                      |         |                        |         |                      |         |                        |         |                      |         |                        |         |                       |         |                        |         |
| Female                                            | 1.18<br>(0.99-1.40)                           | 0.062   | 1.18<br>(0.97-1.44)    | 0.093   | 1.05<br>(0.90-1.23)  | 0.555   | 0.96<br>(0.78-1.17)    | 0.657   | 0.75<br>(0.61-0.92)  | 0.006   | 0.70<br>(0.54-0.90)    | 0.006   | 1.29<br>(1.11-1.50)  | 0.001   | 1.35<br>(1.12-1.62)    | 0.001   | 0.74<br>(0.58-0.94)   | 0.015   | 0.77<br>(0.59-1.01)    | 0.060   |
| <b>Smoking</b>                                    |                                               |         |                        |         |                      |         |                        |         |                      |         |                        |         |                      |         |                        |         |                       |         |                        |         |
| Never (ref)                                       |                                               |         |                        |         |                      |         |                        |         |                      |         |                        |         |                      |         |                        |         |                       |         |                        |         |
| Past                                              | 1.08<br>(0.88-1.32)                           | 0.484   |                        |         | 0.92<br>(0.77-1.11)  | 0.387   | 0.97<br>(0.78-1.19)    | 0.748   | 1.08<br>(0.85-1.37)  | 0.539   | 0.97<br>(0.74-1.28)    | 0.853   | 1.51<br>(1.26-1.81)  | <0.001  | 1.69<br>(1.38-2.06)    | <0.001  |                       |         |                        |         |
| Current                                           | 1.22<br>(0.89-1.66)                           | 0.215   |                        |         | 0.68<br>(0.51-0.90)  | 0.006   | 0.74<br>(0.53-1.02)    | 0.062   | 1.46<br>(0.99-2.17)  | 0.058   | 1.18<br>(0.77-1.81)    | 0.446   | 0.95<br>(0.74-1.23)  | 0.712   | 0.90<br>(0.69-1.19)    | 0.468   |                       |         |                        |         |
| <b>eGFR (ml/min/1.73m<sup>2</sup>) (per unit)</b> | 1.00<br>(1.00-1.01)                           | 0.002   | 1.00<br>(1.00-1.01)    | 0.014   | 1.00 (0.99-1.00)     | 0.005   | 1.00<br>(0.99-1.00)    | 0.011   | 1.00<br>(1.00-1.00)  | 0.655   |                        |         | 1.00<br>(1.00-1.00)  | 0.175   |                        |         | 1.01<br>(1.01-1.01)   | <0.001  | 1.01<br>(1.00-1.01)    | 0.001   |
| <b>BMI (kg/m<sup>2</sup>) (per unit)</b>          | 1.03<br>(1.02-1.05)                           | <0.001  | 1.03<br>(1.02-1.05)    | <0.001  | 1.02<br>(1.01-1.03)  | <0.001  | 1.02<br>(1.00-1.03)    | 0.009   | 1.02<br>(1.00-1.04)  | 0.013   | 1.02<br>(1.00-1.03)    | 0.097   |                      |         |                        |         | 0.98<br>(0.96-1.00)   | 0.016   | 0.96<br>(0.95-0.98)    | <0.001  |
| <b>HbA1c (%) (per unit)</b>                       |                                               |         |                        |         | 1.04<br>(1.00-1.09)  | 0.075   | 1.02<br>(0.97-1.08)    | 0.477   | 1.21 (1.12-1.29)     | <0.001  | 1.14<br>(1.05-1.23)    | 0.002   | 1.09<br>(1.04-1.14)  | <0.001  | 1.05<br>(1.00-1.11)    | 0.040   |                       |         |                        |         |

\*Multivariable analyses are, where appropriate, adjusted for gender, diabetes duration, smoking, estimated glomerular filtration rates, body mass index and HbA1c.

#Hypertension is defined as systolic blood pressure >140mmHg and/or diastolic blood pressure >90 mmHg

†Dyslipidaemia is defined as either total cholesterol >4.0 mmol/L, high density lipoprotein <1.0 mmol/L, low density lipoprotein >2.0 mmol/L or triglycerides >2.0 mmol/L

‡Obesity is defined as Body Mass Index >30 kg/m<sup>2</sup>

**Suppl. Table 4:** Unadjusted and adjusted odds of variables associated with suboptimal glycaemic control and adverse cardiovascular risk factor levels, adjusted for diabetes centre type.

|                                                   | HbA1c above target (7.0%, 53 mmol/mol) |         |                        |         | Hypertension         |         |                        |         | Dyslipidaemia        |         |                        |         | Obesity              |         |                        |         | Current Smoker       |         |                        |         |
|---------------------------------------------------|----------------------------------------|---------|------------------------|---------|----------------------|---------|------------------------|---------|----------------------|---------|------------------------|---------|----------------------|---------|------------------------|---------|----------------------|---------|------------------------|---------|
|                                                   | Univariable Analysis                   |         | Multivariable Analysis |         | Univariable Analysis |         | Multivariable Analysis |         | Univariable Analysis |         | Multivariable Analysis |         | Univariable Analysis |         | Multivariable Analysis |         | Univariable Analysis |         | Multivariable Analysis |         |
|                                                   | OR (95%CI)                             | p value | OR (95%CI)             | p value | OR (95%CI)           | p value | OR (95%CI)             | p value | OR (95%CI)           | p value | OR (95%CI)             | p value | OR (95%CI)           | p value | OR (95%CI)             | p value | OR (95%CI)           | p value | OR (95%CI)             | p value |
| <b>Age</b>                                        |                                        |         |                        |         |                      |         |                        |         |                      |         |                        |         |                      |         |                        |         |                      |         |                        |         |
| ≥60 y (ref)                                       |                                        |         |                        |         |                      |         |                        |         |                      |         |                        |         |                      |         |                        |         |                      |         |                        |         |
| <60 y                                             | 1.26 (1.07-1.49)                       | 0.005   | 1.51 (1.23-1.86)       | <0.001  | 0.81 (0.70-0.95)     | 0.008   | 0.86 (0.70-1.05)       | 0.133   | 2.41 (1.91-3.03)     | <0.001  | 2.05 (1.55-2.72)       | <0.001  | 1.26 (1.09-1.46)     | 0.002   | 1.26 (1.06-1.50)       | 0.009   | 2.60 (2.09-3.22)     | <0.001  | 2.09 (1.61-2.72)       | <0.001  |
| <b>Duration of Diabetes</b>                       |                                        |         |                        |         |                      |         |                        |         |                      |         |                        |         |                      |         |                        |         |                      |         |                        |         |
| <10 y (ref)                                       |                                        |         |                        |         |                      |         |                        |         |                      |         |                        |         |                      |         |                        |         |                      |         |                        |         |
| ≥10 y                                             | 2.05 (1.74-2.40)                       | <0.001  | 2.52 (2.08-3.05)       | <0.001  | 1.16 (0.99-1.35)     | 0.067   | 1.04 (0.86-1.26)       | 0.702   | 0.66 (0.53-0.81)     | <0.001  | 0.80 (0.61-1.05)       | 0.115   | 1.04 (0.90-1.20)     | 0.597   |                        |         | 0.59 (0.48-0.73)     | <0.001  | 0.81 (0.63-1.04)       | 0.099   |
| <b>Sex</b>                                        |                                        |         |                        |         |                      |         |                        |         |                      |         |                        |         |                      |         |                        |         |                      |         |                        |         |
| Male (ref)                                        |                                        |         |                        |         |                      |         |                        |         |                      |         |                        |         |                      |         |                        |         |                      |         |                        |         |
| Female                                            | 1.18 (1.01-1.38)                       | 0.039   | 1.15 (0.96-1.38)       | 0.119   | 1.02 (0.88-1.18)     | 0.828   | 0.87 (0.72-1.04)       | 0.121   | 0.76 (0.62-0.92)     | 0.005   | 0.70 (0.55-0.90)       | 0.005   | 1.34 (1.16-1.54)     | <0.001  | 1.37 (1.16-1.63)       | <0.001  | 0.70 (0.56-0.87)     | 0.001   | 0.71 (0.55-0.90)       | 0.005   |
| <b>Smoking</b>                                    |                                        |         |                        |         |                      |         |                        |         |                      |         |                        |         |                      |         |                        |         |                      |         |                        |         |
| Never (ref)                                       |                                        |         |                        |         |                      |         |                        |         |                      |         |                        |         |                      |         |                        |         |                      |         |                        |         |
| Past                                              | 1.09 (0.9-1.32)                        | 0.368   |                        |         | 0.93 (0.79-1.10)     | 0.418   | 0.90 (0.74-1.09)       | 0.281   | 1.10 (0.87-1.38)     | 0.419   | 1.01 (0.78-1.32)       | 0.920   | 1.44 (1.22-1.71)     | <0.001  | 1.63 (1.35-1.97)       | <0.001  |                      |         |                        |         |
| Current                                           | 1.09 (0.84-1.42)                       | 0.512   |                        |         | 0.65 (0.50-0.84)     | 0.001   | 0.72 (0.54-0.96)       | 0.025   | 1.73 (1.18-2.52)     | 0.005   | 1.34 (0.89-2.02)       | 0.164   | 0.93 (0.74-1.17)     | 0.517   | 0.93 (0.73-1.19)       | 0.562   |                      |         |                        |         |
| <b>eGFR (ml/min/1.73m<sup>2</sup>) (per unit)</b> | 1.00 (0.99-1.00)                       | 0.073   | 1.00 (1.00-1.01)       | 0.040   | 1.00 (0.99-1.00)     | 0.001   | 1.00 (0.99-1.00)       | 0.007   | 1.00 (1.00-1.01)     | 0.144   |                        |         | 1.00 (1.00-1.00)     | 0.307   |                        |         | 1.01 (1.01-1.01)     | <0.001  | 1.01 (1.00-1.01)       | 0.001   |
| <b>BMI (kg/m<sup>2</sup>) (per unit)</b>          | 1.03 (1.02-1.04)                       | <0.001  | 1.03 (1.02-1.04)       | <0.001  | 1.02 (1.01-1.03)     | <0.001  | 1.02 (1.01-1.03)       | 0.001   | 1.02 (1.01-1.04)     | 0.004   | 1.02 (1.00-1.03)       | 0.088   |                      |         |                        |         | 0.98 (0.97-1.00)     | 0.017   | 0.97 (0.96-0.99)       | 0.001   |
| <b>HbA1c (%) (per unit)</b>                       |                                        |         |                        |         | 1.03 (0.99-1.07)     | 0.156   |                        |         | 1.18 (1.11-1.26)     | <0.001  | 1.13 (1.05-1.22)       | 0.001   | 1.07 (1.03-1.12)     | 0.001   | 1.05 (1.00-1.09)       | 0.054   |                      |         |                        |         |
| <b>Centre type<sup>^</sup></b>                    | 1.06 (0.83-1.36)                       | 0.617   | 1.25 (0.94-1.67)       | 0.122   | 1.18 (0.96-1.45)     | 0.115   | 1.07 (0.85-1.35)       | 0.576   | 1.04 (0.79-1.36)     | 0.802   | 1.25 (0.88-1.78)       | 0.203   | 1.15 (0.94-1.41)     | 0.180   | 1.18 (0.93-1.50)       | 0.170   | 0.17 (0.15-0.18)     | <0.001  | 0.75 (0.53-1.07)       | 0.113   |

\*Multivariable analyses are, where appropriate, adjusted for gender, diabetes duration, smoking, estimated glomerular filtration rates, body mass index and HbA1c.

#Hypertension is defined as systolic blood pressure >140mmHg and/or diastolic blood pressure >90 mmHg

†Dyslipidaemia is defined as either total cholesterol >4.0 mmol/L, high density lipoprotein <1.0 mmol/L, low density lipoprotein >2.0 mmol/L or triglycerides >2.0 mmol/L

‡Obesity is defined as Body Mass Index >30 kg/m<sup>2</sup>

<sup>^</sup> Tertiary care centres (reference group) compared with primary and secondary care centres
